# Supplementary material
Source: PubMed Central journal article supplement (PMC7685729)
Supplement: jci-130-140378-s080.pdf [file jci-130-140378-s080.pdf]

## **Figure S1**

**Gating strategy for H3.3K27M-reactive CD8+ T-cells.** A representative gating strategy to identify CD8+ T-cells from patient-derived PBMCs that exhibit reactivity for K27M on CyTOF above background levels. Cells staining double-positive with iridium (Ir) intercalator in channels 191 and 193 were identified as intact cells (*left*). Cells with low cisplatin staining were identified as live cells (*second to left*). Cells staining positive for CD45 and CD3 were selected as T-cells (*middle*). Cells staining positive for CD8+ were identified as CD8+ T-cells (*second to right*). Cells staining above background levels with H3.3K27M dextramer were identified as H3.3K27M-reactive CD8+ T-cells (*right*). Healthy donor (**A**) and H3.3K27M-specific TCR-transduced CD8+ T-cells (**B**) were used to validate the specificity and sensitivity of the H3.3K27M dextramer respectively. CD8+ T-cells derived from a representative patient (**C**) exhibiting reactivity for H3.3K27M above background were classified as H3.3K27M-reactive CD8+ T-cells.

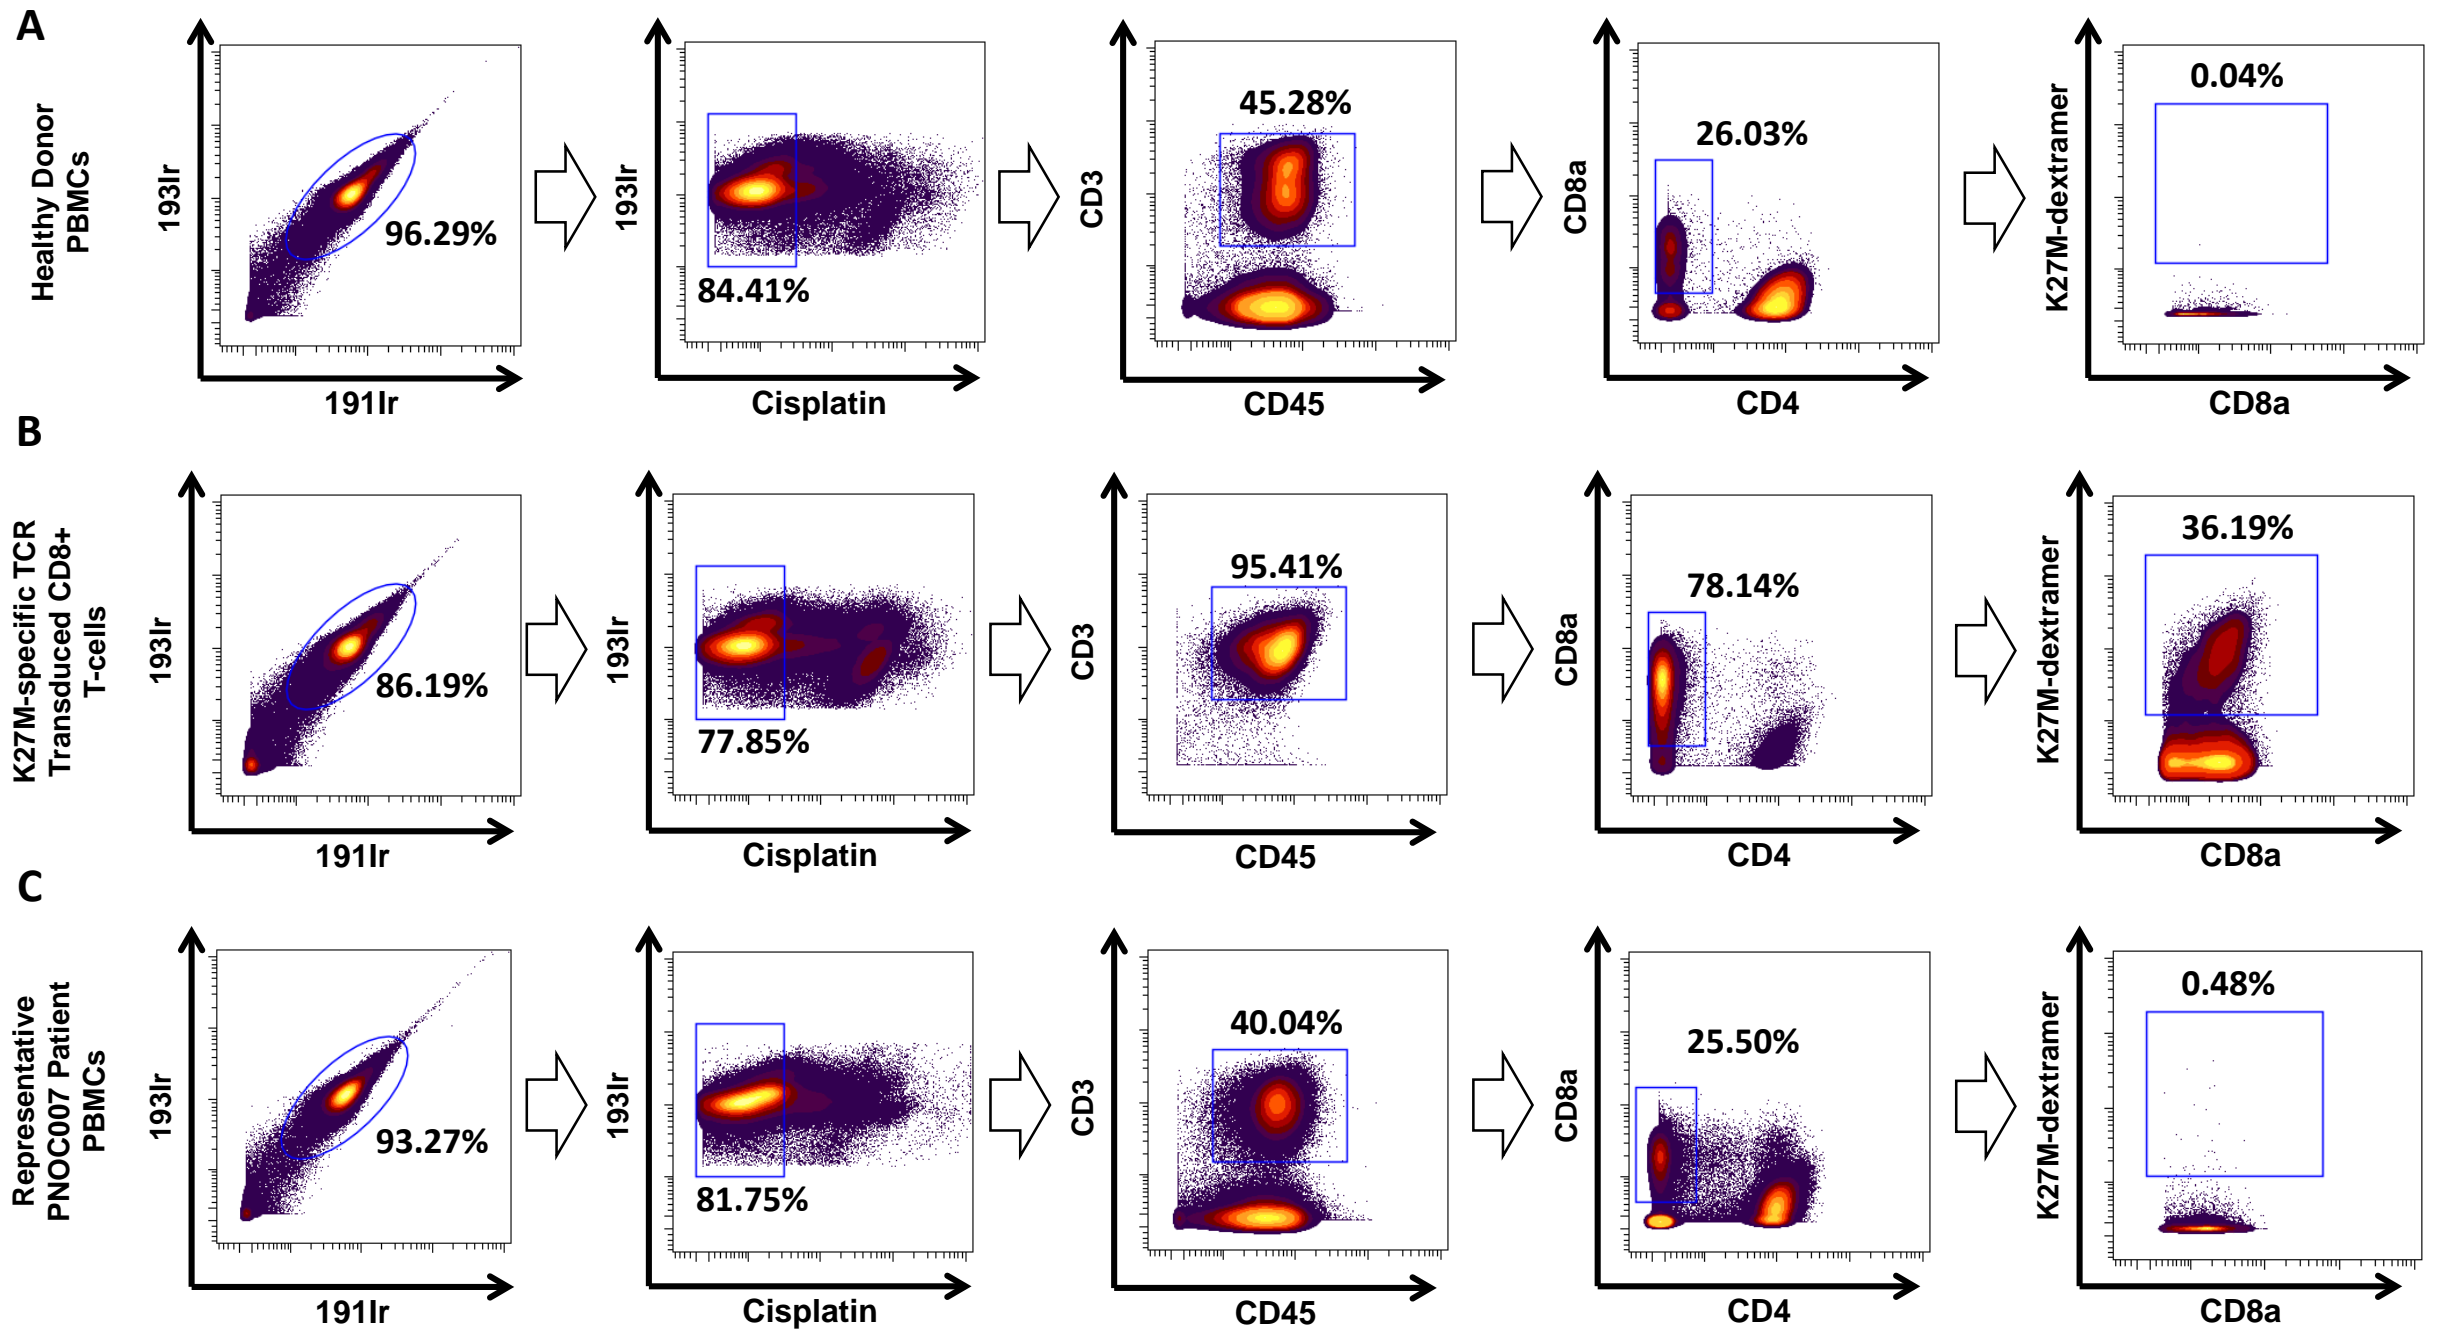

## **Figure S2**

**Mass cytometry-based detection of H3.3K27M-reactive CD8+ T-cell is as sensitive as conventional flow cytometry using H3.3K27M dextramer.** CD8+ T-cells were detected from the same patient on both flow cytometry (*above*) and mass cytometry (*below*), exhibiting comparable percentages of overall CD8+ T-cells that were identified as H3.3K27M-reactive.

# PNOC007-12 CD8+ T-cells

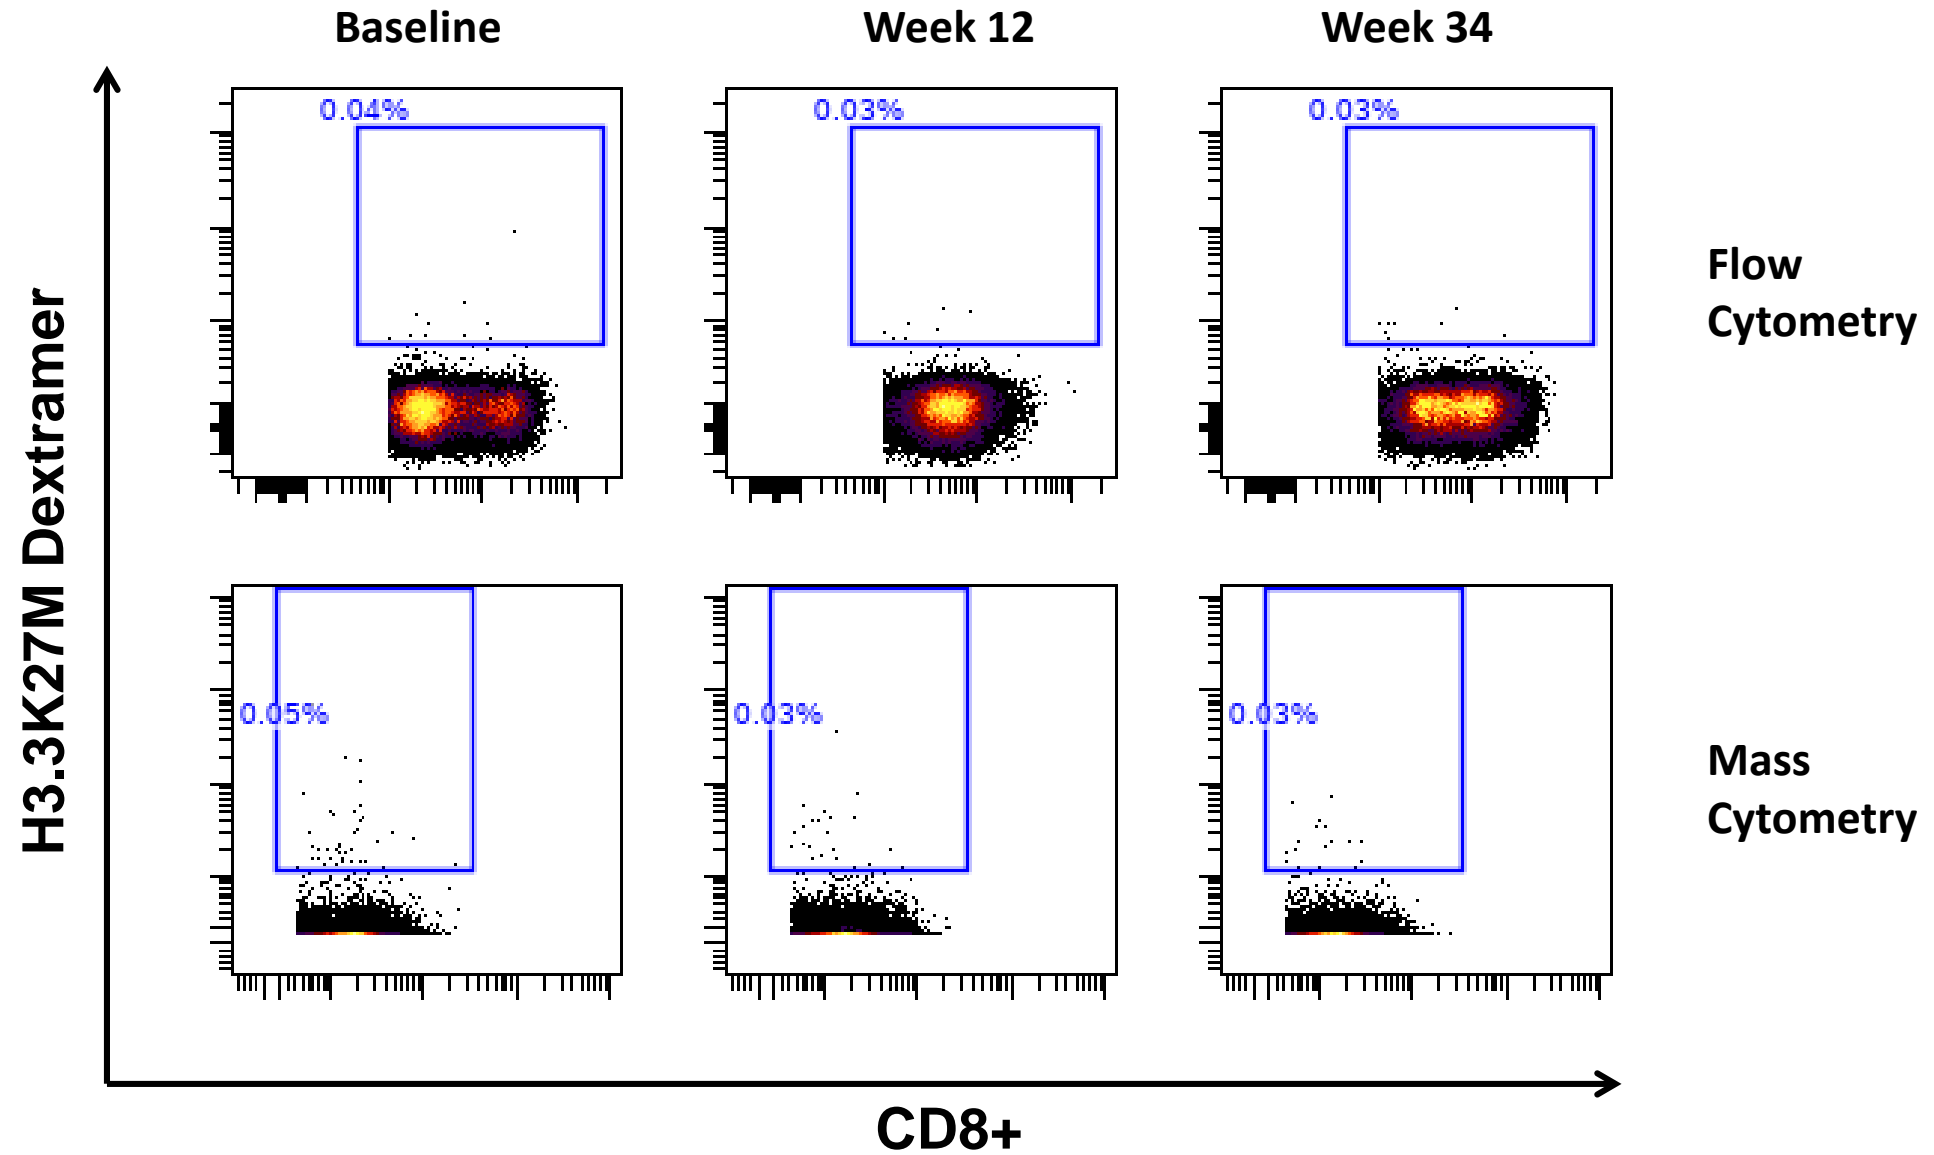

### **Figure S3**

**tSNE stratification and expression profiles of discrete H3.3K27M-reactive CD8+ T-cell subpopulations.** *Top-left*, H3.3K27M-reactive CD8+ T-cells were stratified on a tSNE plot using the CD8+ T-cell canonical markers: CD45RA, CD45RO, CCR7, CD27, and CD127. *Bottom-left*, heat map visualizing the z-score normalized expression of resultant H3.3K27M-reactive CD8+ T-cell clusters. *Right*, CyTOF-based marker expression profiles and phenotypic characterizations of H3.3K27M-reactive CD8+ T-cell clusters identified via tSNE stratification.

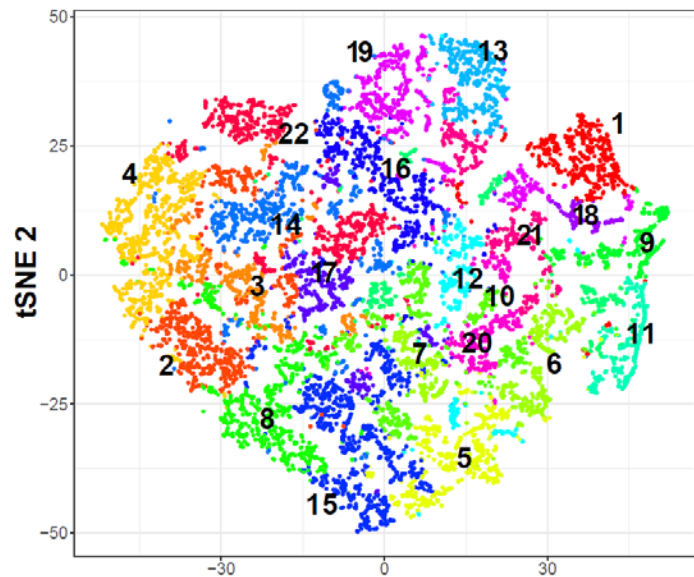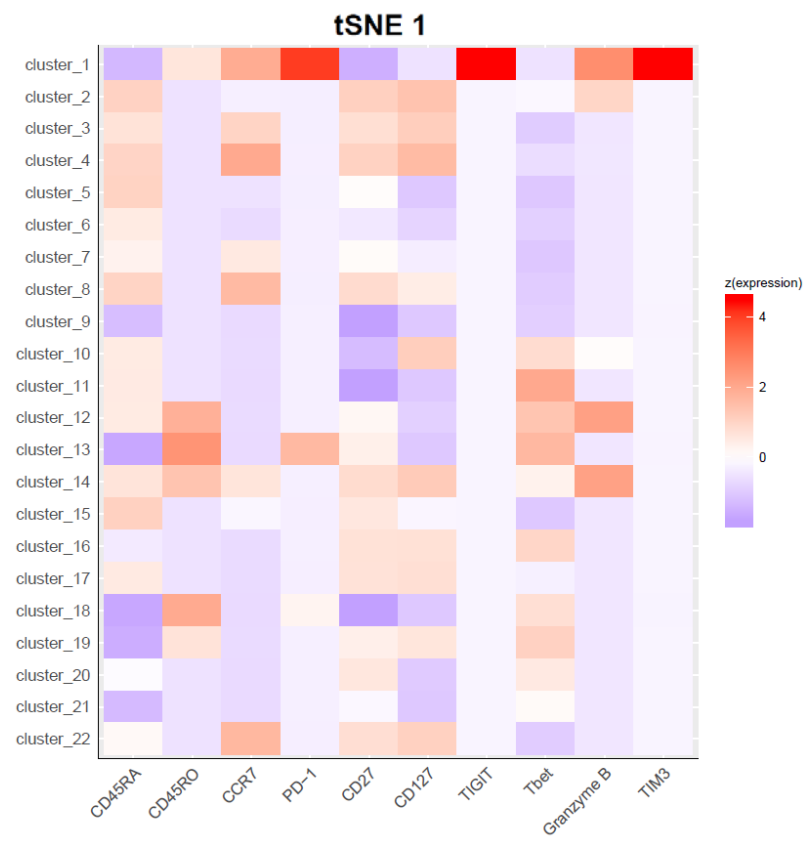

| Cluster Number | Phenotype                                                                                                                                                  |
|----------------|------------------------------------------------------------------------------------------------------------------------------------------------------------|
| 1              | CD45RO <sup>+</sup> CD27 <sup>-</sup> CD127 <sup>-</sup> TIM3 <sup>+</sup> PD-1 <sup>+</sup> Tbet <sup>-</sup>                                             |
| 2              | CD45RA <sup>+</sup> CCR7 <sup>lo</sup> CD27 <sup>+</sup> CD127 <sup>+</sup> CD29 <sup>-</sup> Tbet <sup>-</sup>                                            |
| 3              | CD45RA <sup>+</sup> CCR7 <sup>+</sup> CD27 <sup>+</sup> CD127 <sup>+</sup> CD29 <sup>-</sup> Tbet <sup>-</sup>                                             |
| 4              | CD45RA <sup>+</sup> CCR7 <sup>+</sup> CD27 <sup>+</sup> CD127 <sup>+</sup> CD29 <sup>-</sup> Tbet <sup>-</sup>                                             |
| 5              | CD45RA <sup>+</sup> CCR7 <sup>-</sup> CD27 <sup>mid</sup> CD127 <sup>-</sup> CD29 <sup>-</sup> Tbet <sup>-</sup>                                           |
| 6              | CD45RA <sup>+</sup> CCR7 <sup>-</sup> CD27 <sup>-</sup> CD127 <sup>-</sup> CD29 <sup>-</sup> Tbet <sup>-</sup>                                             |
| 7              | CD45RA <sup>+</sup> CCR7 <sup>hi</sup> CD27 <sup>mid</sup> CD127 <sup>-</sup> CD29 <sup>-</sup> Tbet <sup>-</sup>                                          |
| 8              | CD45RA <sup>+</sup> CCR7 <sup>++</sup> CD27 <sup>+</sup> CD127 <sup>+</sup> CD29 <sup>-</sup> Tbet <sup>-</sup>                                            |
| 9              | All markers low                                                                                                                                            |
| 10             | CD45RA <sup>+</sup> CCR7 <sup>-</sup> CD27 <sup>-</sup> CD127 <sup>+</sup> CD29 <sup>hi</sup> Tbet <sup>+</sup> CD49d <sup>+</sup>                         |
| 11             | CD45RA <sup>+</sup> CCR7 <sup>-</sup> CD27 <sup>-</sup> CD127 <sup>-</sup> CD29 <sup>hi</sup> Tbet <sup>+</sup> CD49d <sup>-</sup>                         |
| 12             | CD45RA <sup>+</sup> CD45RO <sup>+</sup> CCR7 <sup>mid</sup> CD27 <sup>hi</sup> CD127 <sup>+</sup> CD29 <sup>+</sup> Tbet <sup>+</sup> CD49d <sup>mid</sup> |
| 13             | CD45RO <sup>+</sup> CCR7 <sup>-</sup> CD27 <sup>hi</sup> CD127 <sup>-</sup> CD29 <sup>+</sup> Tbet <sup>+</sup>                                            |
| 14             | CD45RA <sup>+</sup> CD45RO <sup>+</sup> CCR7 <sup>+</sup> CD27 <sup>+</sup> CD127 <sup>+</sup> CD29 <sup>+</sup> Tbet <sup>hi</sup> CD49d <sup>+</sup>     |
| 15             | CD45RA <sup>+</sup> CCR7 <sup>mid</sup> CD27 <sup>+</sup> CD127 <sup>-</sup> CD29 <sup>-</sup> Tbet <sup>-</sup>                                           |
| 16             | CD45RA <sup>+</sup> CCR7 <sup>-</sup> CD27 <sup>+</sup> CD127 <sup>+</sup> CD29 <sup>hi</sup> Tbet <sup>+</sup>                                            |
| 17             | CD45RA <sup>+</sup> CCR7 <sup>-</sup> CD27 <sup>+</sup> CD127 <sup>+</sup> CD29 <sup>-</sup> Tbet <sup>-</sup>                                             |
| 18             | CD45RO <sup>+</sup> CCR7 <sup>-</sup> CD27 <sup>-</sup> CD127 <sup>-</sup> CD29 <sup>+</sup> Tbet <sup>+</sup>                                             |
| 19             | CD45RO <sup>+</sup> CCR7 <sup>-</sup> CD27 <sup>hi</sup> CD127 <sup>+</sup> CD29 <sup>+</sup> Tbet <sup>+</sup> CD49d <sup>mid</sup>                       |
| 20             | CD45RA <sup>+</sup> CCR7 <sup>-</sup> CD27 <sup>+</sup> CD127 <sup>-</sup> CD29 <sup>mid</sup> Tbet <sup>hi</sup>                                          |
| 21             | Almost all markers low                                                                                                                                     |
| 22             | CD45RA <sup>+</sup> CCR7 <sup>+</sup> CD27 <sup>+</sup> CD127 <sup>+</sup> CD29 <sup>-</sup> Tbet <sup>-</sup>                                             |

| Color Key        |
|------------------|
| Early Activated  |
| Stem Cell Memory |
| Effector         |
| Effector Memory  |
| Exhausted        |

**Figure S4**

**Spider plot depicting longitudinal patient-specific H3.3K27M-reactive CD8+ T-cell frequencies of both Strata A+B patients and Stratum A patients alone**

## Strata A + B Patients (n = 18)

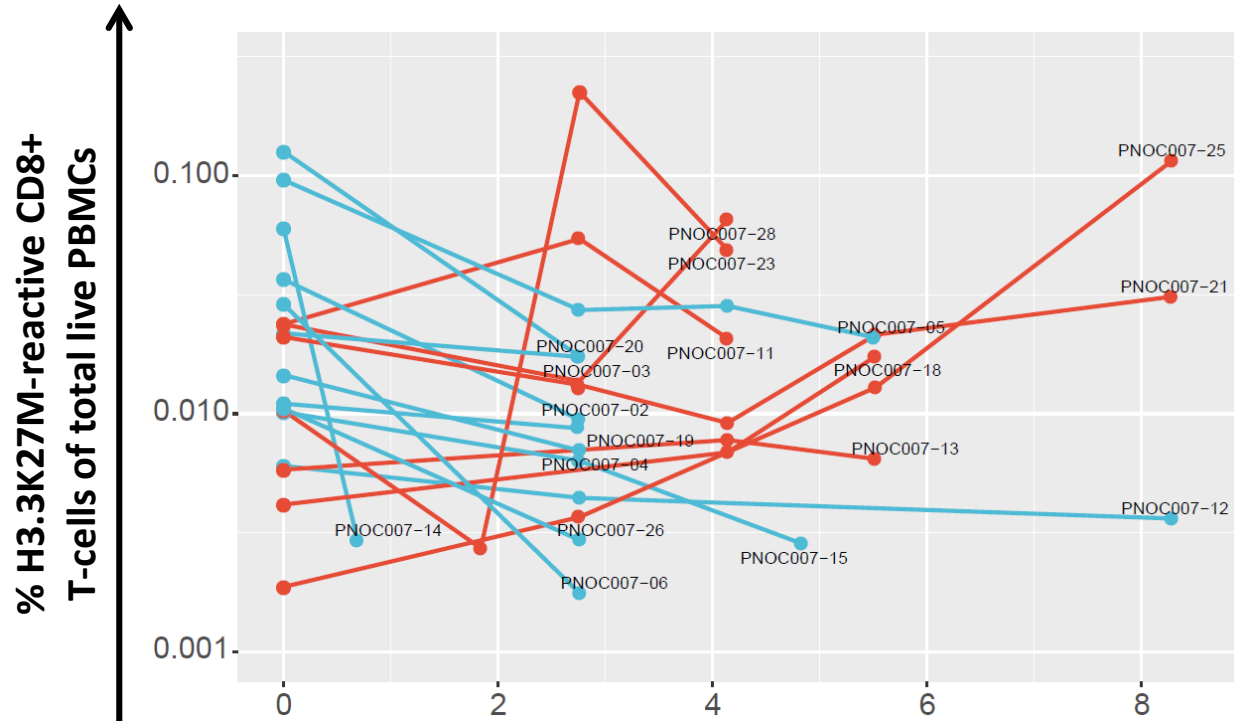

Immunological Response ☒ Yes ☐ No

## Stratum A Patients (n = 12)

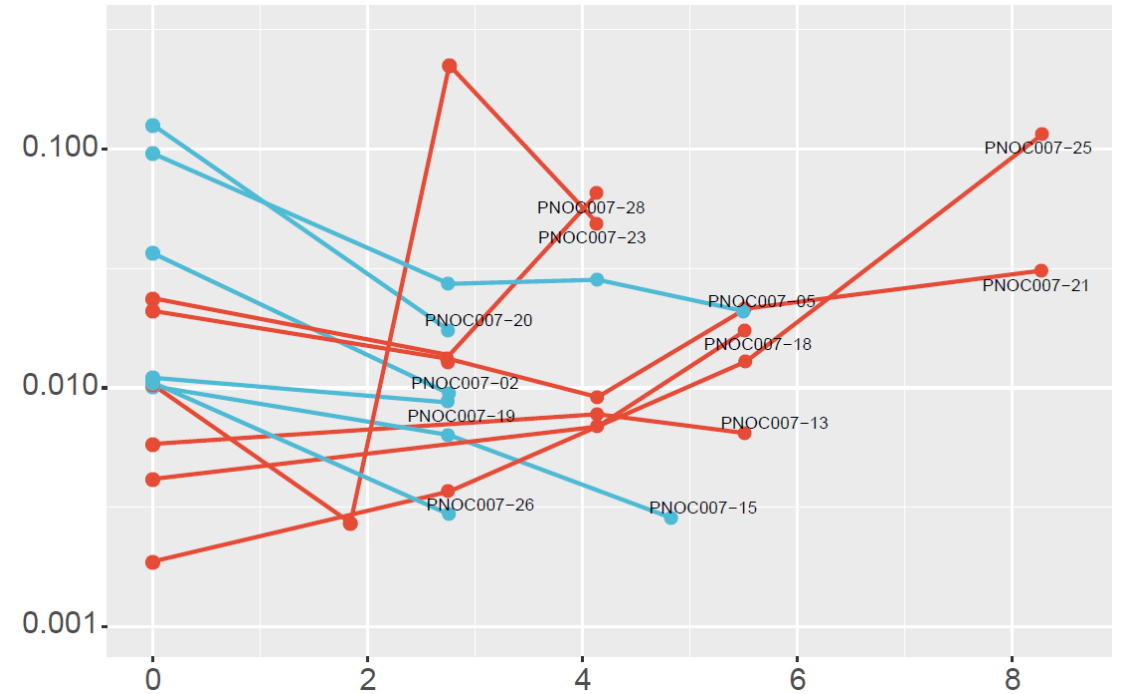

**Time since baseline (months)**

**Table S1**

**Table depicting multivariate cox proportional hazards analyses using overall survival for both Strata A+B and Stratum A patients alone for non-confounding immune profiles**

# Strata A+B Patients

**Table S1: Multivariate Analysis of Immune Profiles**

| Parameter                                   | Condition   | Hazard Ratio*<br>(95% CI) | P-value    | Confounding (P-value via Fisher's Exact Test) |                            |                         |                                             |
|---------------------------------------------|-------------|---------------------------|------------|-----------------------------------------------|----------------------------|-------------------------|---------------------------------------------|
|                                             |             |                           |            | Immunological Response                        | Bulk CD8+ T-cell Expansion | Baseline MDSC Abundance | H3.3K27M-reactive T <sub>EX</sub> Expansion |
| Immunological Response                      | No (n=11)   | Reference                 | p < 0.01** |                                               |                            |                         |                                             |
|                                             | Yes (n=7)   | 0.04<br>(0.004 – 0.045)   |            |                                               | p = 0.33                   | p = 0.34                | p = 0.32                                    |
| Bulk CD8+ T-cell Expansion                  | No (n=13)   | Reference                 | p = 0.13   |                                               |                            |                         |                                             |
|                                             | Yes (n=5)   | 4.00<br>(0.67 – 23.88)    |            |                                               |                            | p = 1.00                | p = 0.61                                    |
| Baseline MDSC Abundance                     | High (n=14) | Reference                 | p = 0.15   |                                               |                            |                         |                                             |
|                                             | Low (n=14)  | 0.34<br>(0.08 – 1.51)     |            |                                               |                            |                         | p = 0.62                                    |
| H3.3K27M-reactive T <sub>EX</sub> Expansion | No (n=6)    | Reference                 | p = 0.08   |                                               |                            |                         |                                             |
|                                             | Yes (n=12)  | 3.75<br>(0.85 – 16.54)    |            |                                               |                            |                         |                                             |

# Stratum A Patients

| Parameter                                          | Condition   | Hazard Ratio<br>(95% CI) | P-value   | Confounding (P-value via Fisher's Exact Test) |                                |                            |                                                    |
|----------------------------------------------------|-------------|--------------------------|-----------|-----------------------------------------------|--------------------------------|----------------------------|----------------------------------------------------|
|                                                    |             |                          |           | Immunological<br>Response                     | Bulk CD8+ T-<br>cell Expansion | Baseline MDSC<br>Abundance | H3.3K27M-<br>reactive T <sub>EX</sub><br>Expansion |
| Immunological<br>Response                          | No (n=6)    | Reference                | p = 0.10  |                                               |                                |                            |                                                    |
|                                                    | Yes (n=6)   | 0.03<br>(0.001 – 1.960)  |           |                                               | p = 0.55                       | p = 1.00                   | p = 0.55                                           |
| Bulk CD8+ T-cell<br>Expansion                      | No (n=8)    | Reference                | p = 0.16  |                                               |                                |                            |                                                    |
|                                                    | Yes (n=4)   | 15.21<br>(0.33 – 668.70) |           |                                               |                                | p = 0.58                   | p = 1.00                                           |
| Baseline MDSC<br>Abundance                         | High (n=10) | Reference                | p = 0.04* |                                               |                                |                            |                                                    |
|                                                    | Low (n=9)   | 0.09<br>(0.01 – 0.92)    |           |                                               |                                |                            | p = 0.58                                           |
| H3.3K27M-<br>reactive T <sub>EX</sub><br>Expansion | No (n=4)    | Reference                | p = 0.45  |                                               |                                |                            |                                                    |
|                                                    | Yes (n=8)   | 2.12<br>(0.30 – 14.92)   |           |                                               |                                |                            |                                                    |

\*Hazard ratios derived from overall survival

**Figure S5**

**Kaplan-Meier survival curves visualizing OS among strata A + B patients based on the expansion of H3.3K27M-reactive CD8+ T-cell subpopulations.**

**Overall CD8+**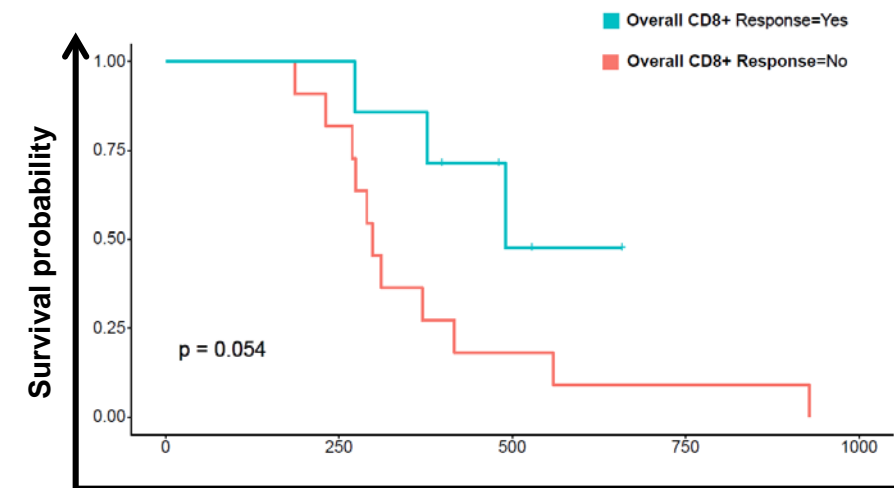**Early Activated CD8+**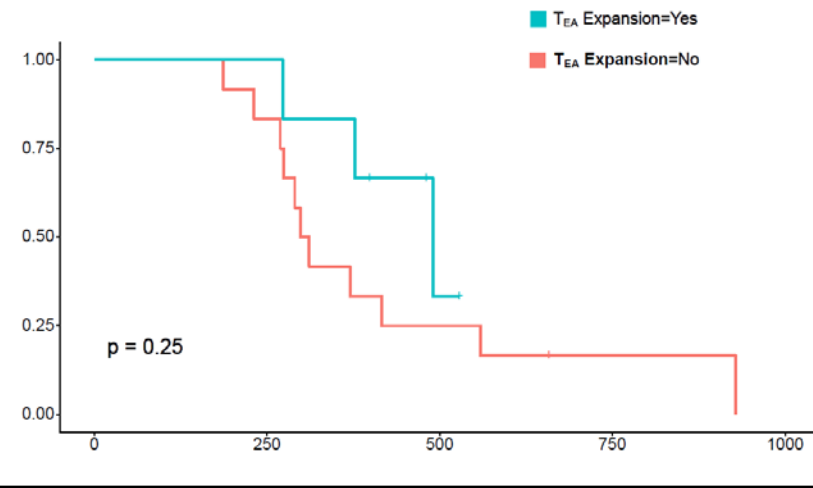**Stem Cell Memory CD8+**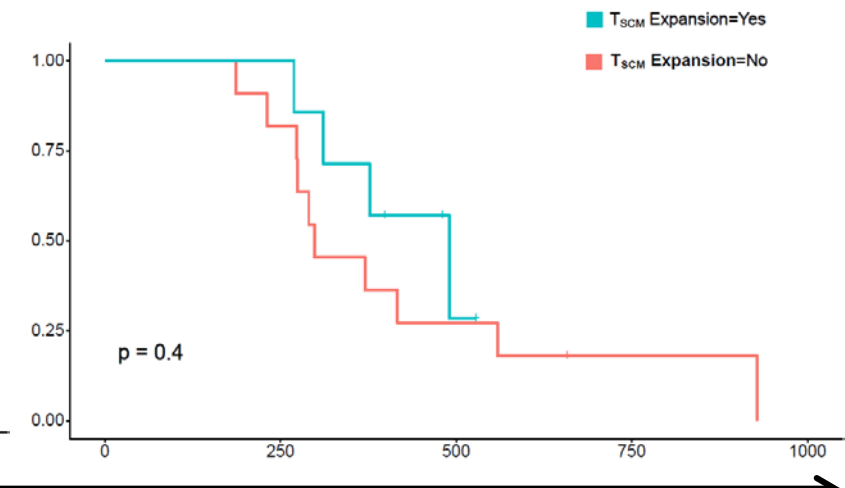

Time (days)

**Effector CD8+**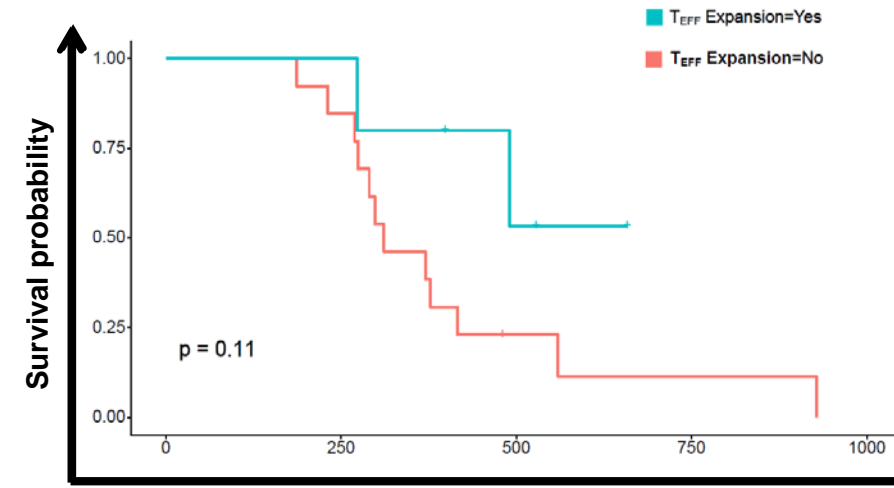**Effector Memory CD8+**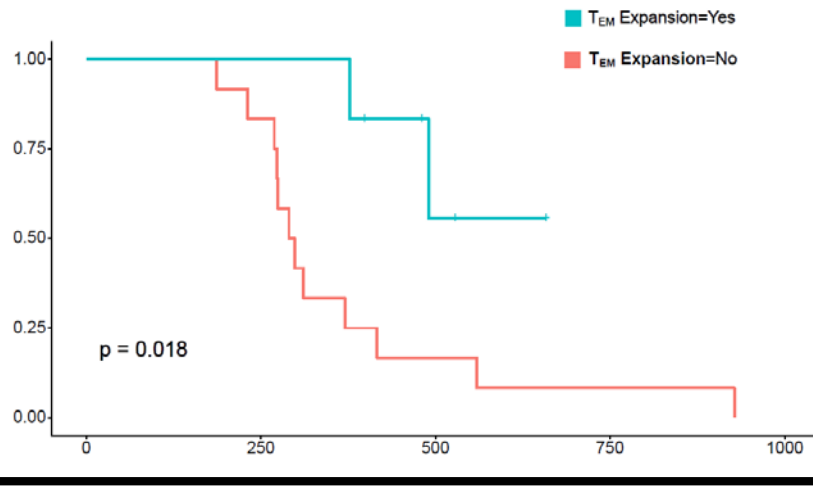**Exhausted CD8+**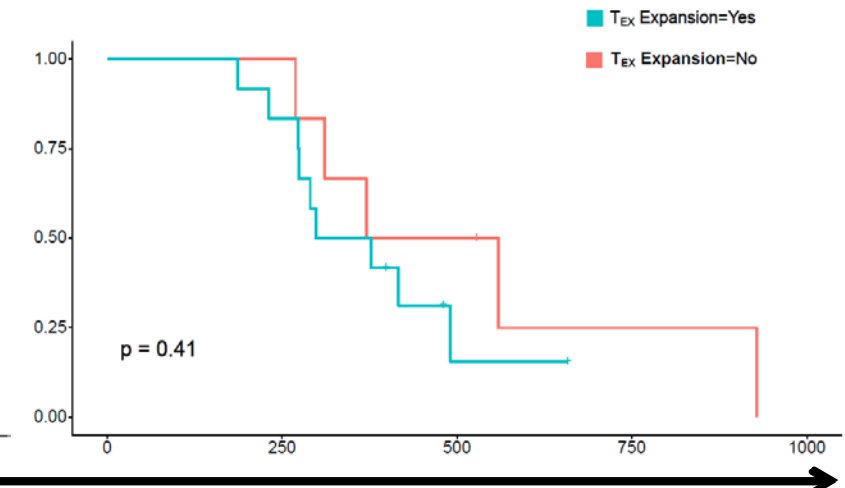

Time (days)

**Figure S6**

**Kaplan-Meier survival curves visualizing PFS among strata A + B patients based on the expansion of H3.3K27M-reactive CD8<sup>+</sup> T-cell subpopulations.**

**Overall CD8+**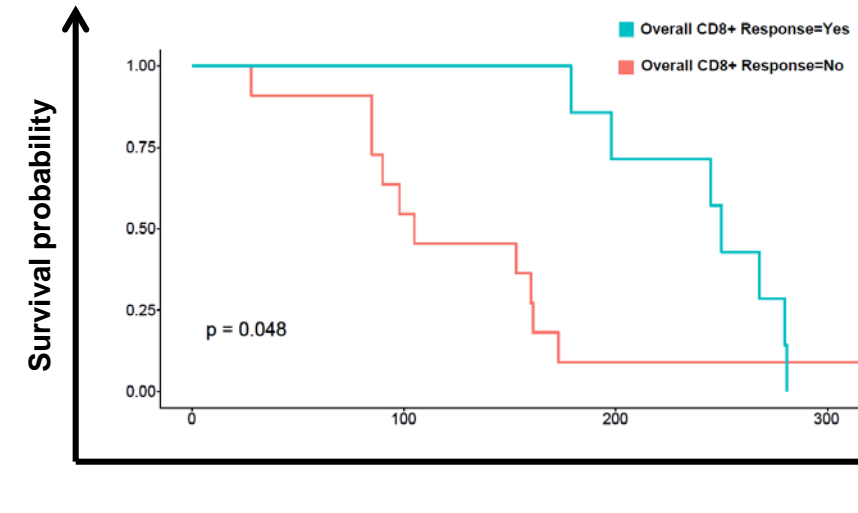**Early Activated CD8+**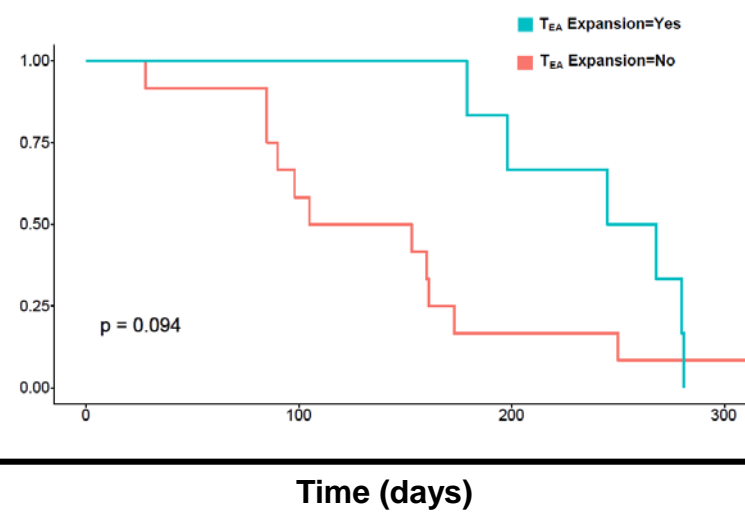**Stem Cell Memory CD8+**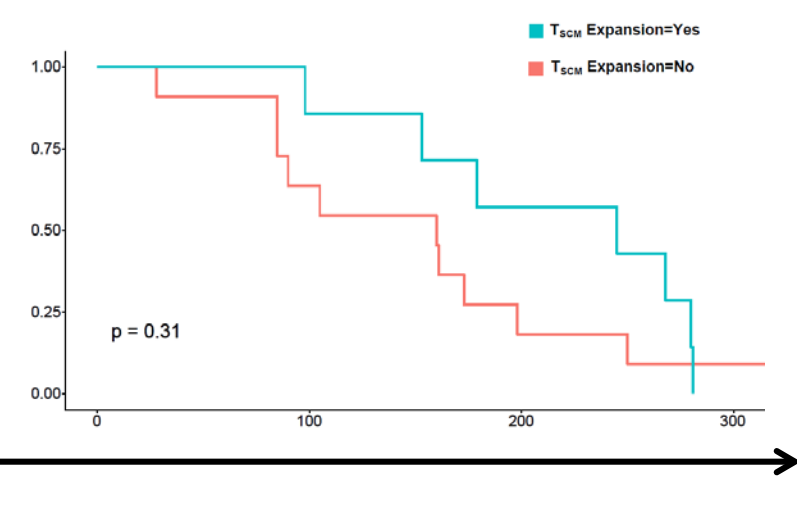**Effector CD8+**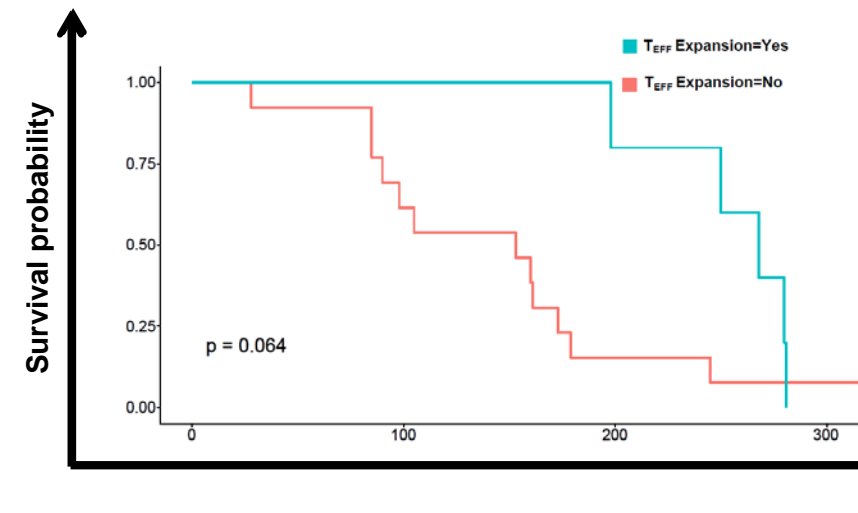**Effector Memory CD8+**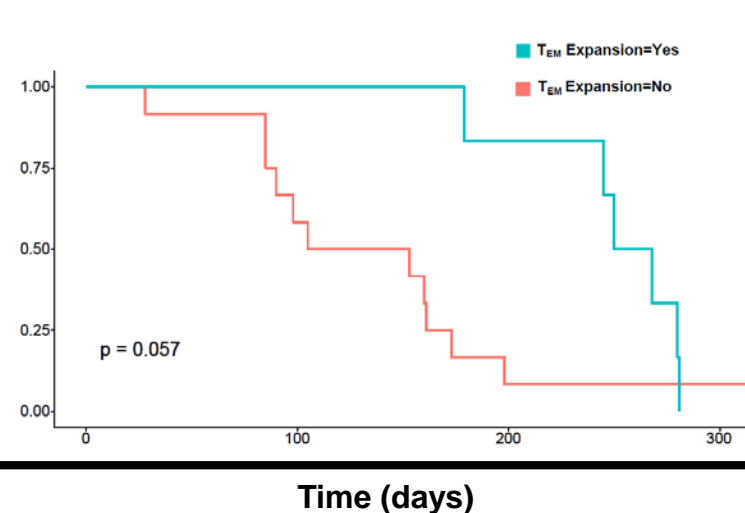**Exhausted CD8+**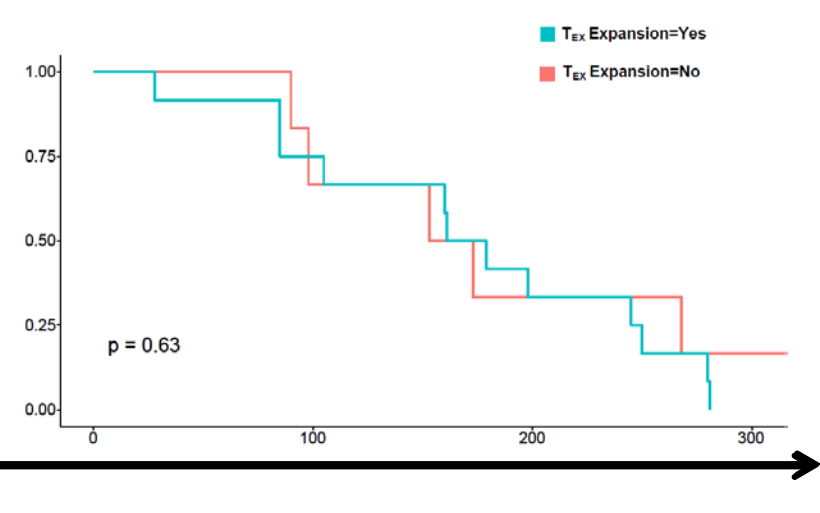

**Figure S7**

**Kaplan-Meier survival curves visualizing OS among stratum A patients based on the expansion of H3.3K27M-reactive CD8<sup>+</sup> T-cell subpopulations.**

Overall CD8+

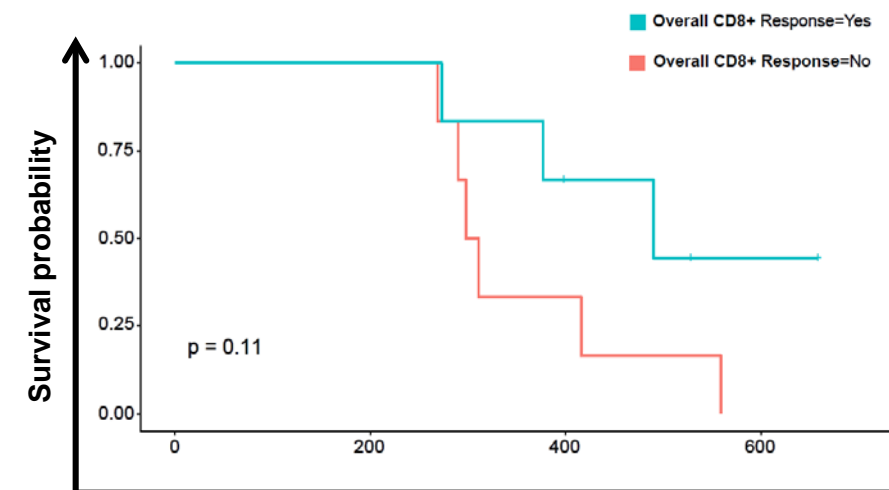

Early Activated CD8+

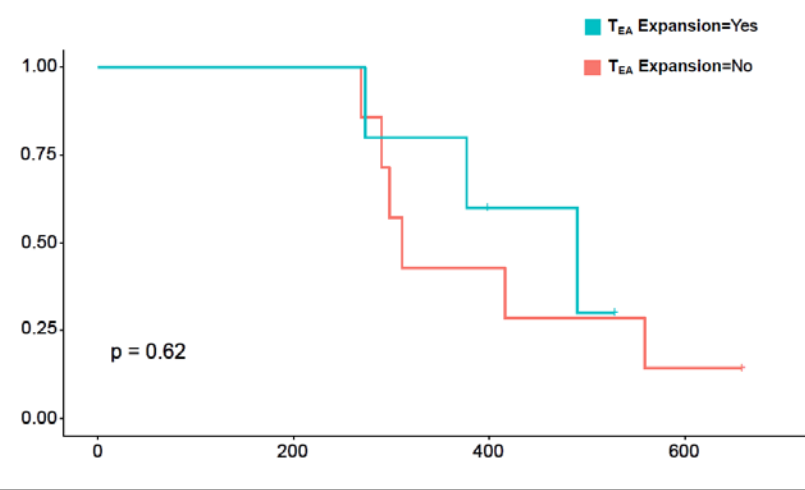

Stem Cell Memory CD8+

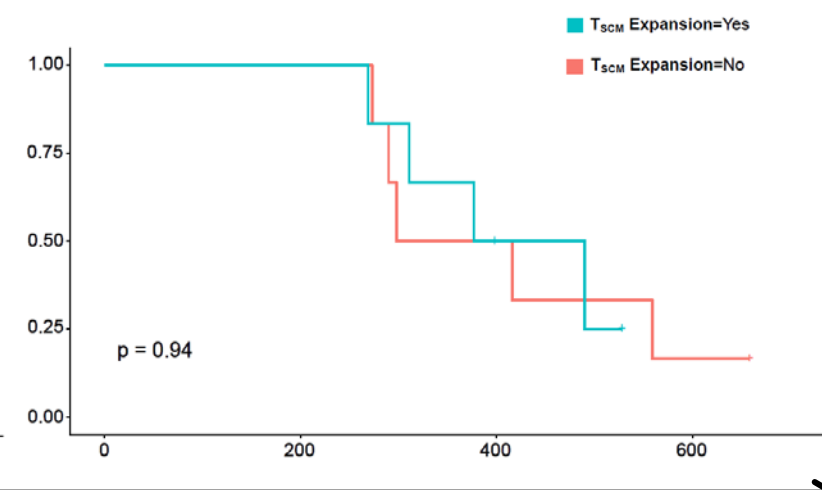

Time (days)

Effector CD8+

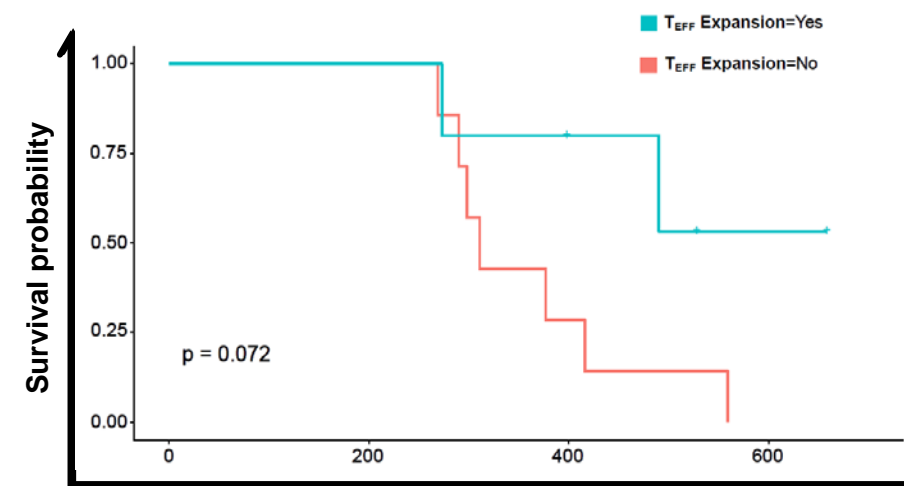

Effector Memory CD8+

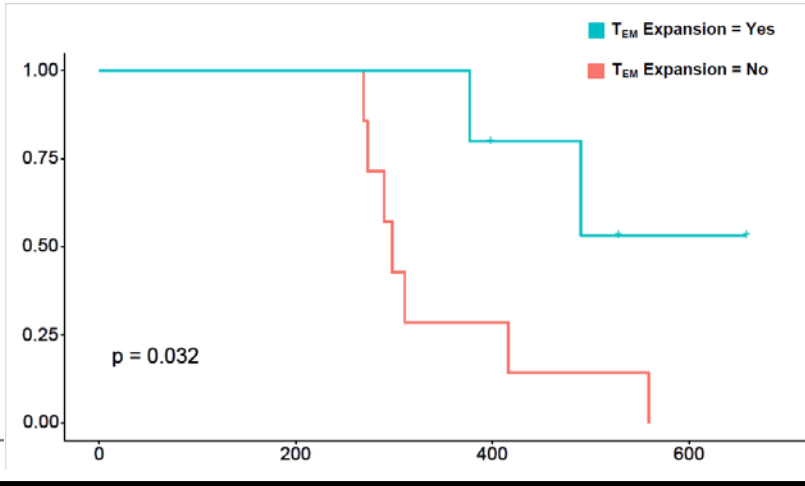

Exhausted CD8+

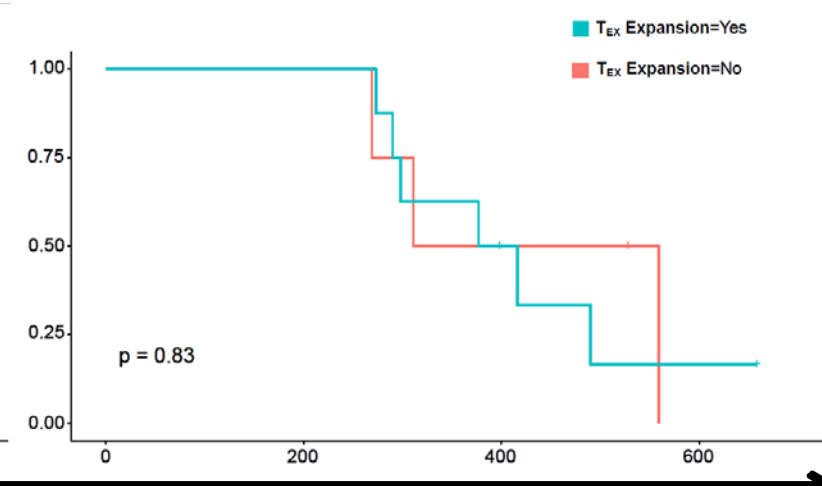

Time (days)

**Figure S8**

**Kaplan-Meier survival curves visualizing PFS among stratum A patients based on the expansion of H3.3K27M-reactive CD8+ T-cell subpopulations.**

**Overall CD8+**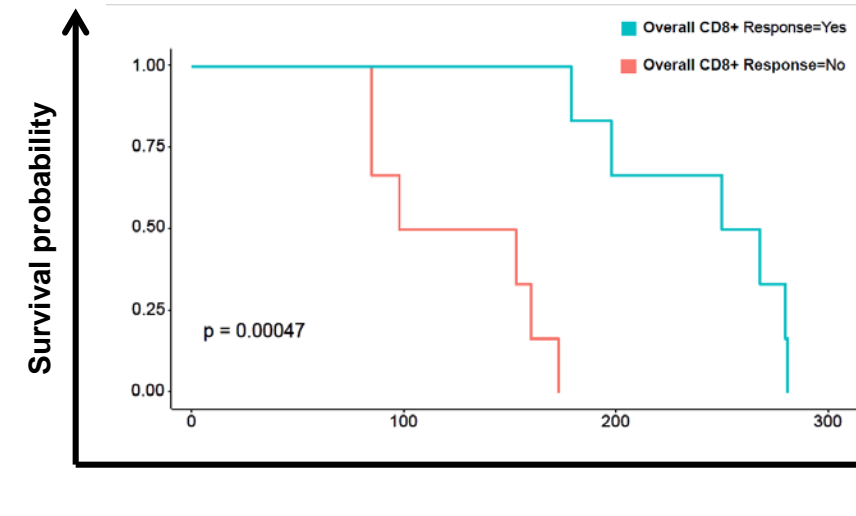**Early Activated CD8+**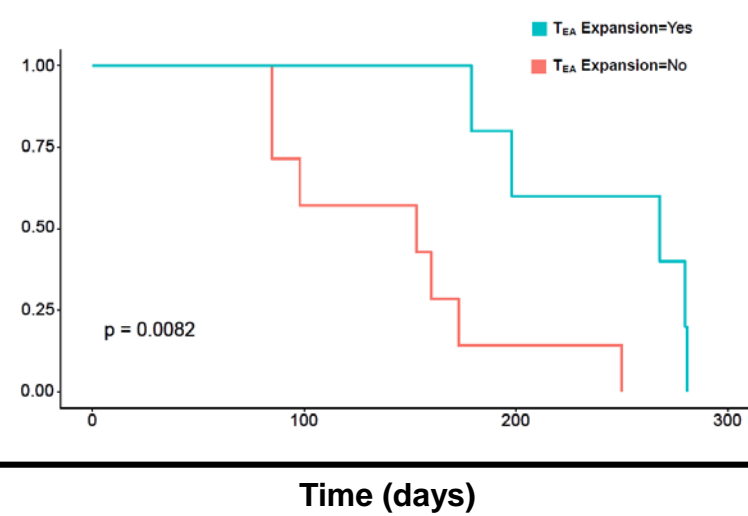**Stem Cell Memory CD8+**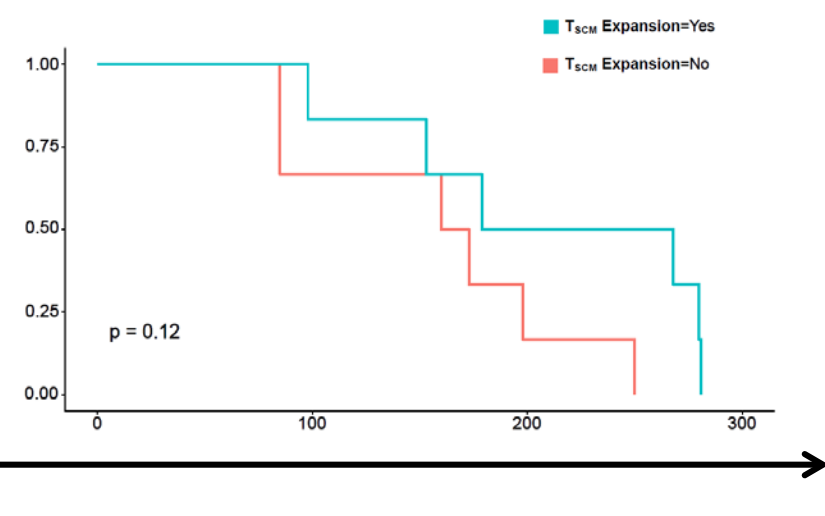**Effector CD8+**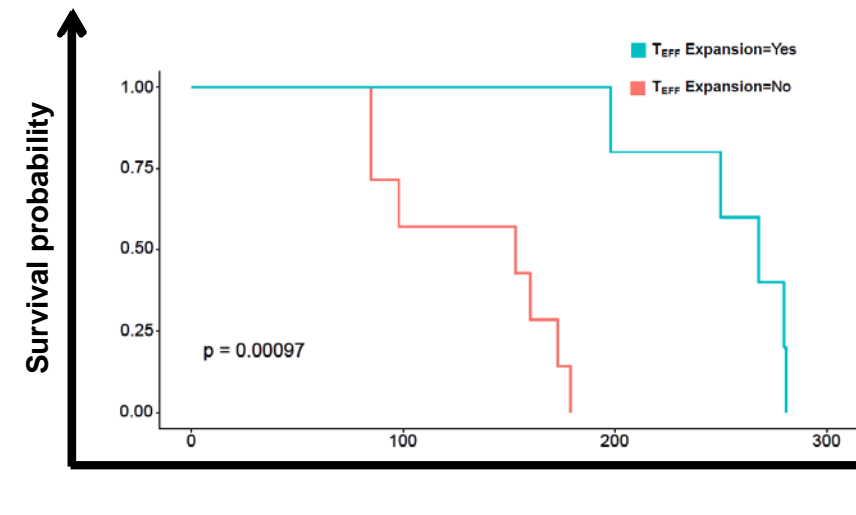**Effector Memory CD8+**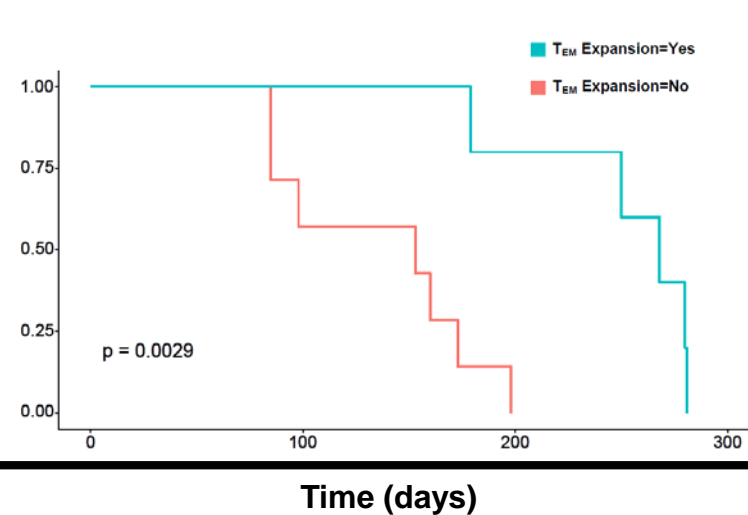**Exhausted CD8+**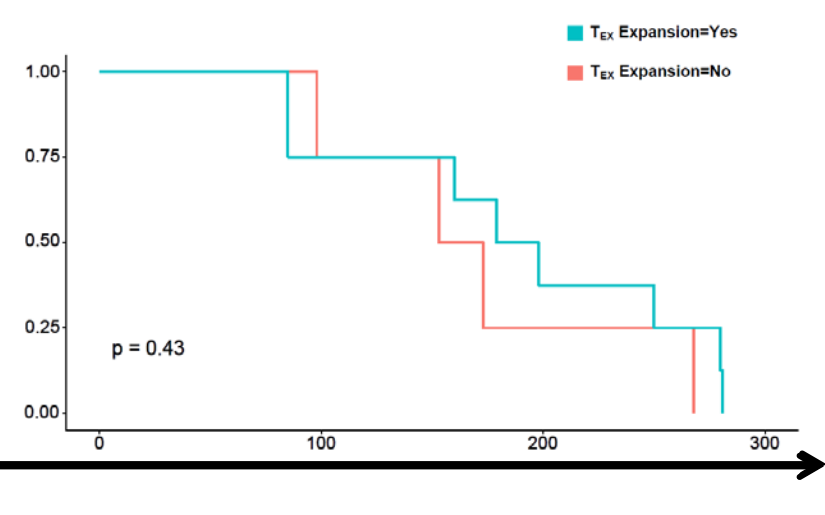

**Figure S9**

**Kaplan-Meier survival curves visualizing OS among strata A + B patients based on the expansion of bulk CD8<sup>+</sup> T-cell subpopulations.**

**Early Activated CD8+**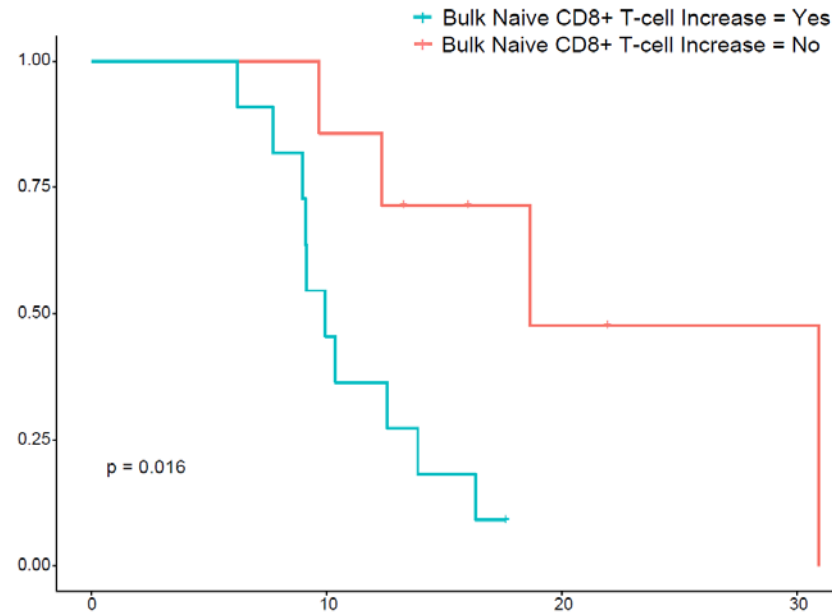**Stem Cell Memory CD8+**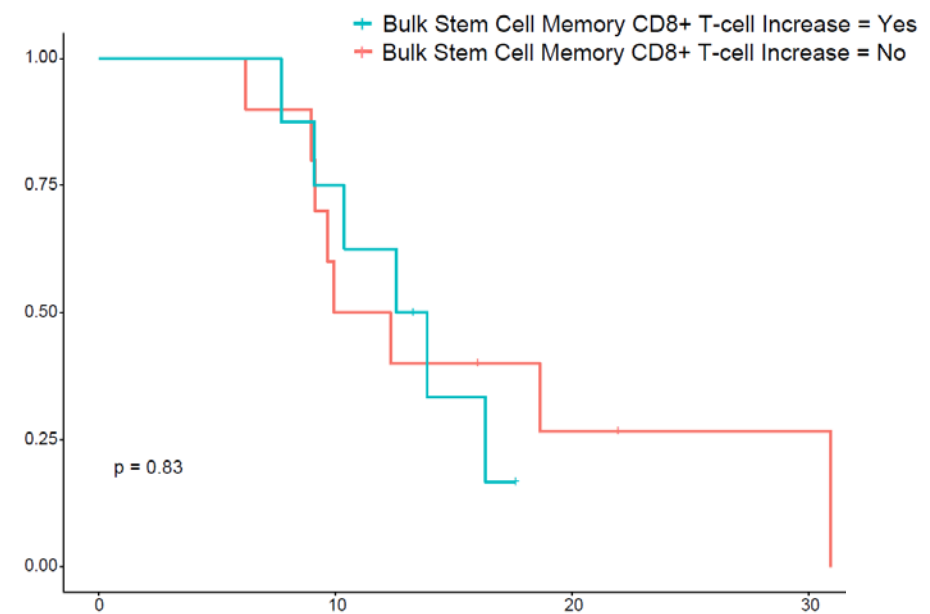**Effector CD8+**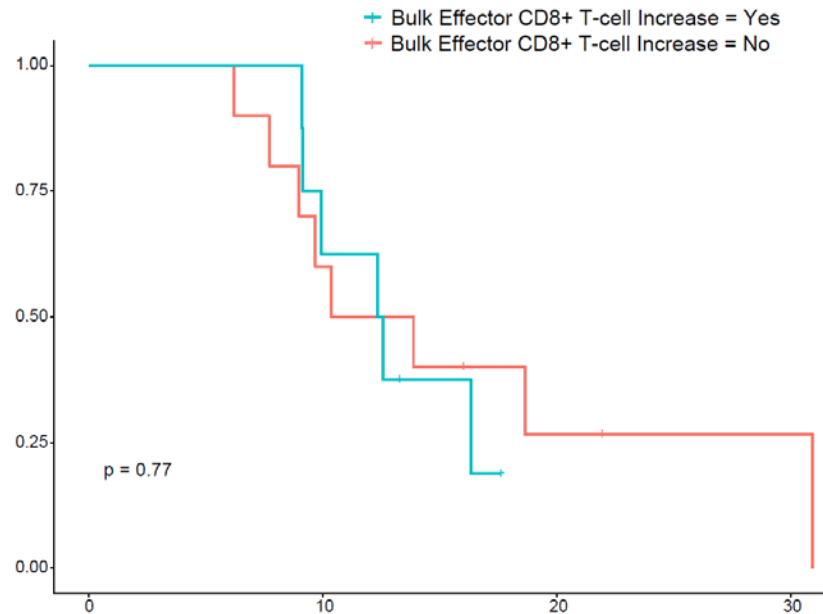**Effector Memory CD8+**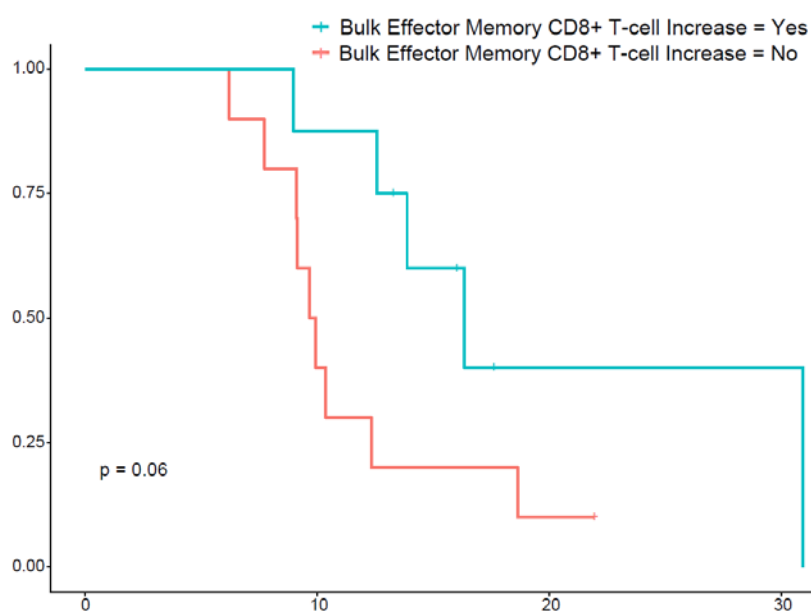**Exhausted CD8+**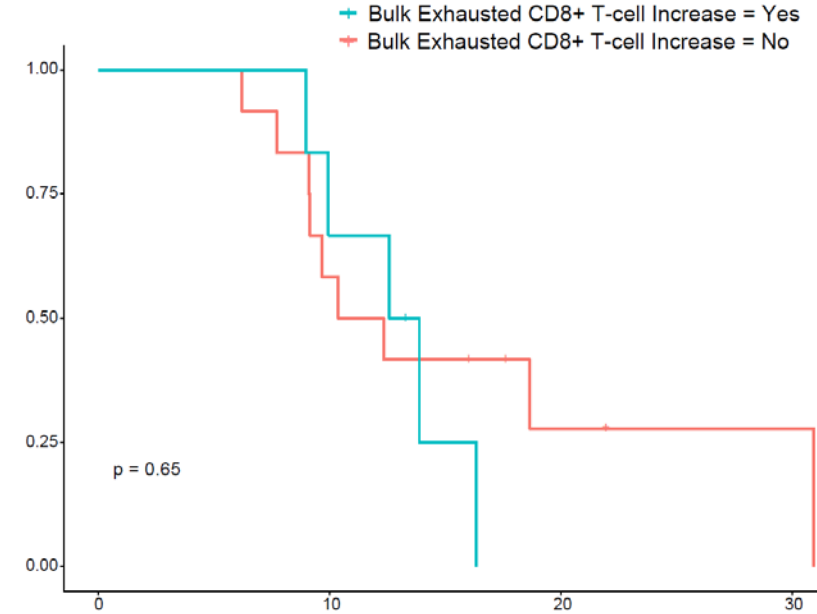

**Figure S10**

**Kaplan-Meier survival curves visualizing PFS among strata A + B patients based on the expansion of bulk CD8+ T-cell subpopulations.**

**Early Activated CD8+**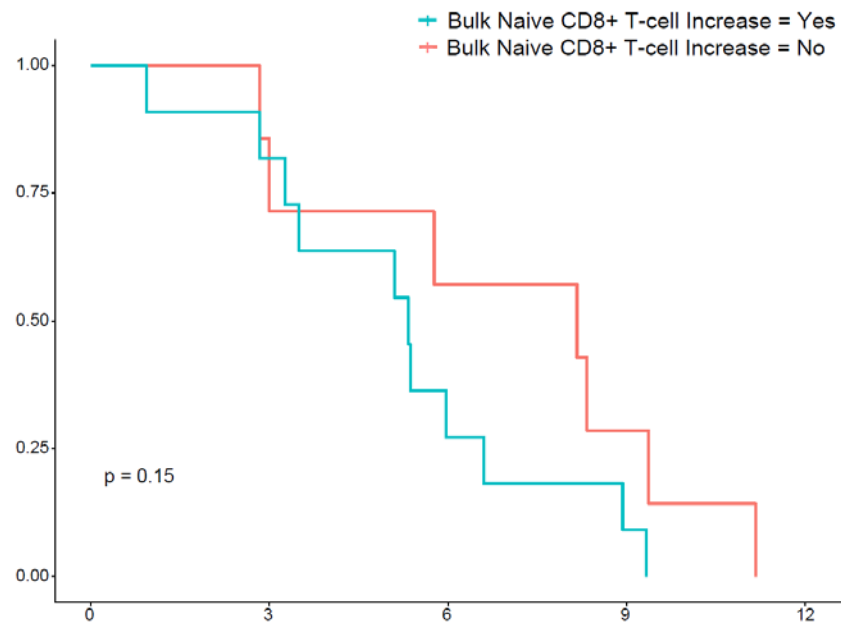**Stem Cell Memory CD8+**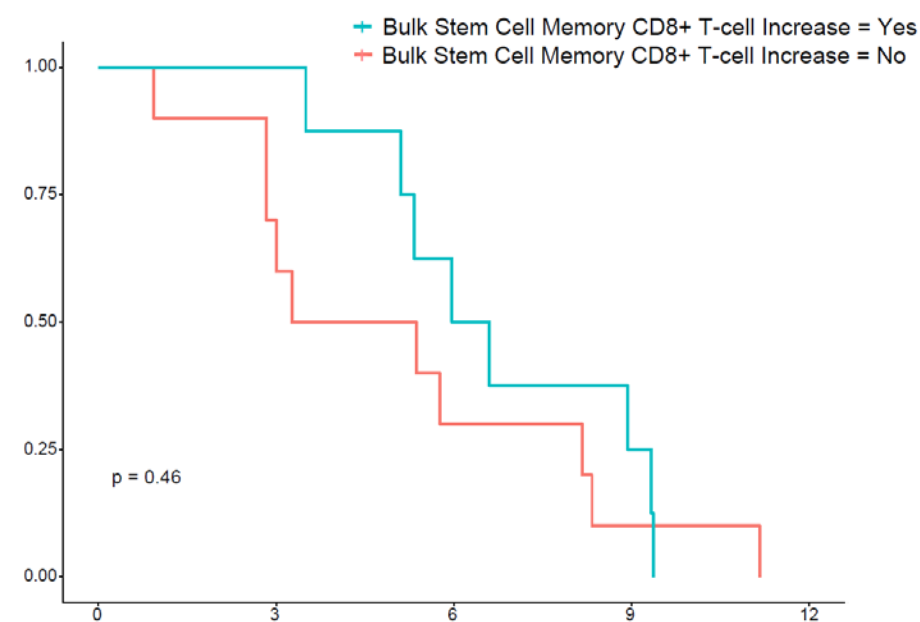**Effector CD8+**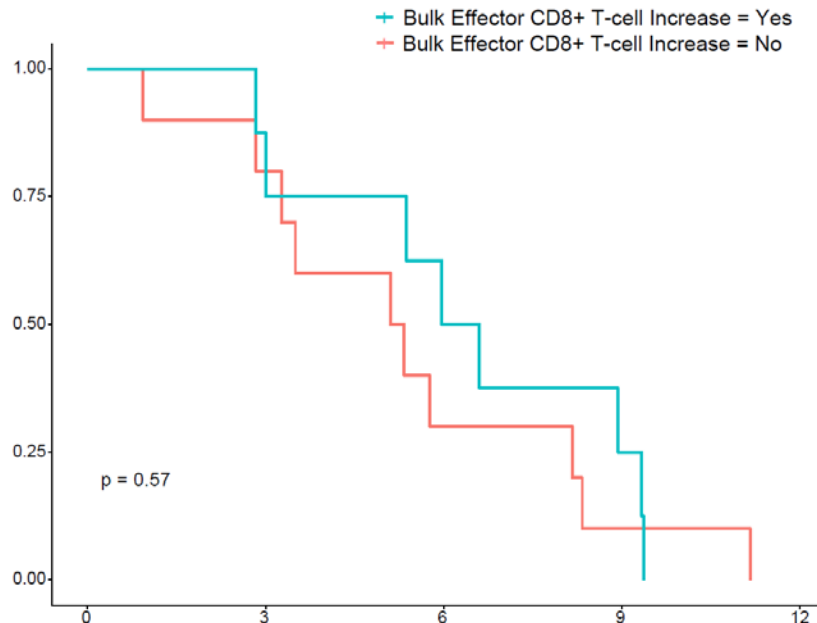**Effector Memory CD8+**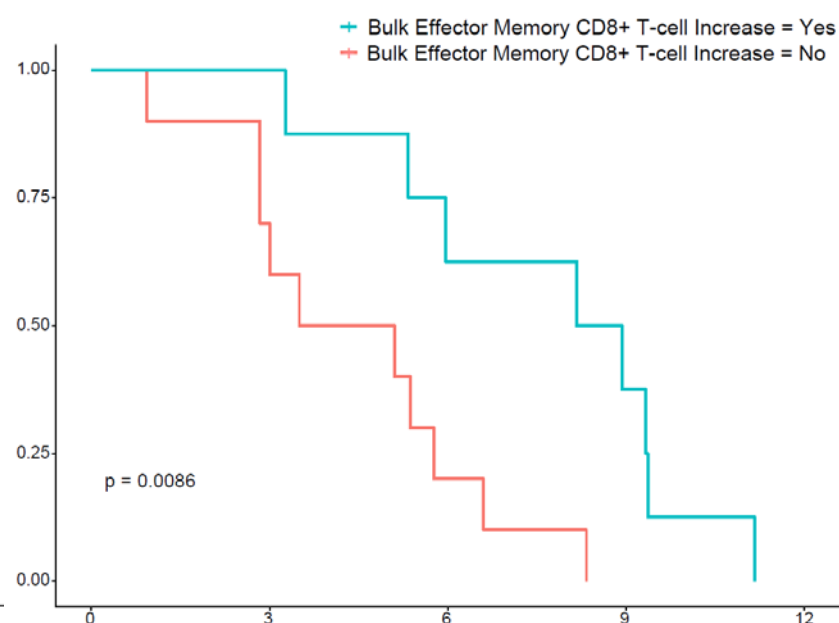**Exhausted CD8+**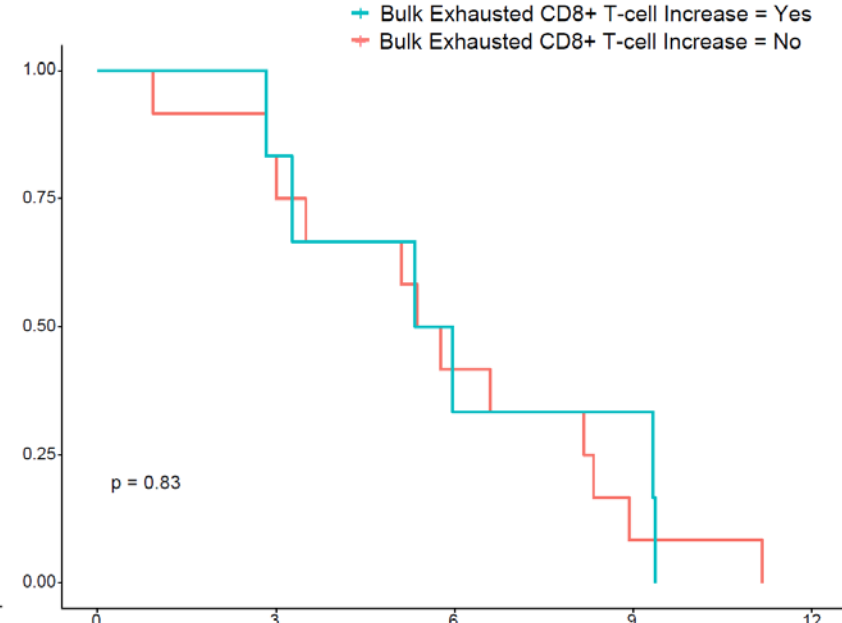

**Figure S11**

**Kaplan-Meier survival curves visualizing OS among stratum A patients based on the expansion of bulk CD8+ T-cell subpopulations.**

**Early Activated CD8+**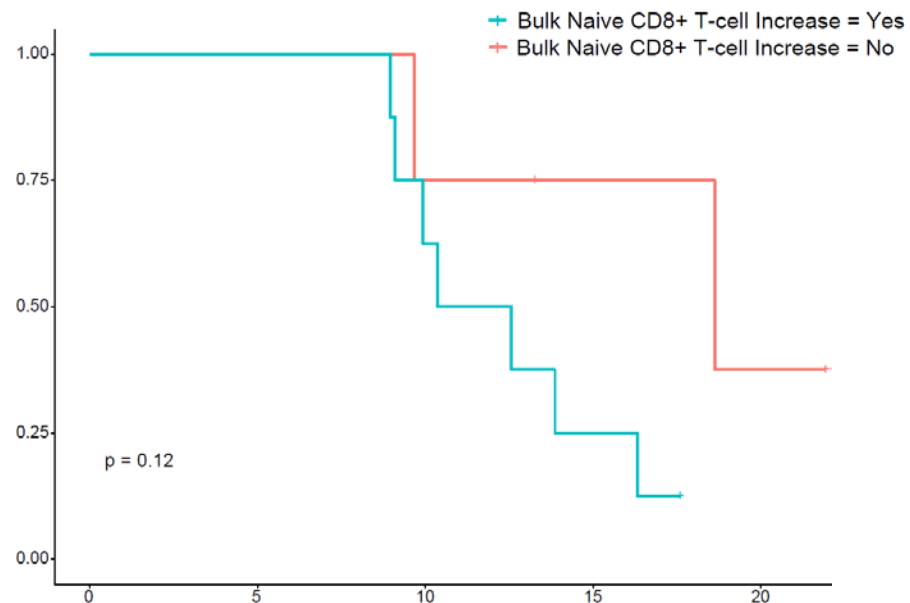**Stem Cell Memory CD8+**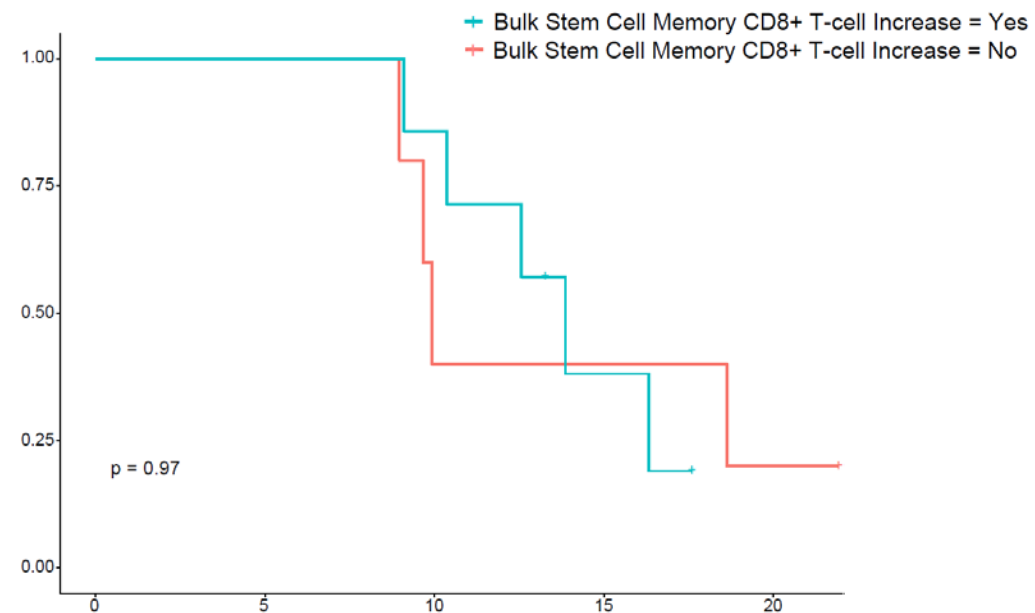**Effector CD8+**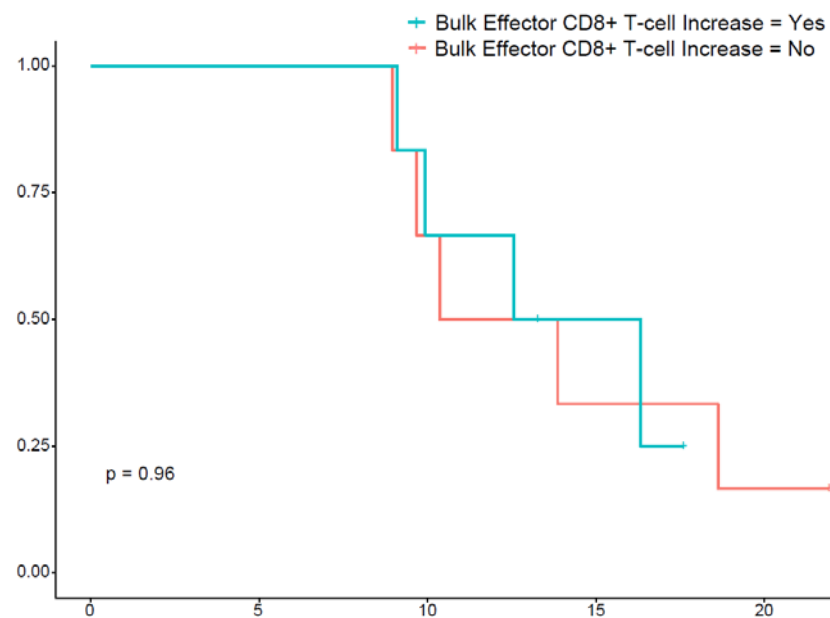**Effector Memory CD8+**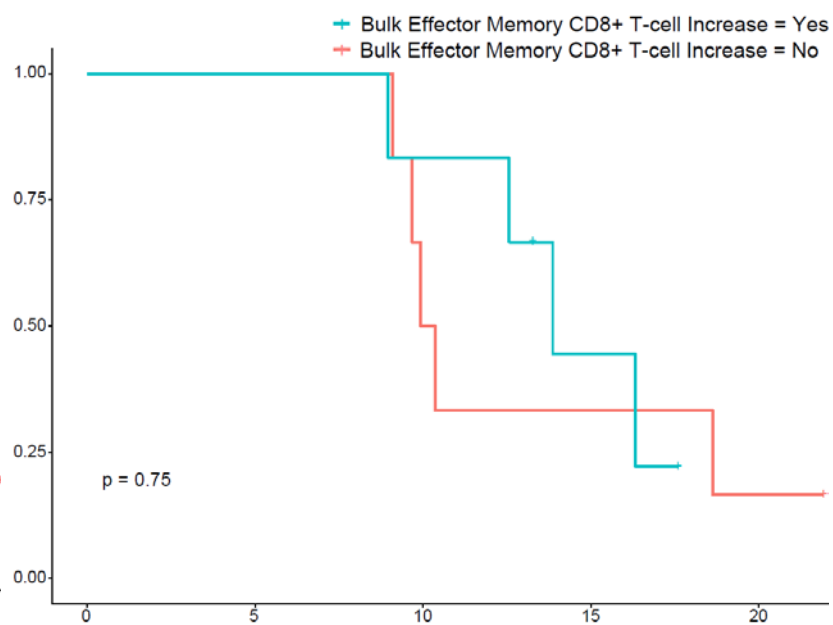**Exhausted CD8+**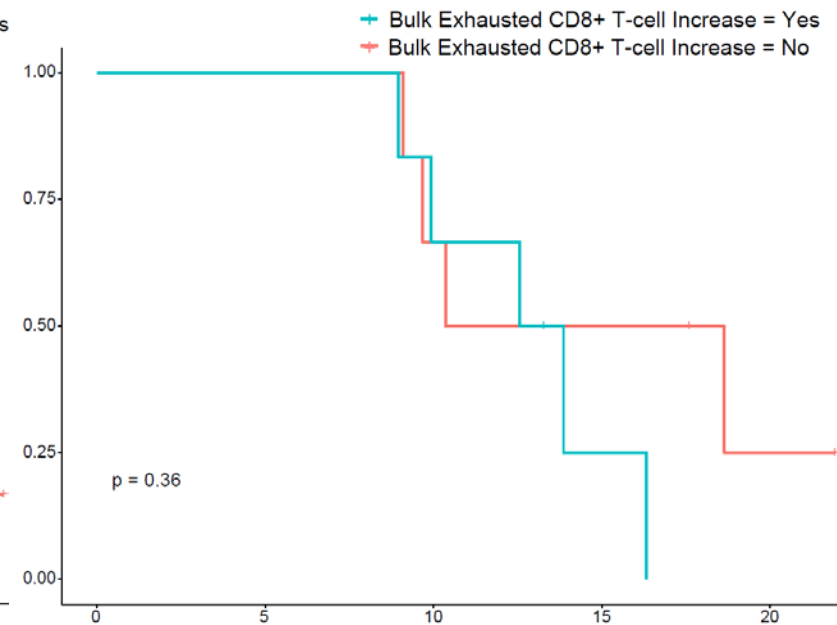

**Figure S12**

**Kaplan-Meier survival curves visualizing PFS among stratum A patients based on the expansion of bulk CD8<sup>+</sup> T-cell subpopulations.**

**Early Activated CD8+**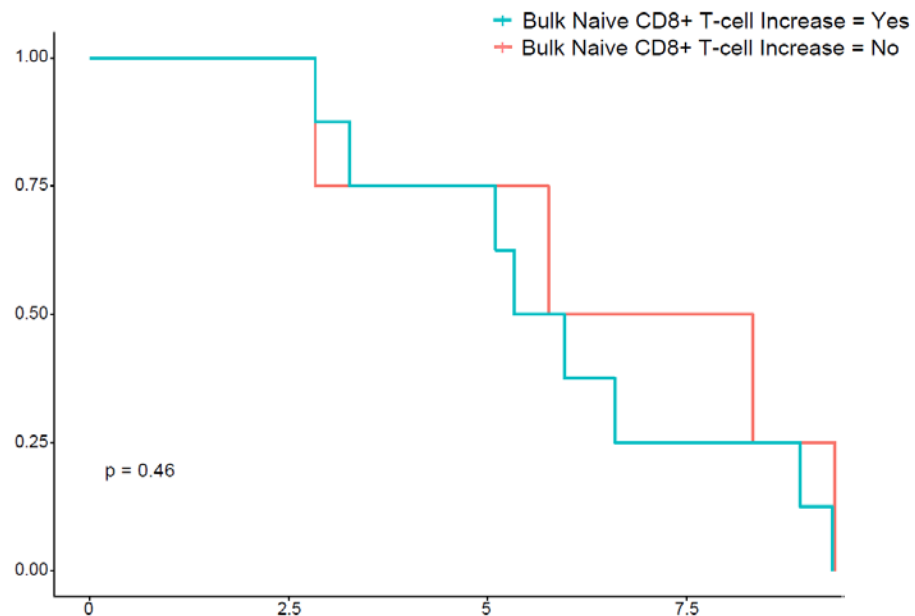**Stem Cell Memory CD8+**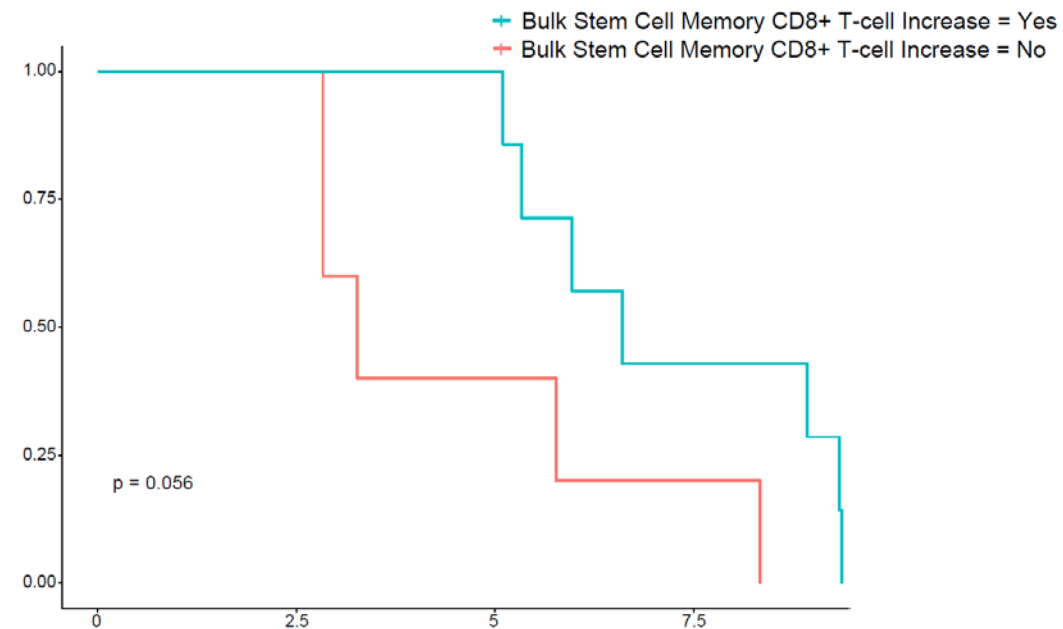**Effector CD8+**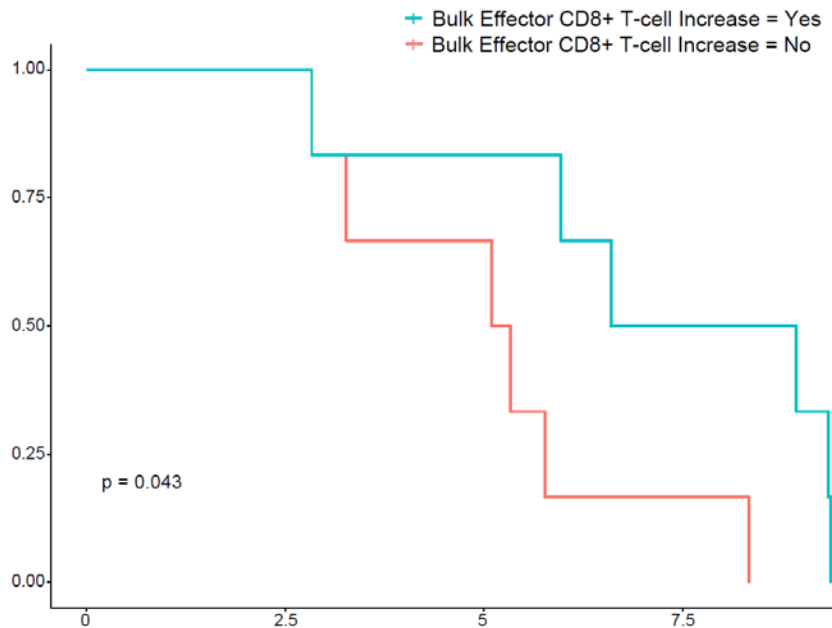**Effector Memory CD8+**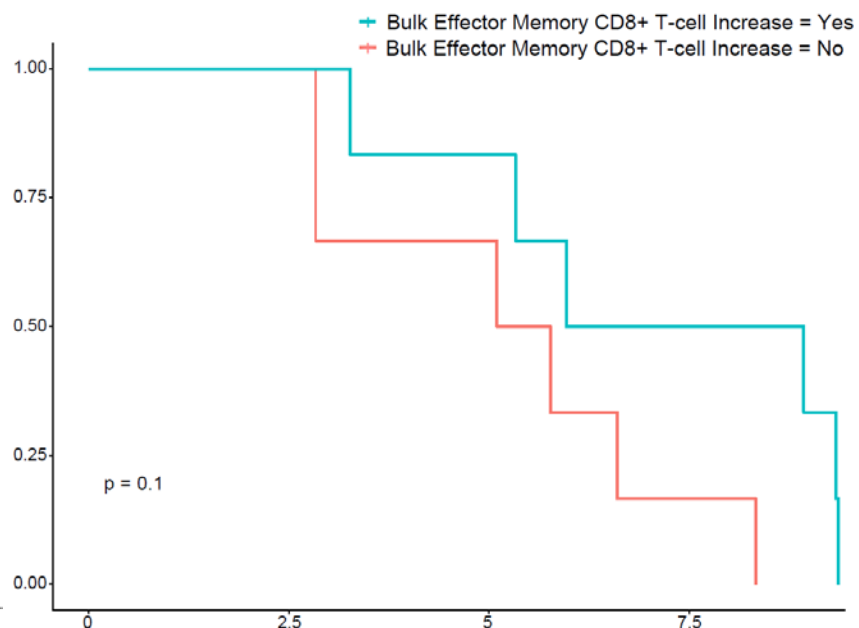**Exhausted CD8+**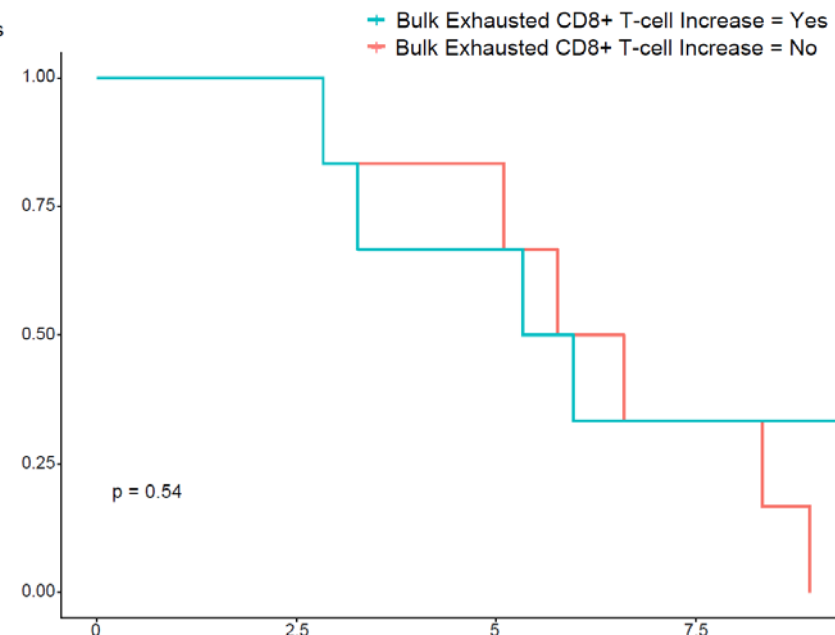

### **Figure S13**

**Linear model correlating the relationship between number of vaccines administered and relative percent change of H3.3K27M-reactive CD8+ T-cells utilizing Spearman correlation coefficient. Models both with and without outlier patient exhibiting greatest H3.3K27M-reactive CD8+ T-cell expansion (PNOC007-25) reveal significant correlation.**

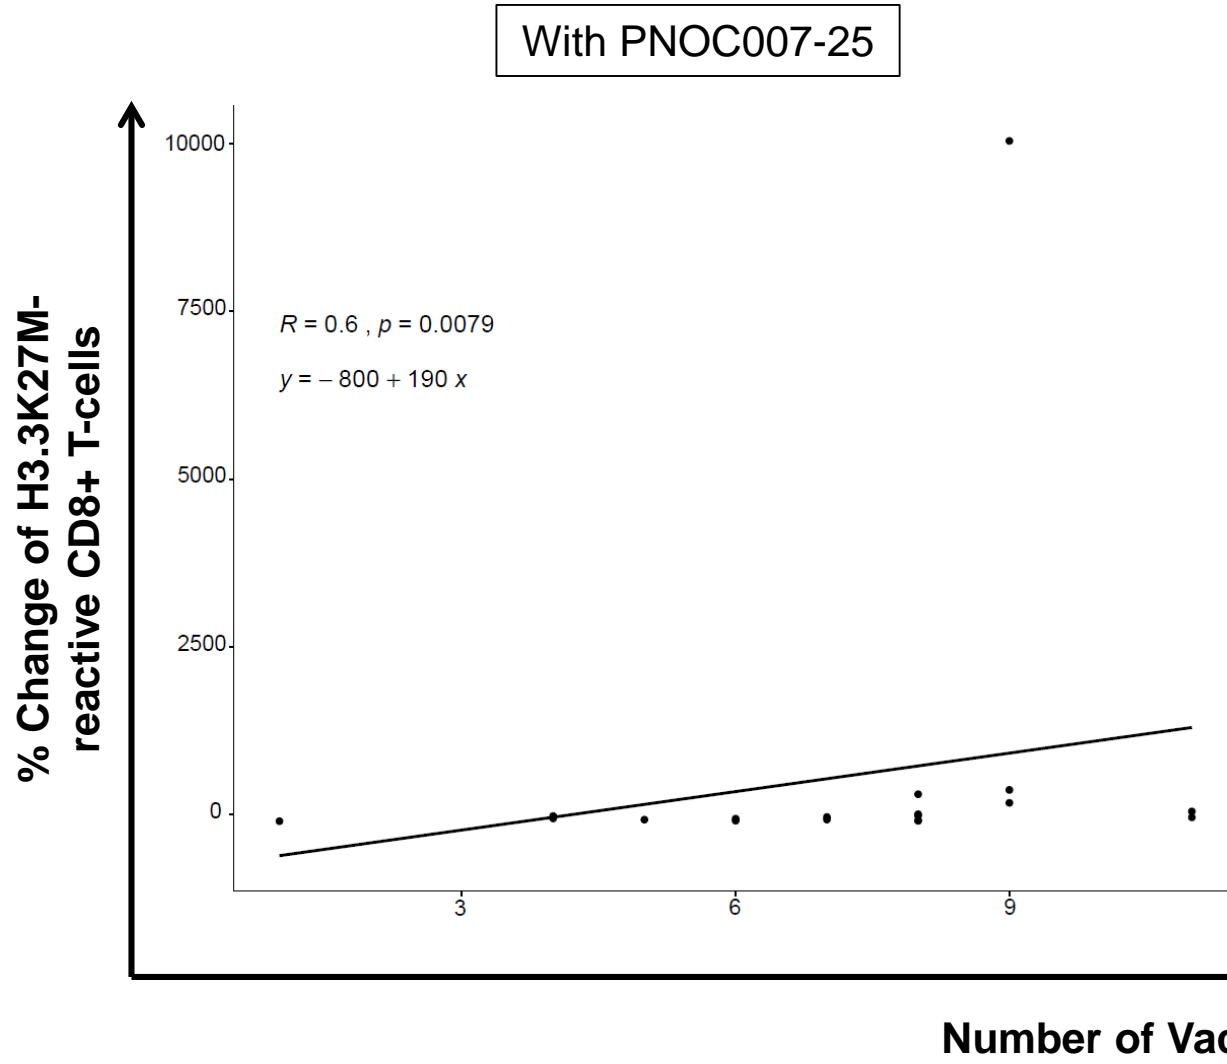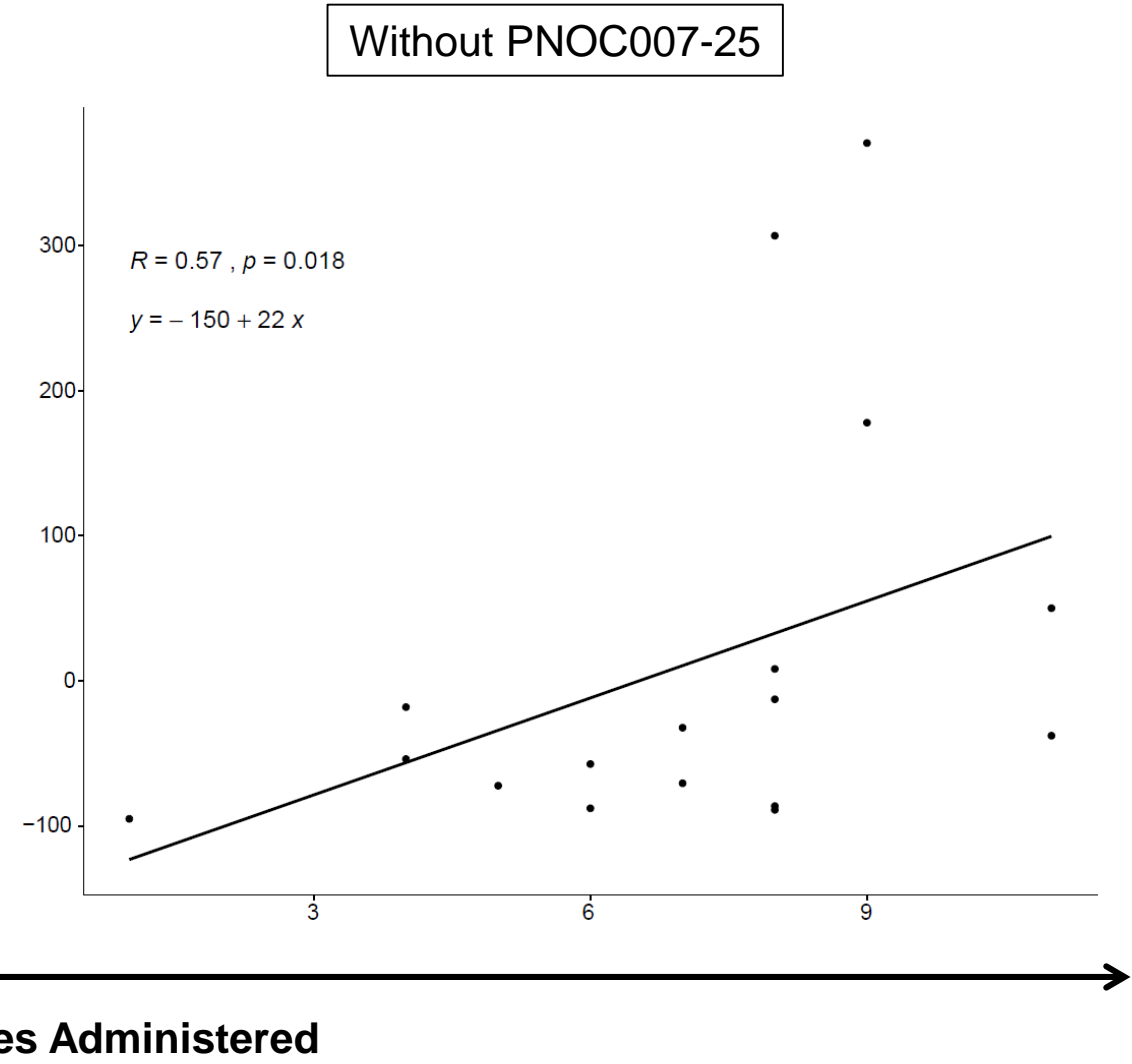

### **Figure S14**

#### **tSNE stratification and expression profiles of discrete myeloid subpopulations.**

*Left*, patient-derived myeloid cells were stratified on a tSNE plot using the myeloid canonical markers: CD33, CD11b, CD11c, CD14, CD15 and CD16. *Right*, heat map visualizing the z-score normalized expression of resultant myeloid cell clusters.

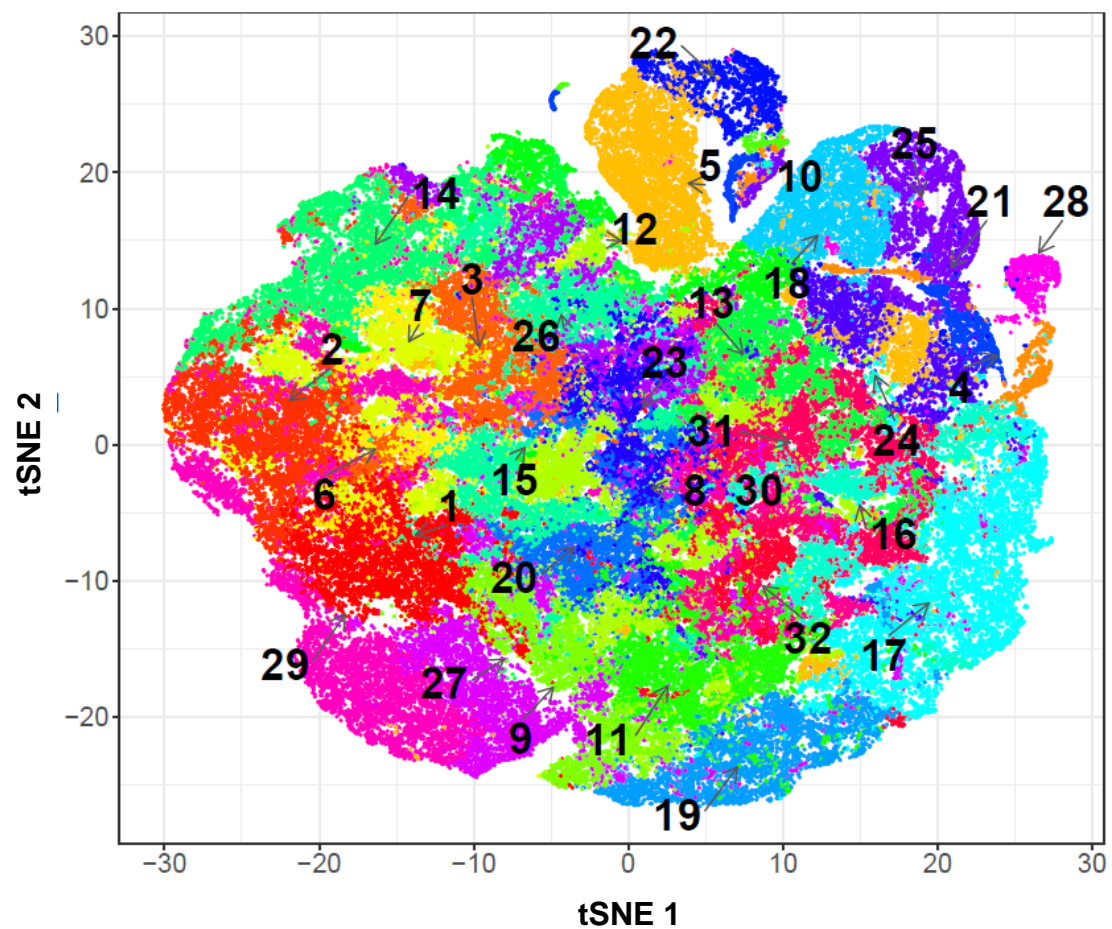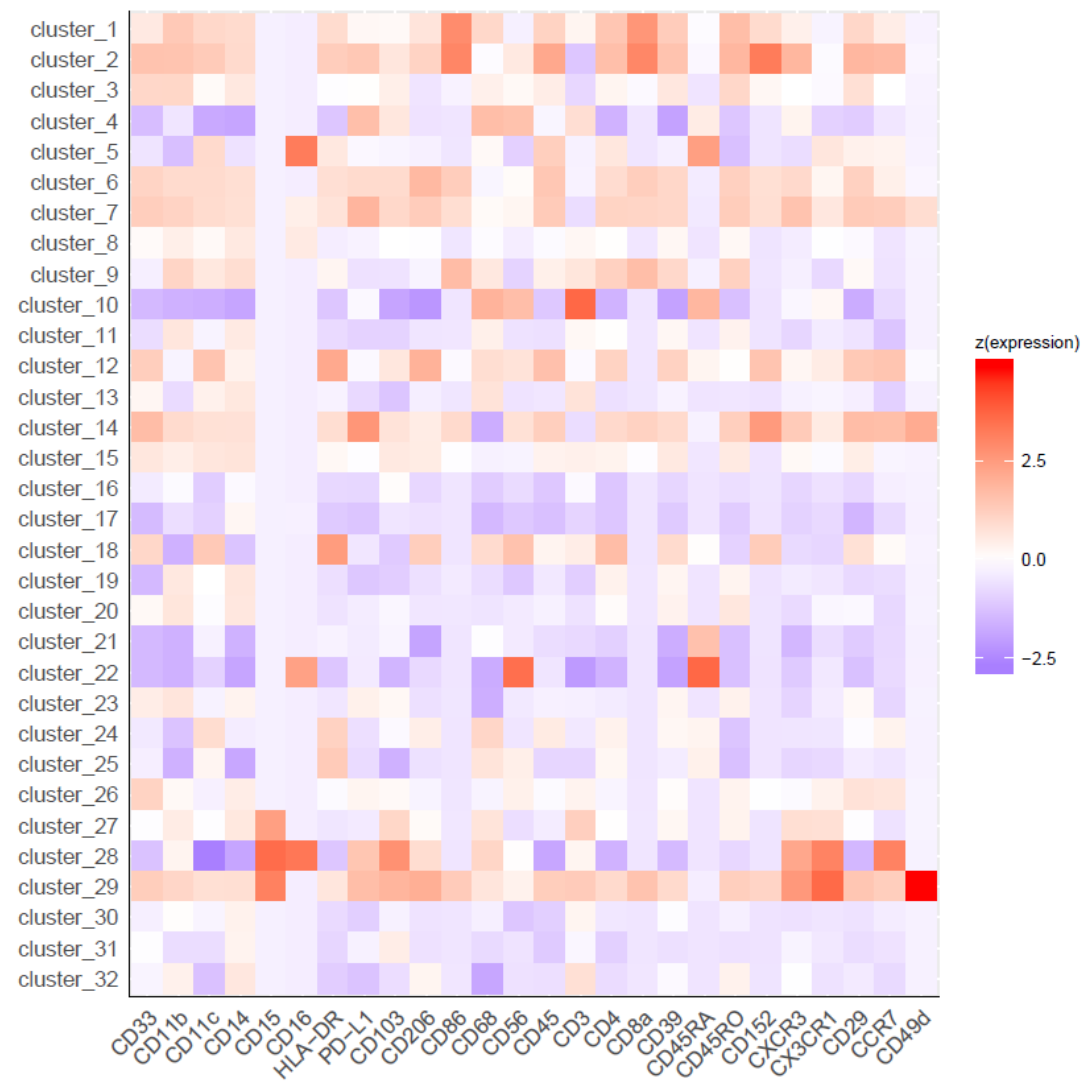

**Table S2**

**CytoF-based marker expression profiles and MDSC phenotypic characterizations of myeloid cell clusters identified via tSNE stratification.**

| Cluster Number | Phenotype                                                                                                |
|----------------|----------------------------------------------------------------------------------------------------------|
| 1              | CD33+ CD11b+ CD14+ CD86+ CD68 <sup>hi</sup>                                                              |
| 2              | CD33+ CD11b+ CD14+ CD86+ CD68 <sup>mid</sup>                                                             |
| 3              | CD33+ CD11b+ CD11c <sup>mid</sup> CD14+ CD206 <sup>lo</sup> CD68 <sup>mid</sup>                          |
| 4              | Almost all markers low                                                                                   |
| 5              | CD11c+ CD16+ HLA-DR+                                                                                     |
| 6              | CD33+ CD11b+ CD11c+ CD14+ CD206+ HLA-DR <sup>hi</sup>                                                    |
| 7              | CD33+ CD11b+ CD11c+ CD14+ CD16 <sup>hi</sup> HLA-DR <sup>hi</sup>                                        |
| 8              | CD33 <sup>mid</sup> CD11b+ CD11c+ CD14 <sup>hi</sup> CD16 <sup>hi</sup> HLA-DR <sup>lo</sup>             |
| 9              | CD33 <sup>mid</sup> CD11b+ CD11c+ CD14+ HLA-DR <sup>mid</sup> CD206-                                     |
| 10             | Almost all markers low                                                                                   |
| 11             | CD33 <sup>lo</sup> CD11b+ CD11c <sup>mid</sup> CD14 <sup>hi</sup> CD206- CD68+                           |
| 12             | CD33+ CD11c+ HLA-DR+ CD103 <sup>hi</sup> CD206+                                                          |
| 13             | CD33 <sup>hi</sup> CD11b <sup>lo</sup> CD11c <sup>hi</sup> CD14+ HLA-DR <sup>lo</sup> CD68 <sup>hi</sup> |
| 14             | CD33+ CD11b+ CD11c+ CD14+ HLA-DR <sup>hi</sup>                                                           |
| 15             | CD33+ CD11b+ CD11c+ CD14+ HLA-DR <sup>mid-hi</sup> CD103 <sup>hi</sup> CD206 <sup>hi</sup>               |
| 16             | CD33 <sup>mid</sup> CD11b <sup>mid</sup> CD14 <sup>lo</sup> HLA-DR <sup>lo</sup>                         |
| 17             | CD11b <sup>lo</sup> CD14 <sup>hi</sup> HLA-DR-                                                           |
| 18             | CD33+ CD11c+ CD206+ HLA-DR+                                                                              |
| 19             | CD11b+ CD11c <sup>mid</sup> CD14+                                                                        |
| 20             | CD33+ CD11b+ CD11c <sup>mid</sup> CD14 <sup>hi</sup> HLA-DR <sup>lo</sup>                                |
| 21             | CD11c <sup>mid</sup> HLA-DR <sup>mid</sup> CD103 <sup>mid</sup> CD68 <sup>mid</sup>                      |
| 22             | CD11c <sup>lo</sup> CD16+ HLA-DR-                                                                        |
| 23             | CD33+ CD11b+ CD14+ HLA-DR-                                                                               |
| 24             | CD11c+ HLA-DR+ CD206 <sup>hi</sup>                                                                       |
| 25             | CD11c+ HLA-DR+ CD68 <sup>hi</sup>                                                                        |
| 26             | CD33+ CD11b+ CD14+ HLA-DR <sup>mid-lo</sup>                                                              |
| 27             | CD33+ CD11b+ CD11c <sup>mid</sup> CD15+ HLA-DR <sup>lo</sup>                                             |
| 28             | CD11b+ CD15+ CD16+ HLA-DR <sup>lo</sup>                                                                  |
| 29             | CD33+ CD11b+ CD11c <sup>hi</sup> CD15+ HLA-DR <sup>hi</sup> CD103+                                       |
| 30             | CD33 <sup>lo</sup> CD11b <sup>mid</sup> CD14 <sup>hi</sup> HLA-DR <sup>lo</sup>                          |
| 31             | CD33 <sup>mid</sup> CD11b <sup>lo</sup> CD14 <sup>hi</sup> HLA-DR <sup>lo</sup>                          |
| 32             | CD33 <sup>lo</sup> CD11b <sup>hi</sup> CD14 <sup>hi</sup> HLA-DR <sup>lo</sup>                           |

#### Color Key

E-MDSC

M-MDSC

**Figure S15**

**Kaplan-Meier survival curves visualizing OS and PFS among strata A + B patients based on the abundance of circulatory MDSC subtypes at baseline.**

OS:

E-MDSCs

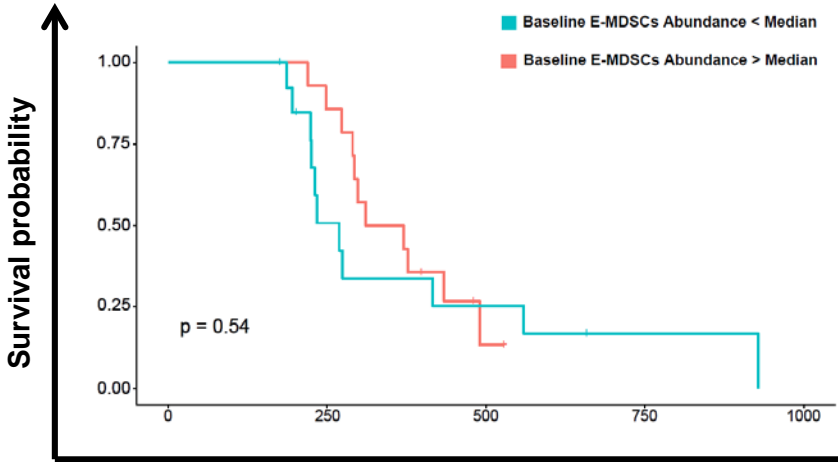

M-MDSCs

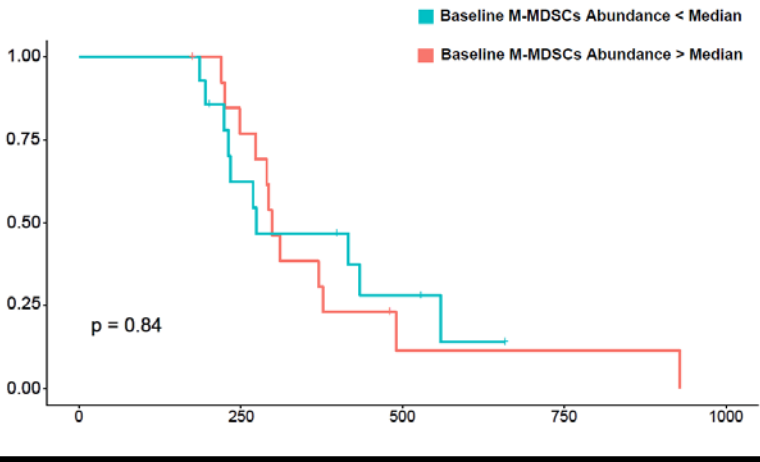

Total MDSCs

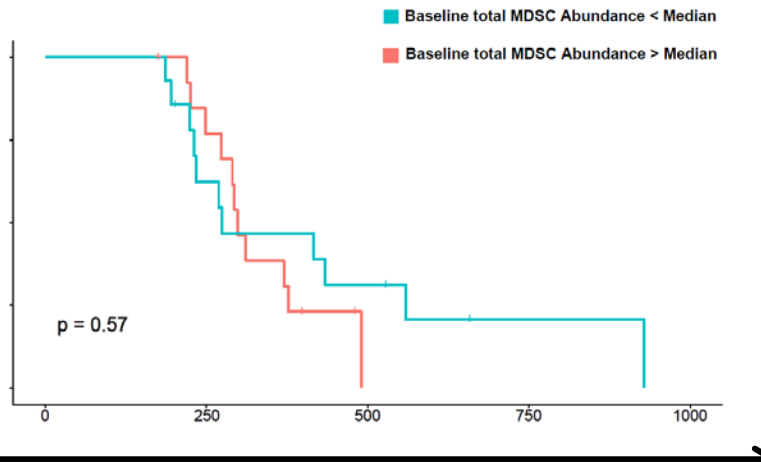

PFS:

E-MDSCs

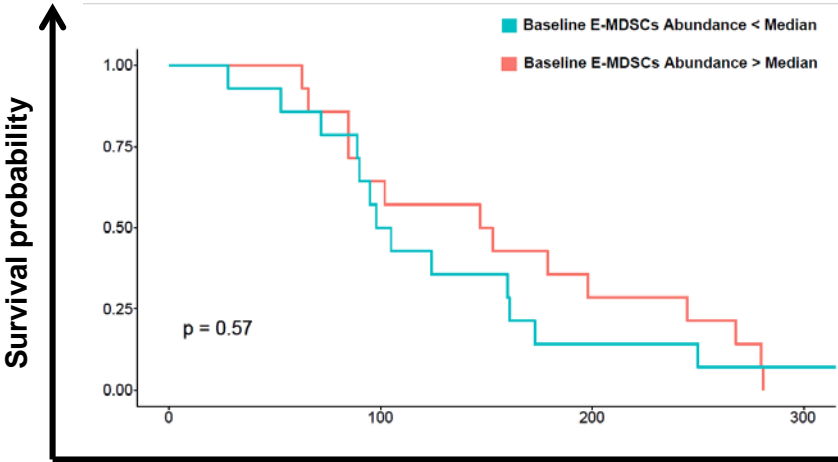

M-MDSCs

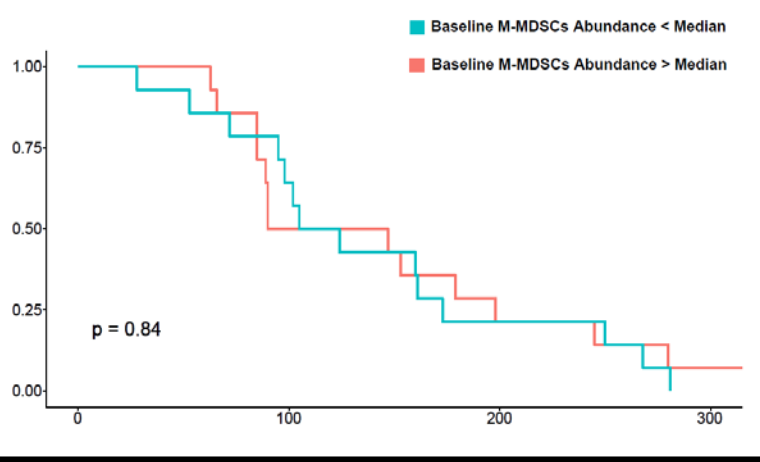

Total MDSCs

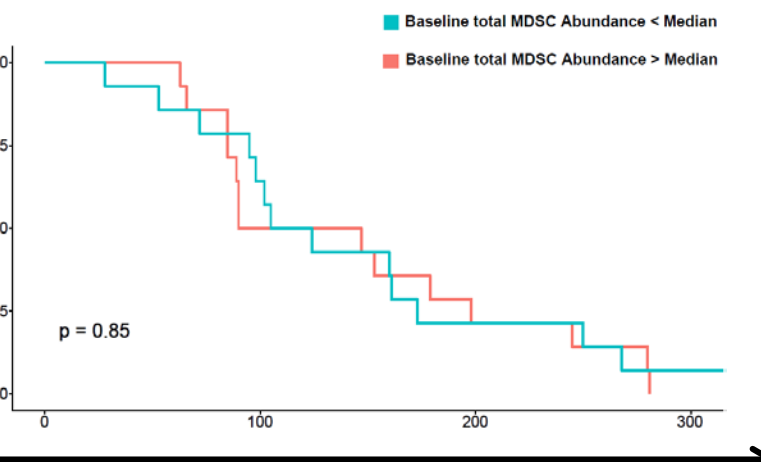

**Figure S16**

**Kaplan-Meier survival curves visualizing OS and PFS among stratum A patients based on the abundance of circulatory MDSC subtypes at baseline.**

OS:

E-MDSCs

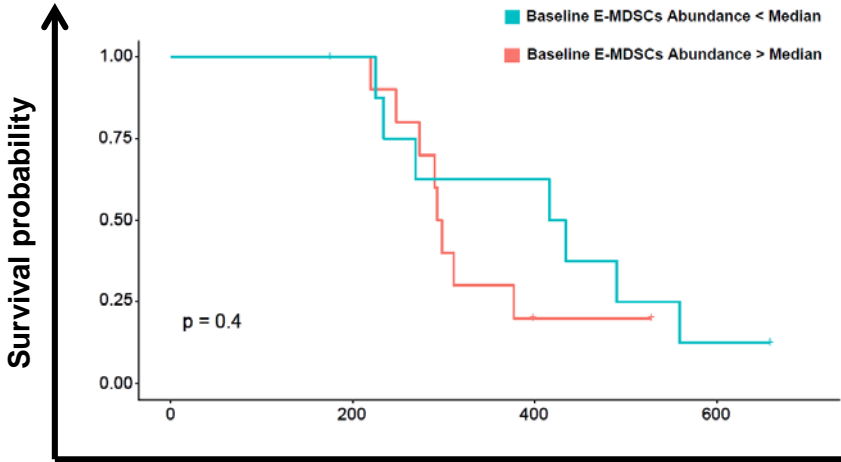

M-MDSCs

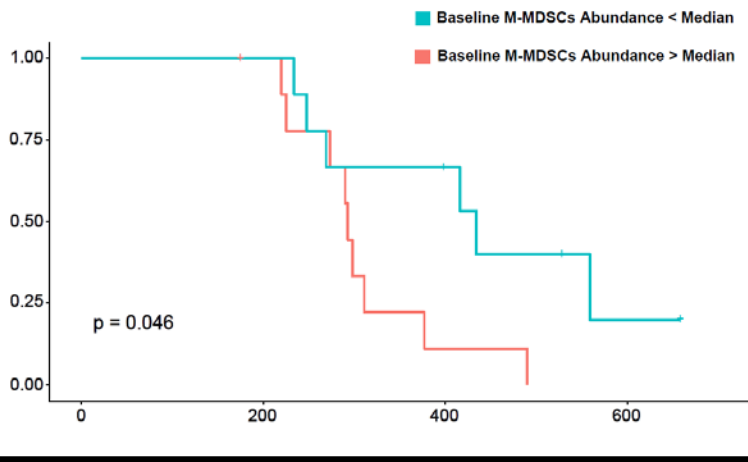

Total MDSCs

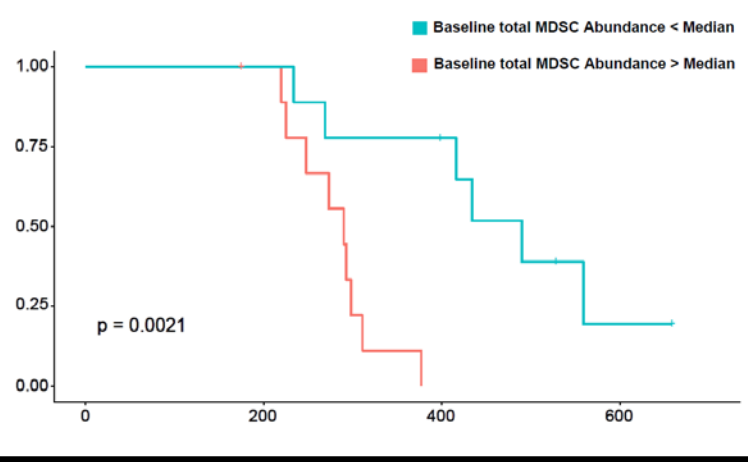

PFS:

E-MDSCs

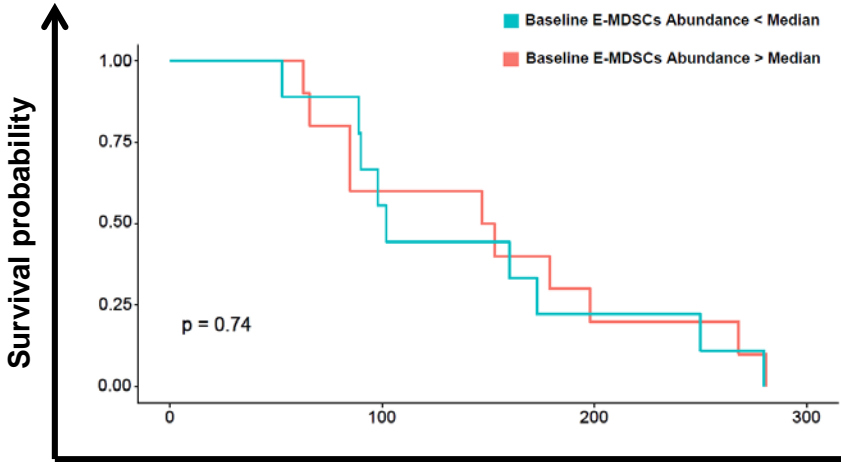

M-MDSCs

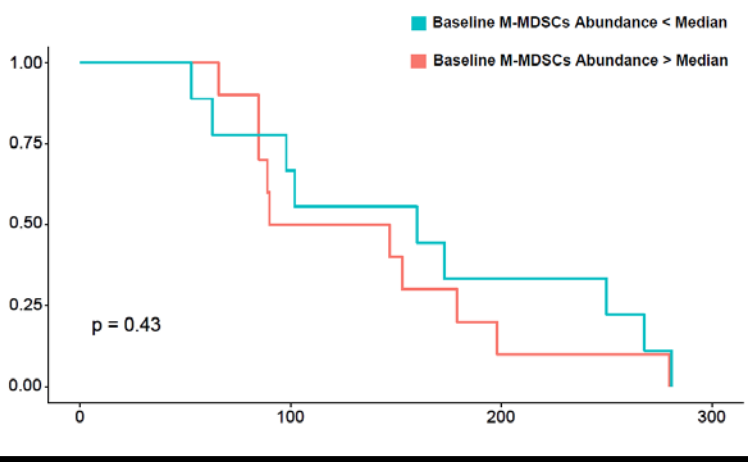

Total MDSCs

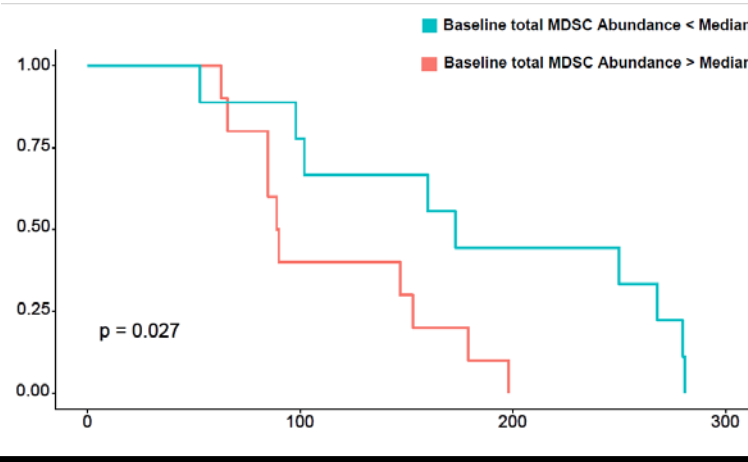

**Figure S17**

**Kaplan-Meier survival curves visualizing OS of strata A+B and stratum A patients with MDSC abundances in upper and lower quartile of their respective cohorts**

### Strata A + B Patients

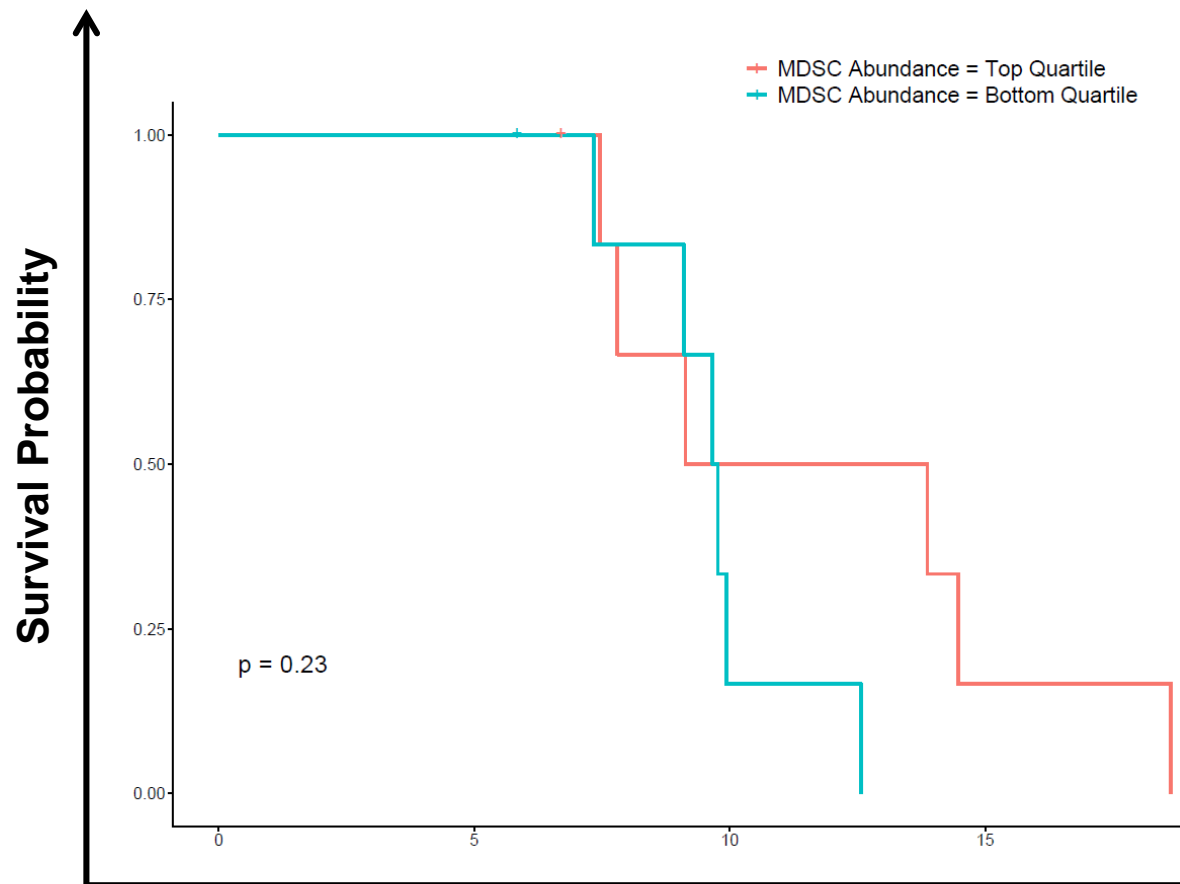

### Stratum A Patients

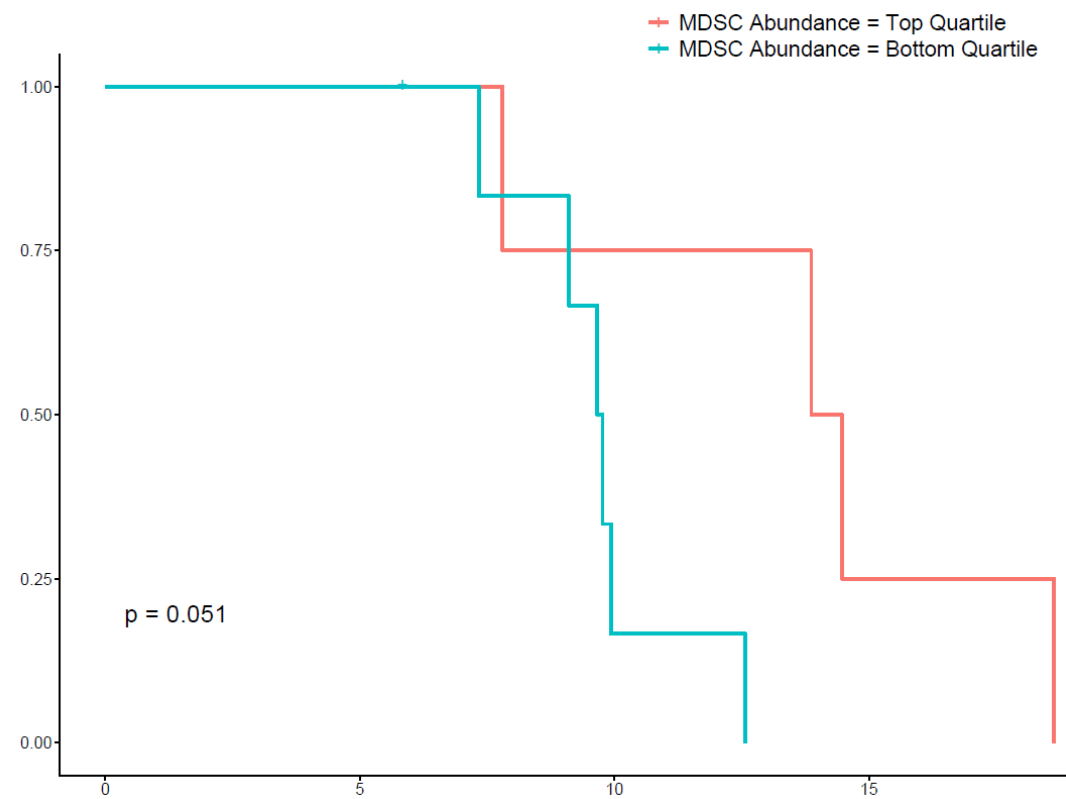

Time (months)

**Figure S18**

**Linear models correlating baseline tumor volume and age with baseline MDSC abundance utilizing Spearman and Pearson correlation methods**

**Pearson product moment correlation**

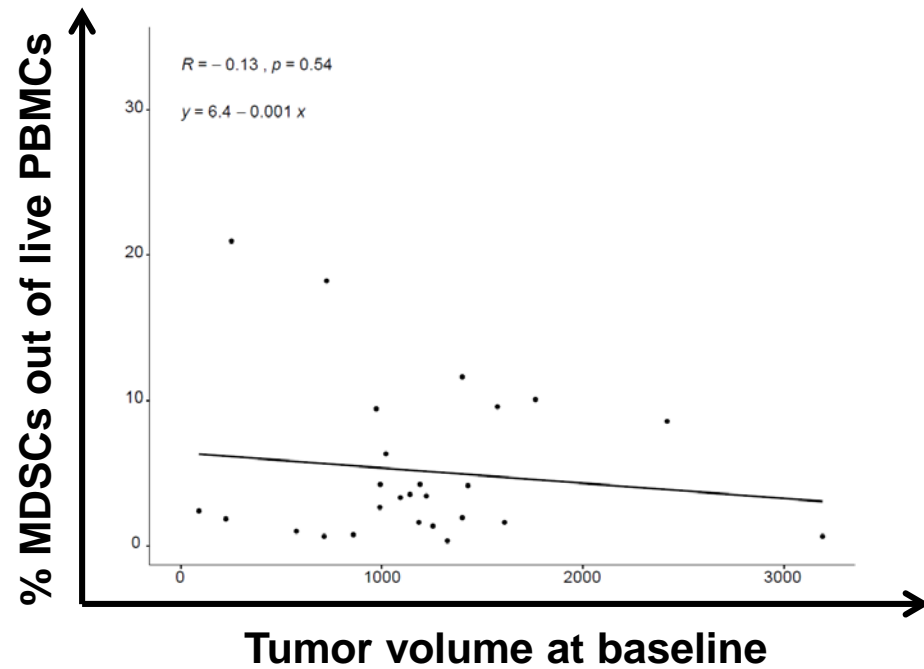

**Spearman rank-order correlation**

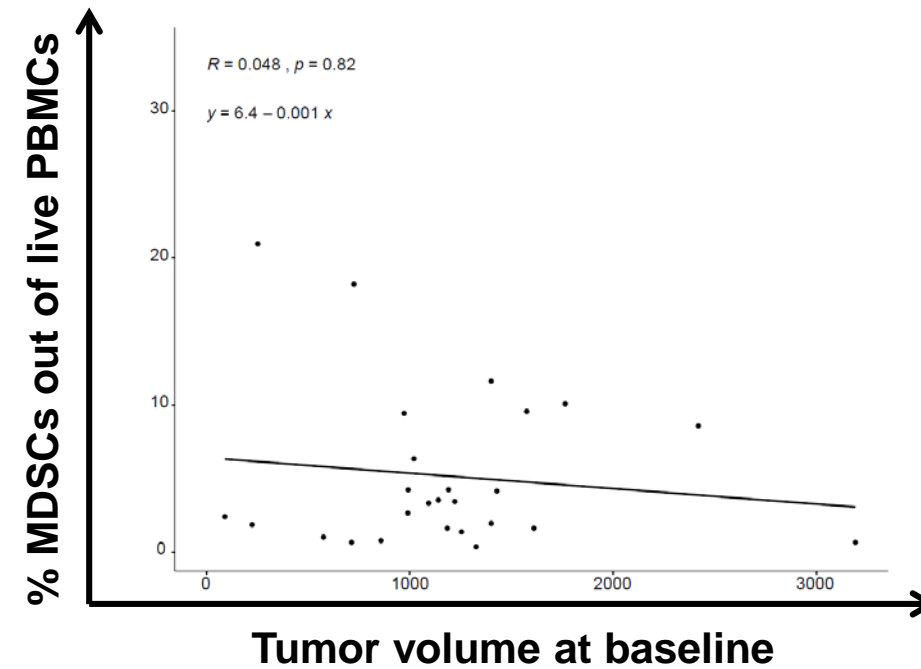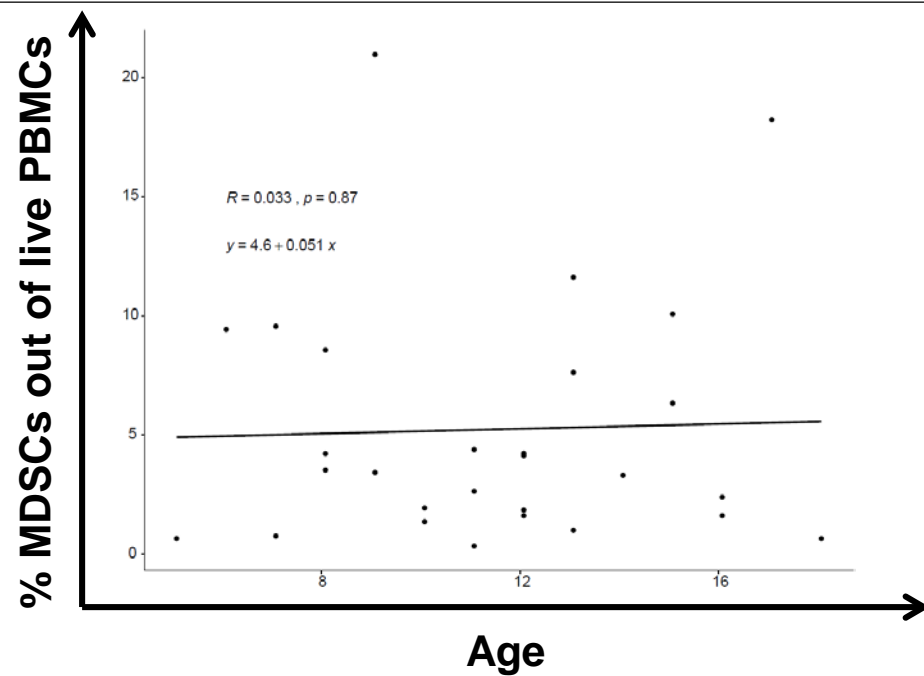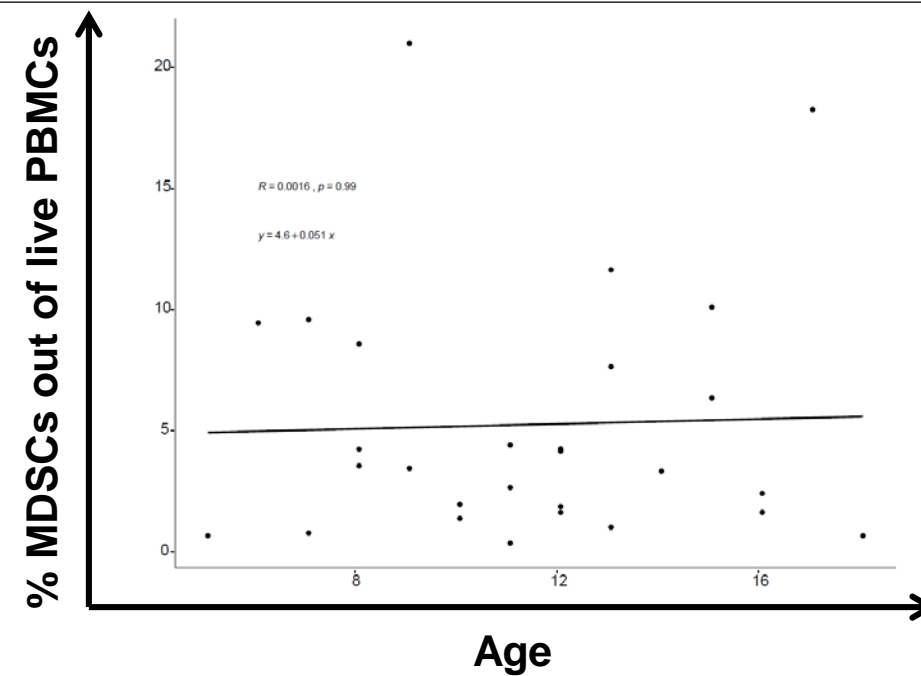

**Figure S19**

**Kaplan-Meier survival curves visualizing OS and PFS of stratum A patients stratified based on Treg abundances above and below median**

## Overall Survival

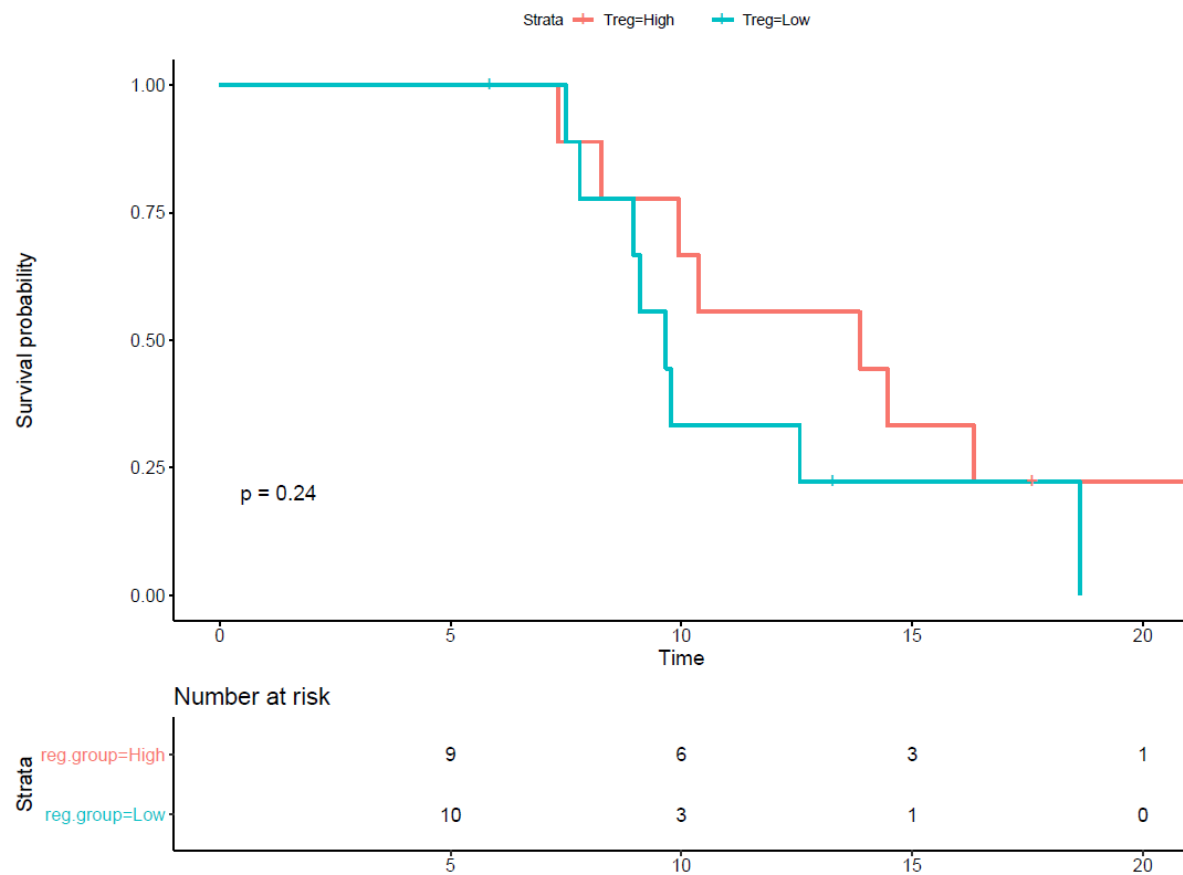

## Progression-free Survival

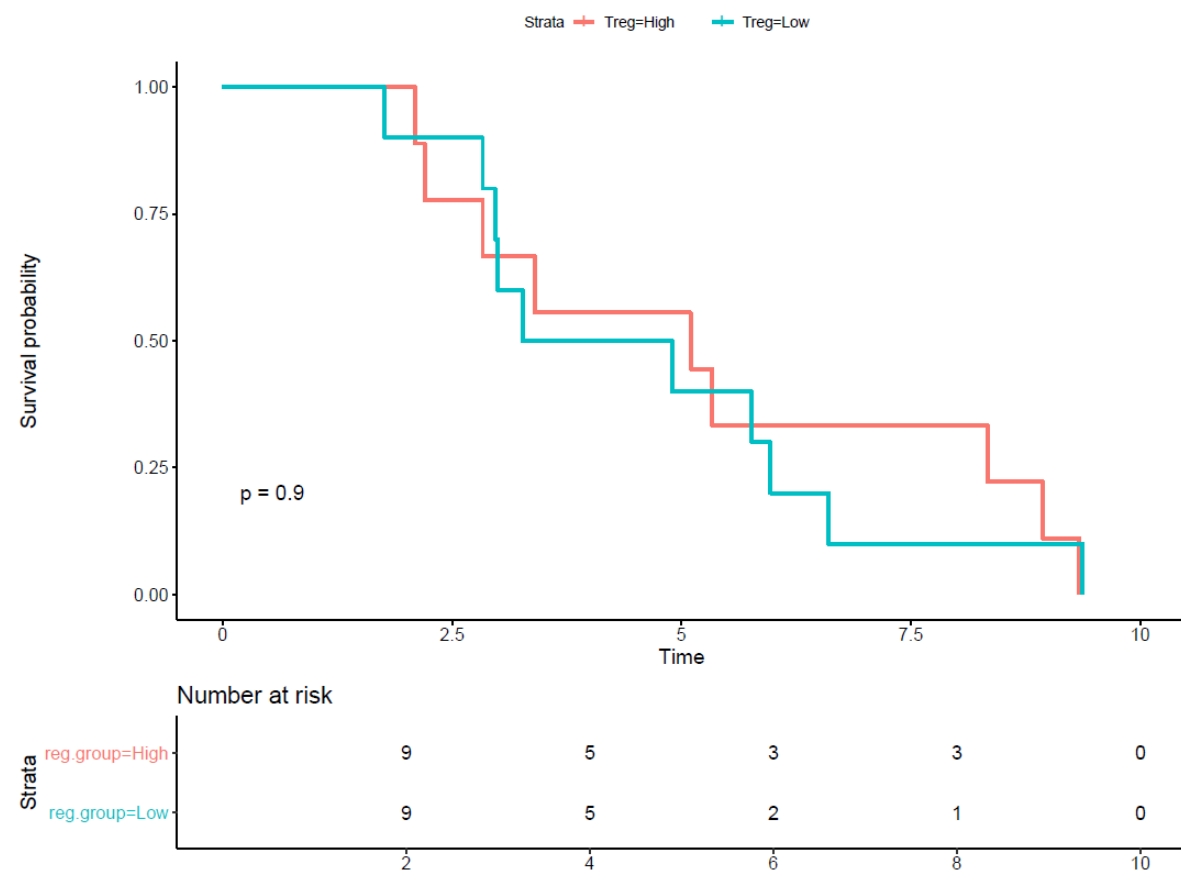

**Figure S20**

**Spider plot depicting longitudinal patient-specific H3.3K27M-reactive CD8+ T-cell frequencies of patients based on dexamethasone administration during vaccine schedule**

**Patients on steroids (n = 7)**

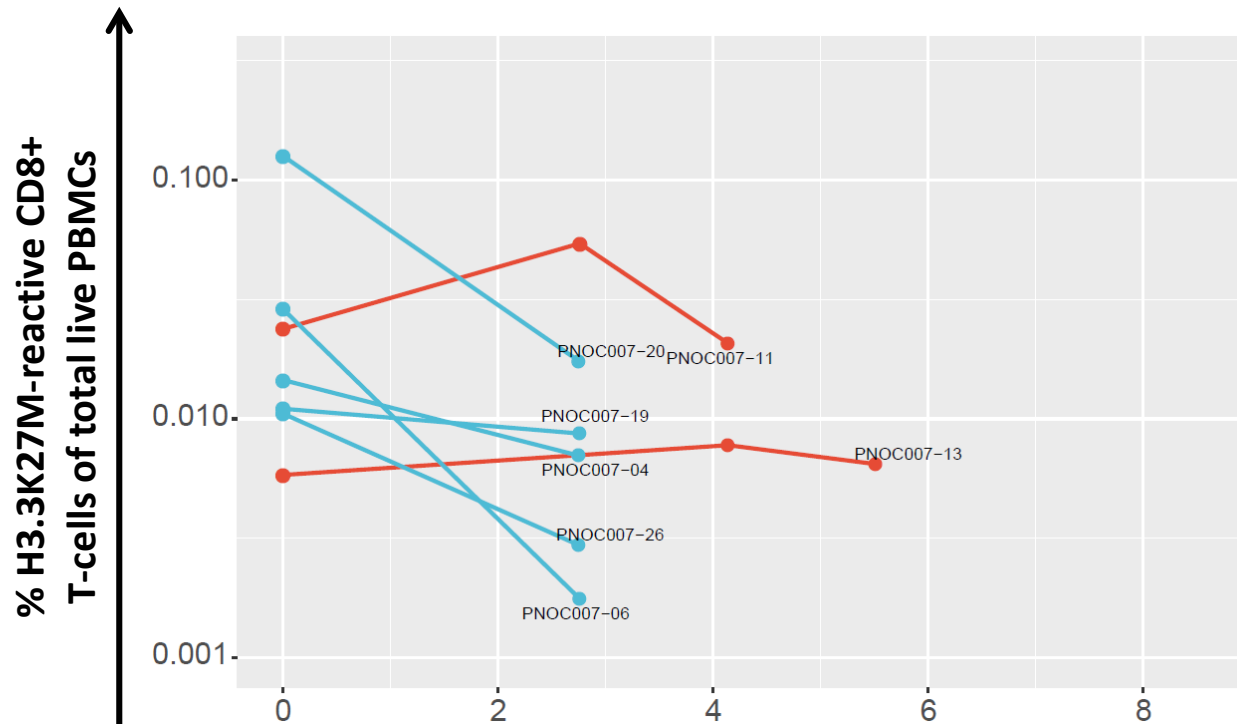

**Patients not on steroids (n = 11)**

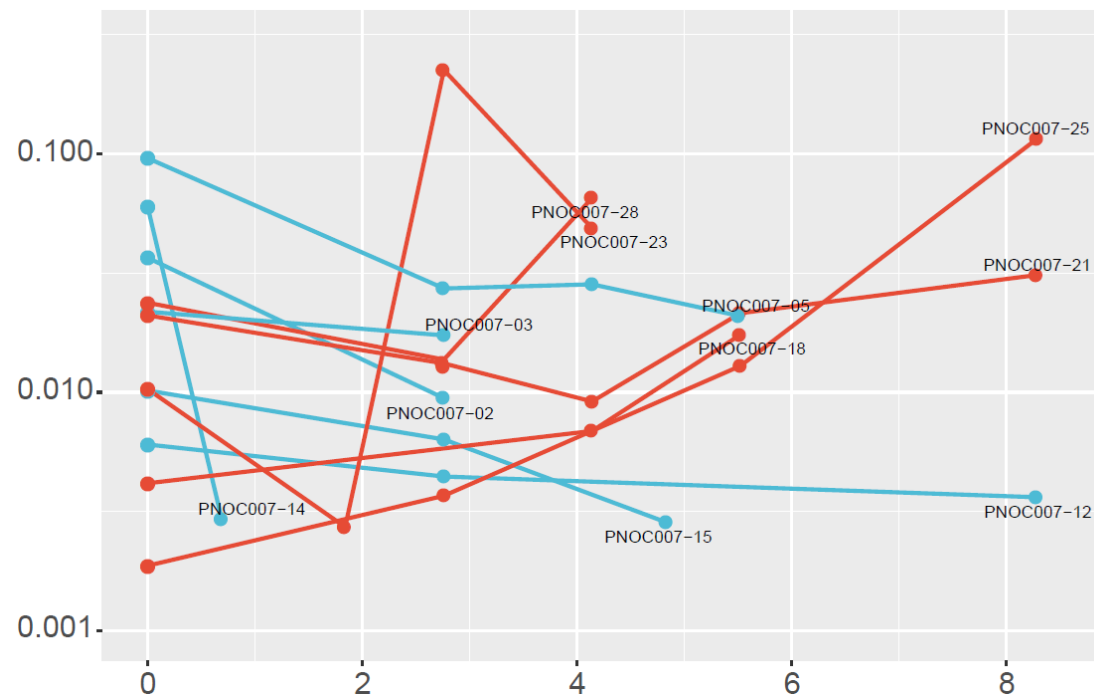

Immunological Response ● Yes ● No

**Time since baseline (months)**

### **Figure S21**

**Dexamethasone administration is associated with circulatory MDSC levels and negatively associated with rates of CD8+ T-cell responses and survival in strata A and B patients.** *Top left*, waterfall plot depicting the overall levels of circulatory MDSCs at baseline among strata A and B patients. *Bottom left*, boxplot depicting overall levels of circulatory MDSCs at baseline among strata A and B patients. *Top right*, waterfall plot depicting the overall longitudinal percent change of H3.3K27M-reactive CD8+ T-cells at the final time point analyzed relative to baseline for patients treated with dexamethasone pre-treatment (*yellow*), patients receiving dexamethasone after commencement of vaccination (*red*), and patients not receiving dexamethasone on study. (*blue*). *Bottom right*, Kaplan-Meier survival curves visualizing the OS of strata A and B patients based on pre-treatment dexamethasone administration. Cohorts were divided by patients not receiving dexamethasone at baseline (*blue*), patients receiving 1mg doses of dexamethasone (*red*), and patients receiving 2mg doses of dexamethasone (*green*).

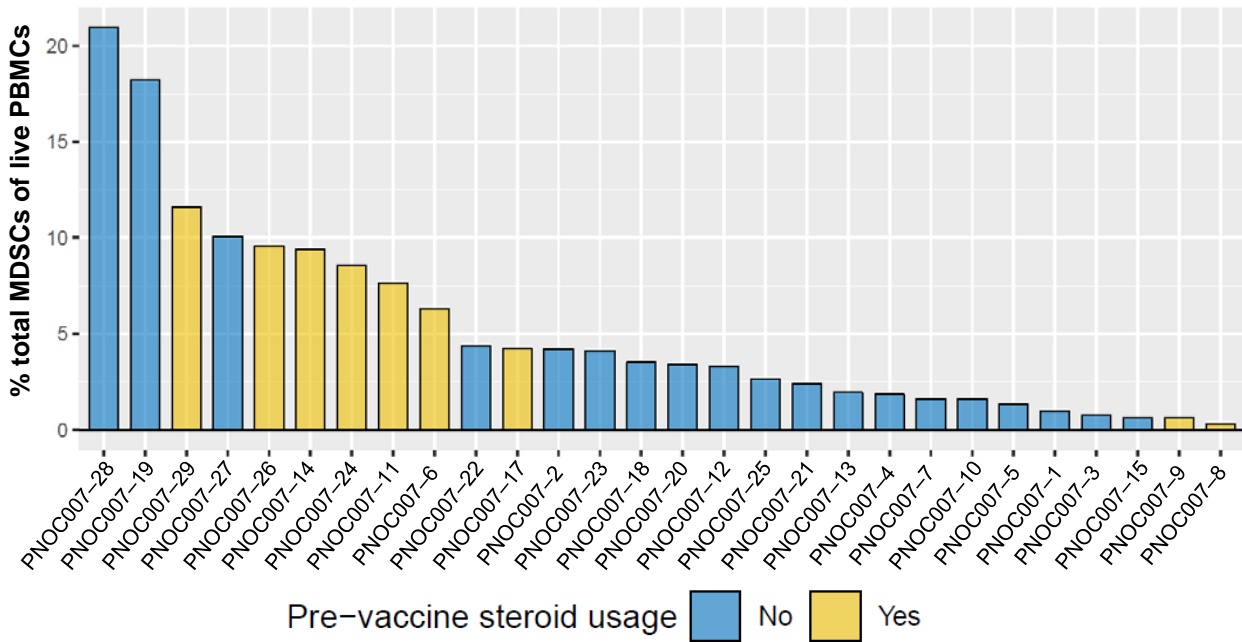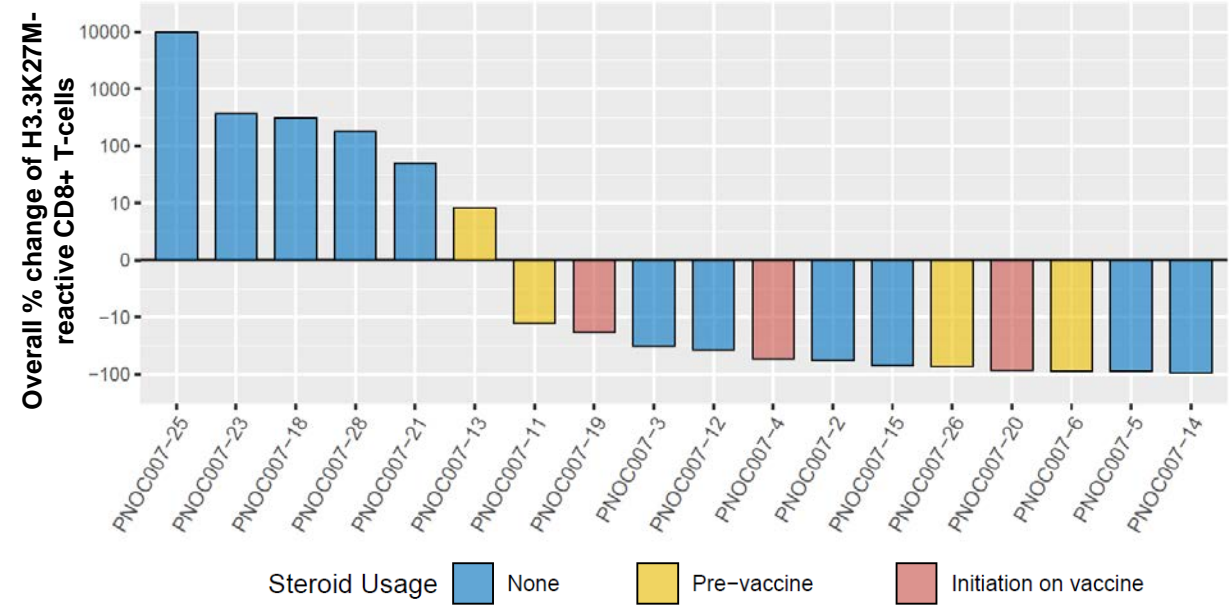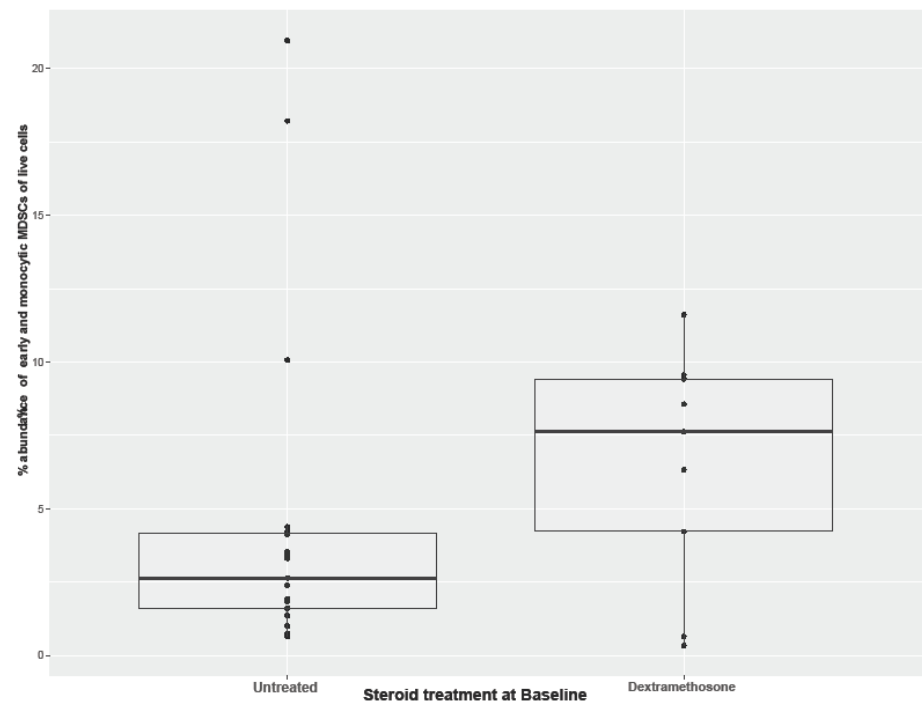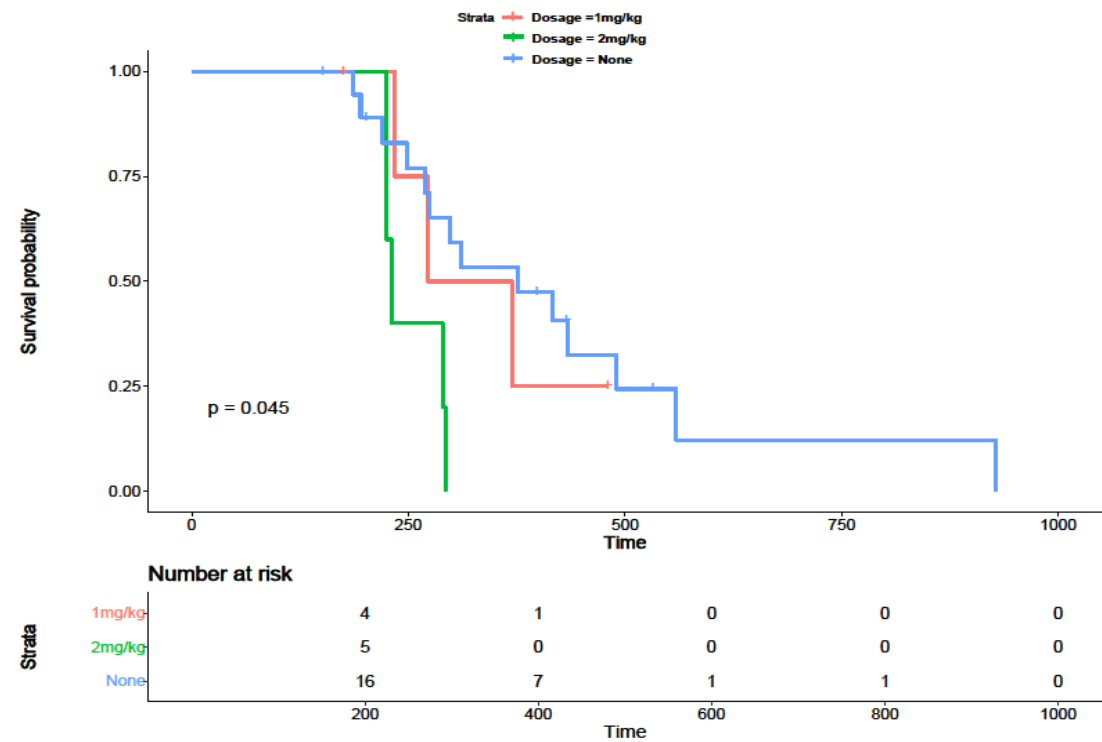

## **Figure S22**

**Post-radiation therapy mutation allelic frequency as assessed by liquid biopsy is not predictive of improved patient outcomes.** *Left*, plasma ctDNA, defined by H3.3K27M mutation allele frequency (MAF)  $\geq 0.001\%$ , was detected at baseline (Week 0), in 19 out of 27 patients (70.4%; n=13 Stratum A, n=6 Stratum B). *Right*, Kaplan-Meier survival curves visualizing the OS (top) and PFS (bottom) for patients from which plasma ctDNA was detected at baseline (*red*) compared to patients who did not exhibit plasma ctDNA (*blue*).

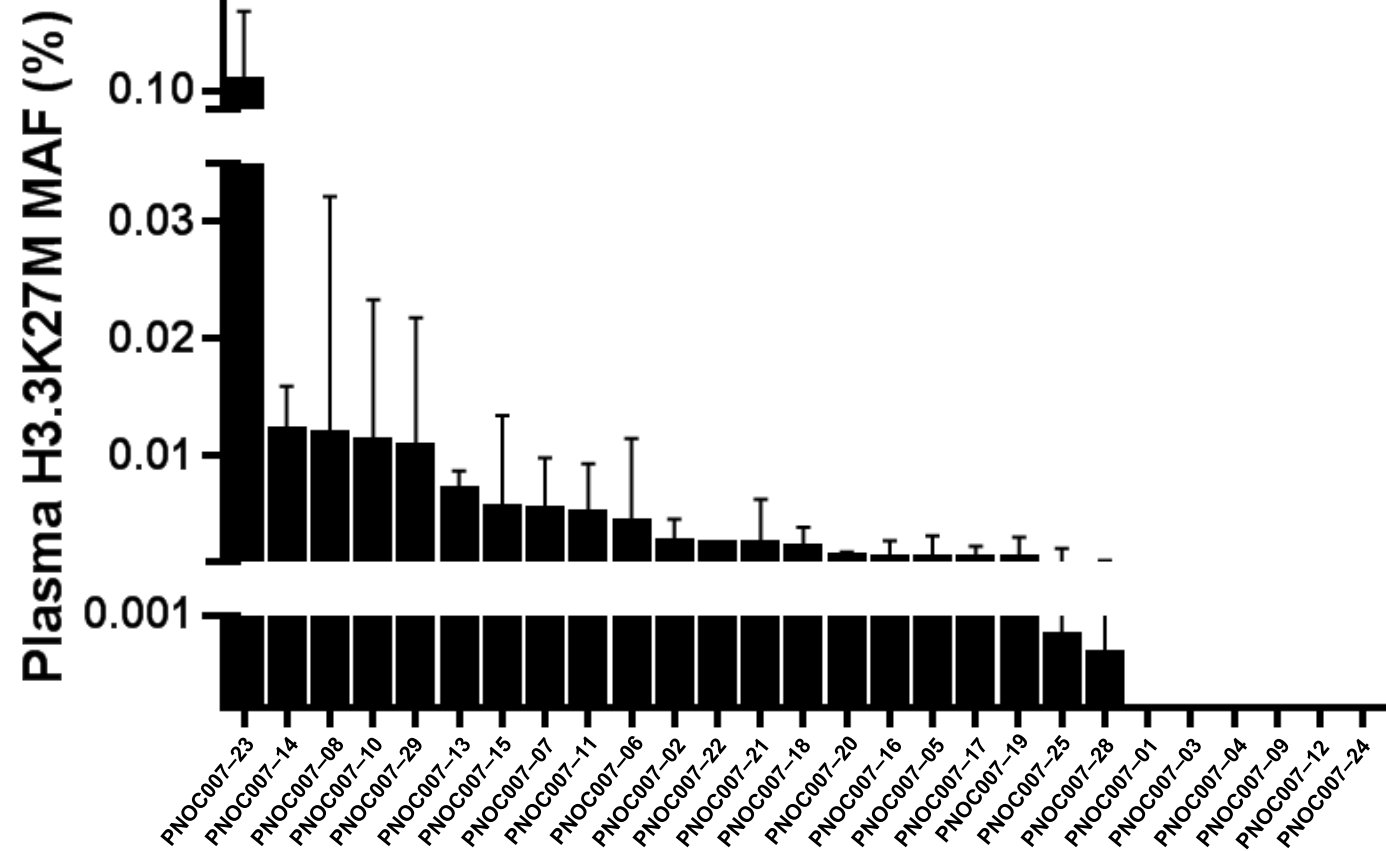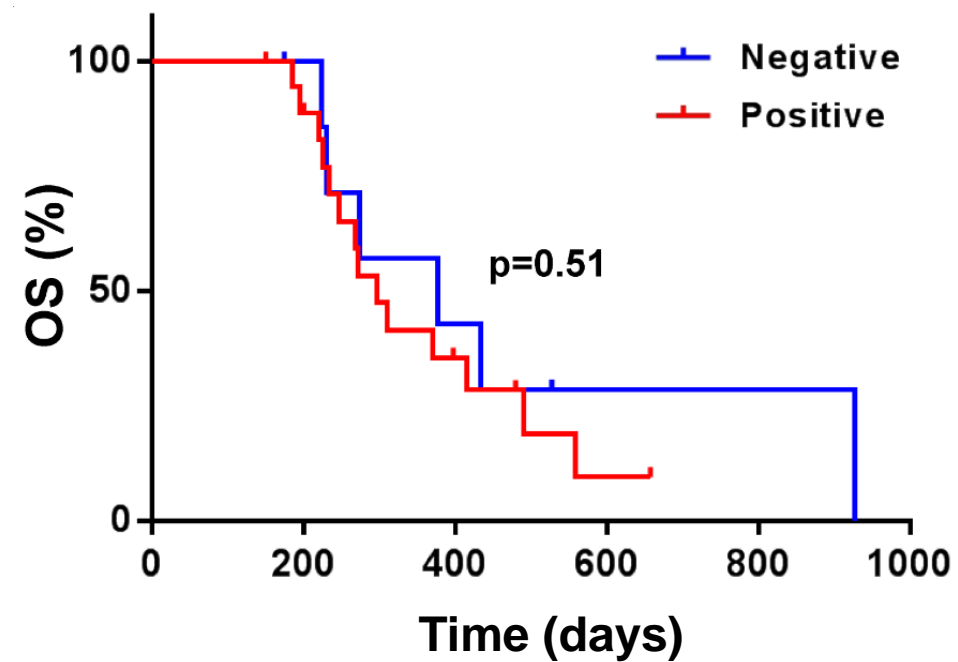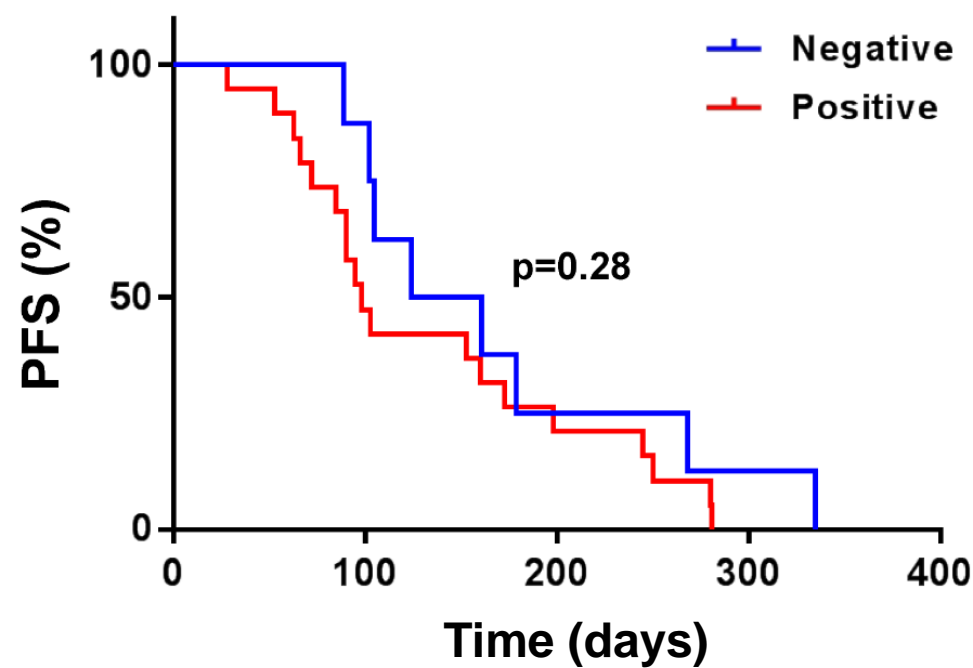

### **Figure S23**

**Longitudinal fluctuations in plasma ctDNA do not correlate with patient outcomes.** *Left*, longitudinal monitoring of plasma ctDNA indicates changes in ctDNA abundance during the course of therapy, as exemplified by serial ctDNA analysis from six patients (PNOC007-13, -14, -18, -21, -23 and -25). *Right*, Kaplan-Meier curve visualizing the OS of patients exhibiting an increase in plasma ctDNA between baseline and week 12 (*red*) compared to patients who showed a decrease during this time (*blue*).

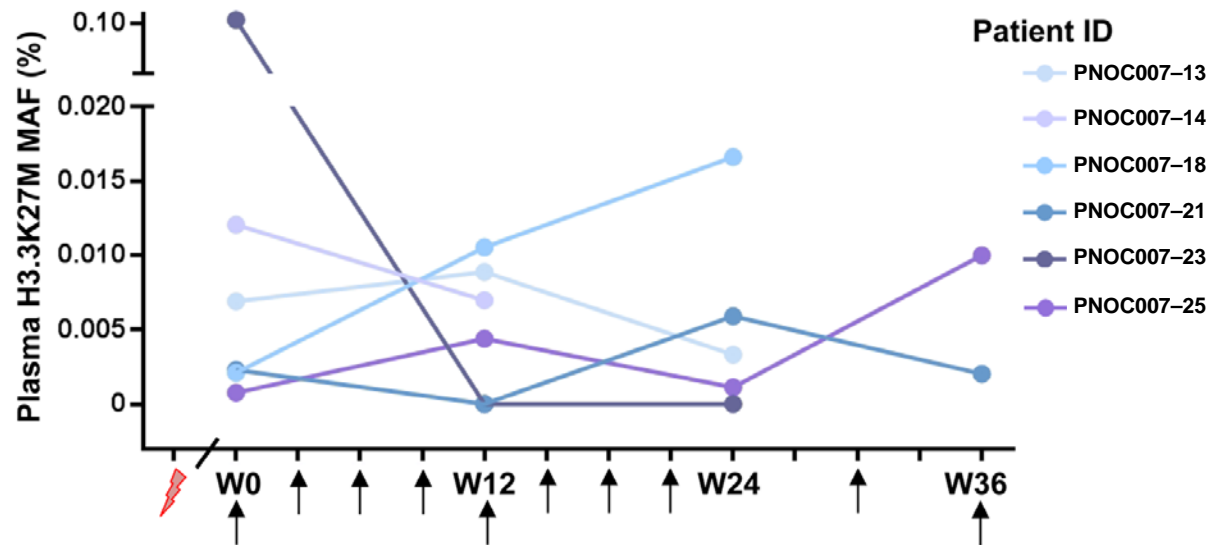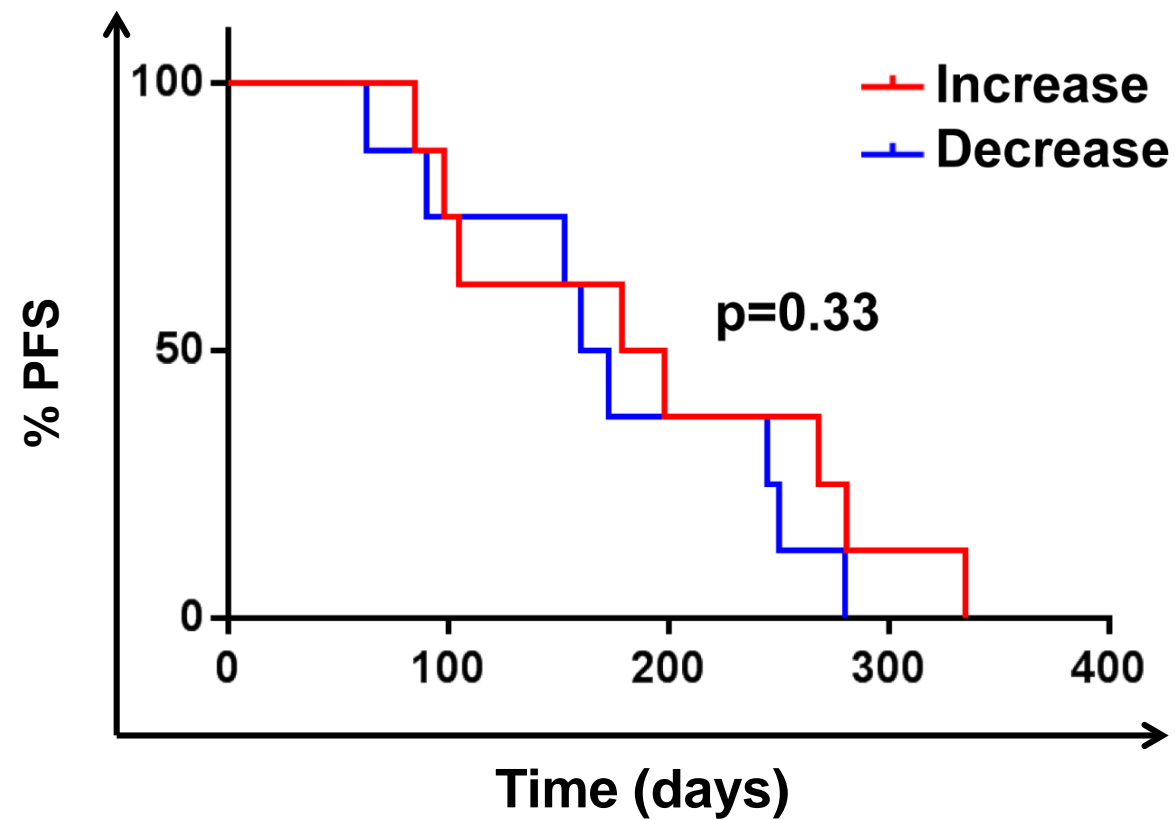

**Figure S24**

**Kaplan-Meier survival curve visualizing OS of patients stratified based on a median threshold of tumor volume at baseline**

### Strata A + B Patients

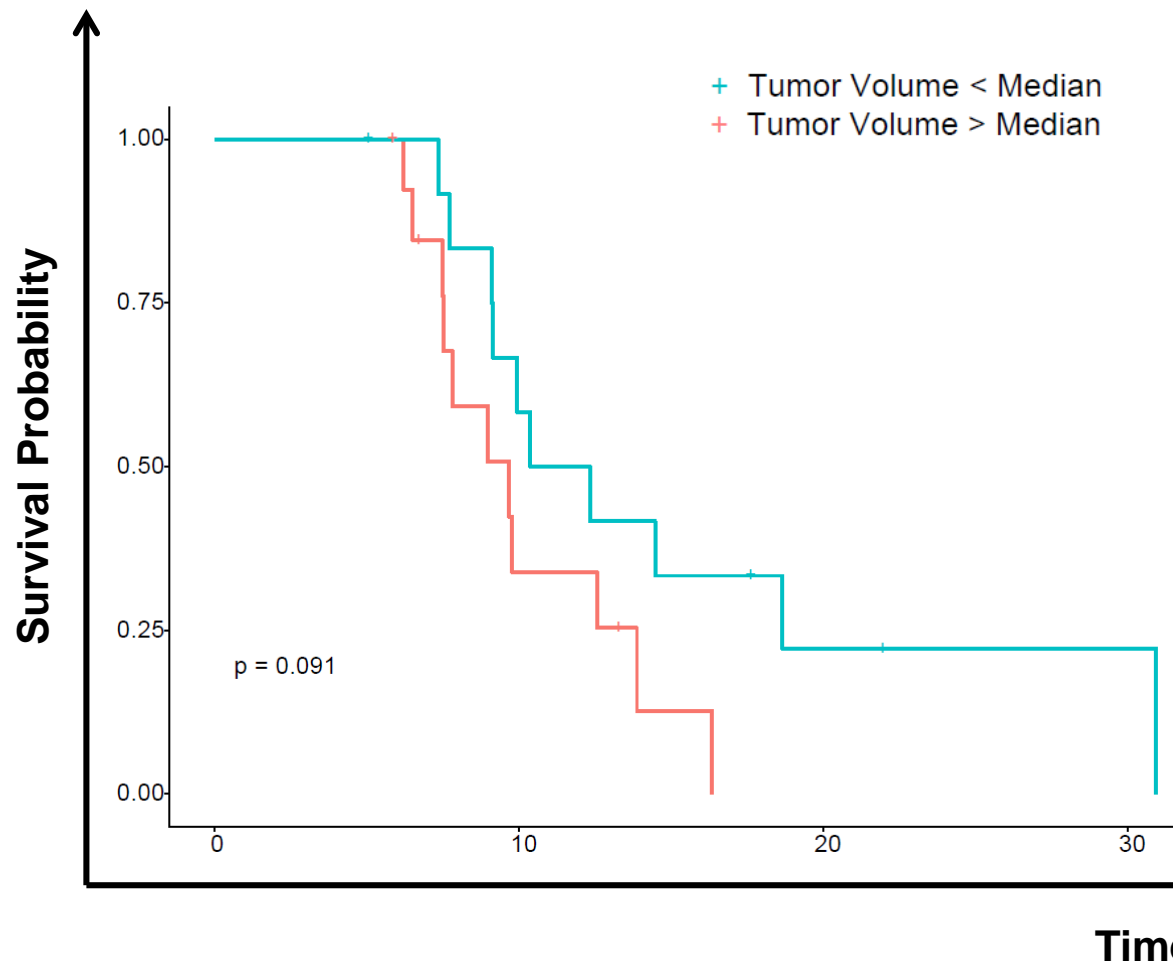

### Stratum A Patients

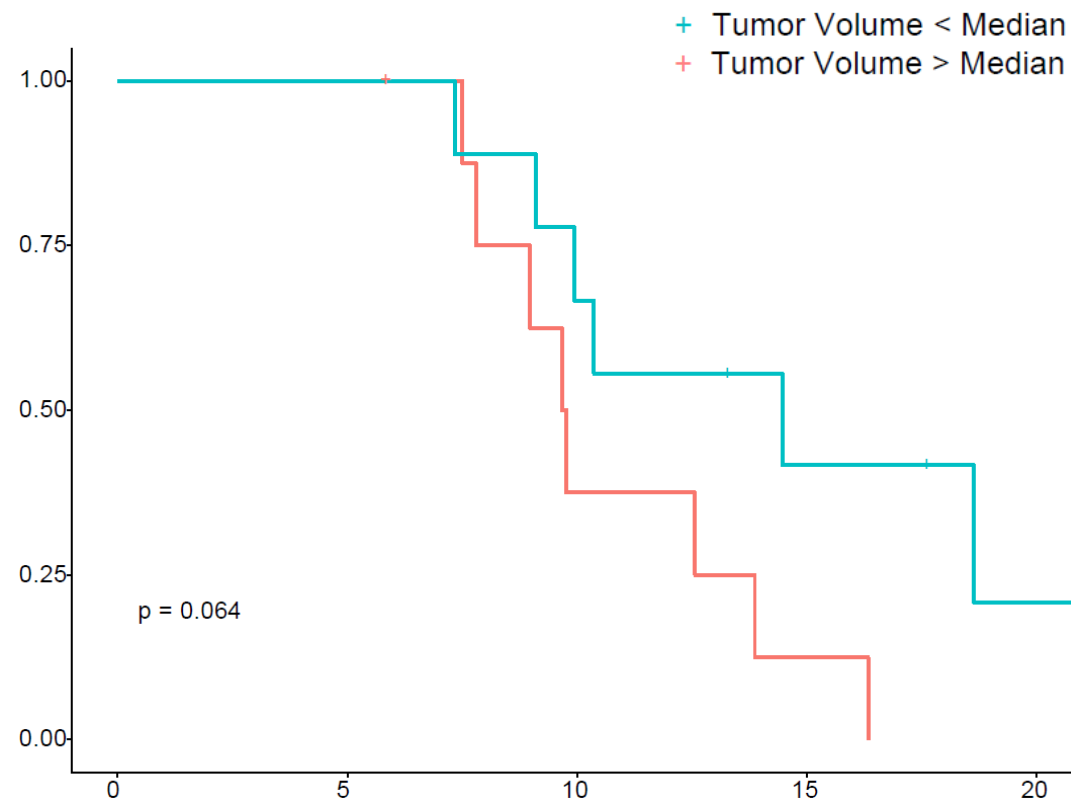

**Figure S25**

**Kaplan-Meier survival curve visualizing OS of patients stratified based on upper and lower quartiles of tumor volume at baseline**

### Strata A + B Patients

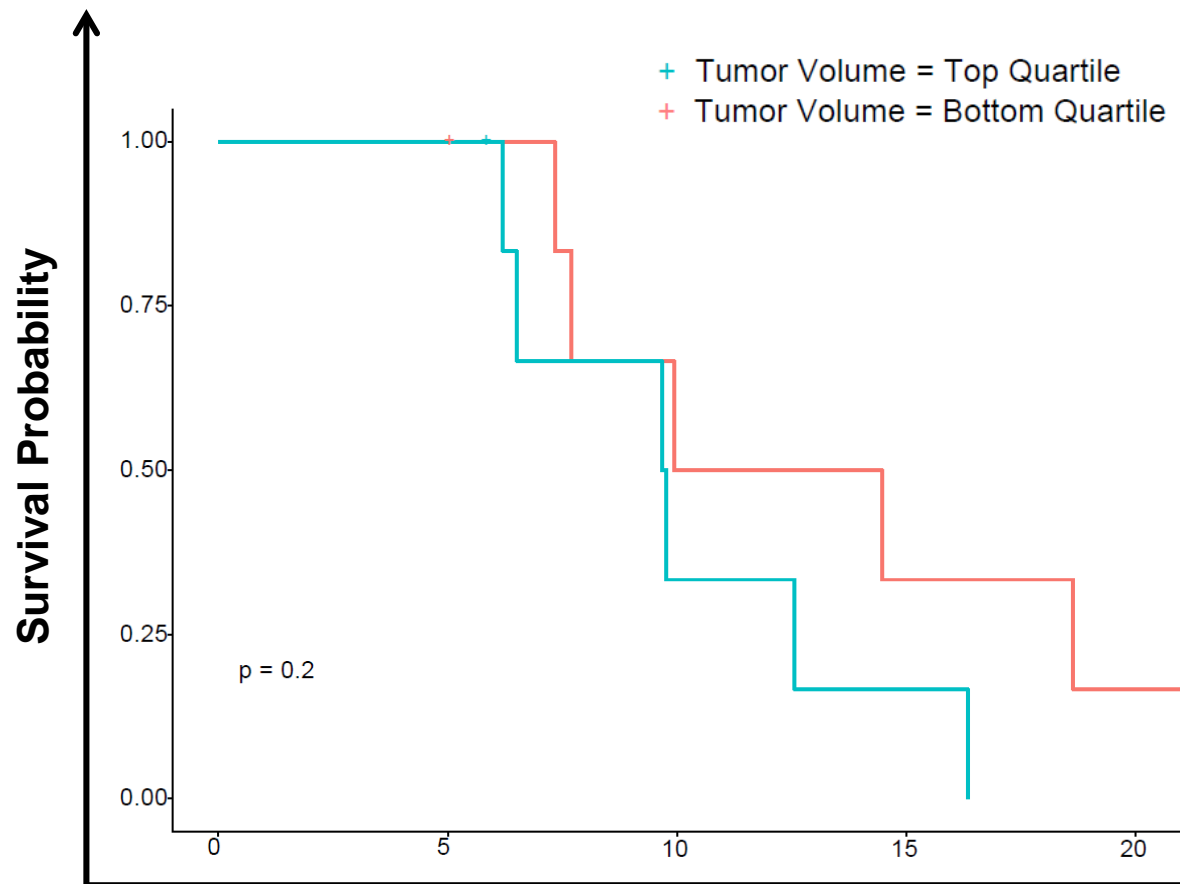

### Stratum A Patients

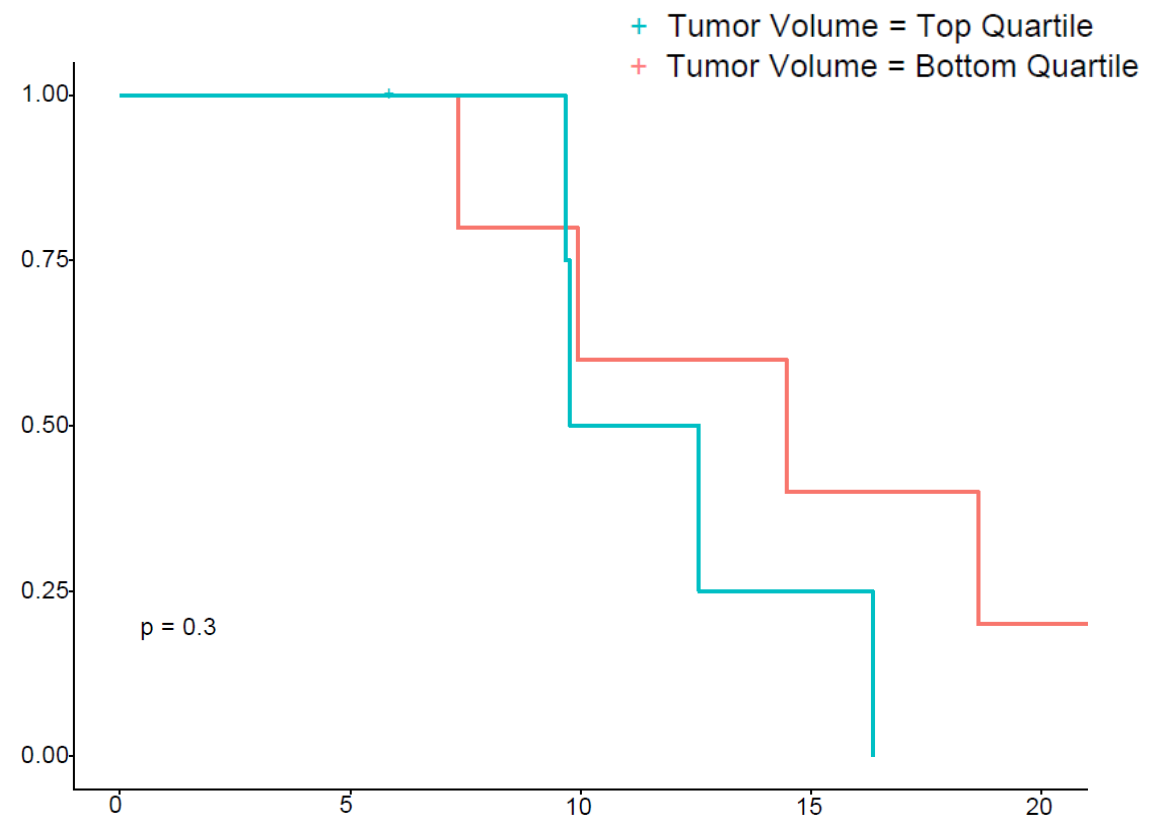

Time (months)

### **Figure S26**

**Representative immunofluorescence images quantifying MDSC abundance in tumor microenvironment.** Live cells were identified using DAPI nuclear stain. MDSCs were identified using FITC-conjugated Iba1, Cy5-conjugated CD33, and rhodamine-conjugated HLA-DR antibodies. MDSCs were classified as live cells that were Iba1<sup>+</sup> CD33<sup>+</sup> HLA-DR<sup>lo/-</sup>.

PNOC007-05

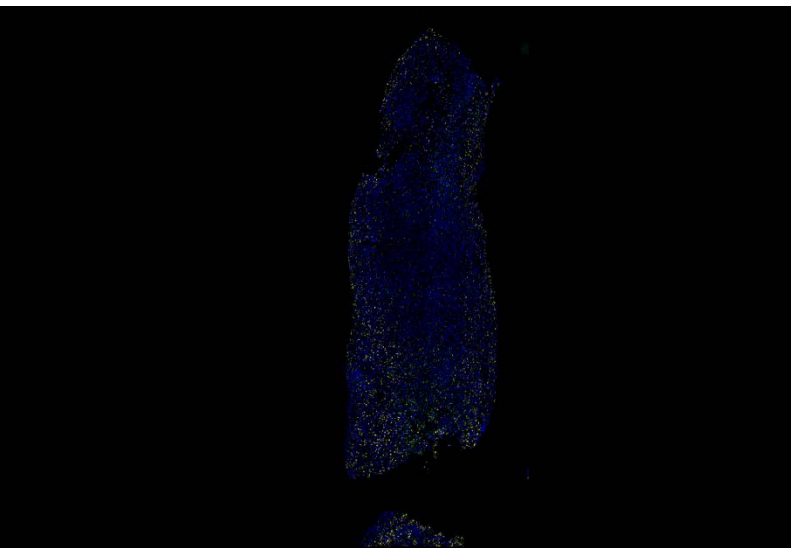

PNOC007-17

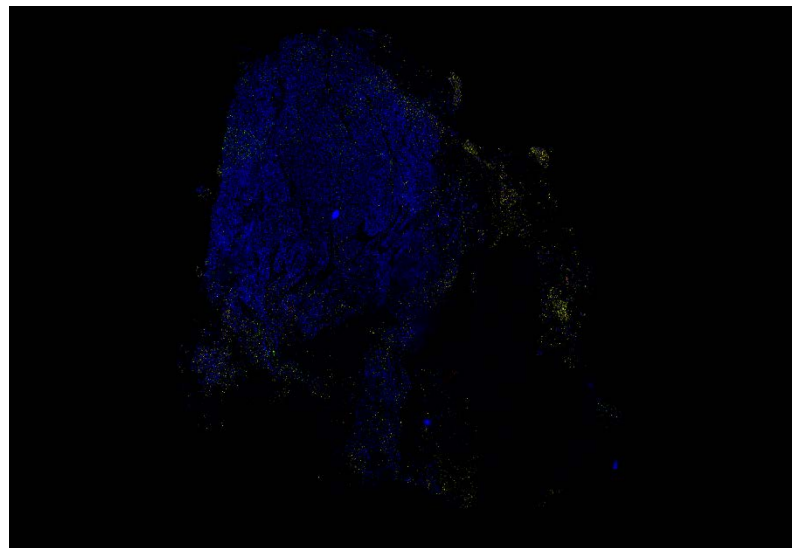

PNOC007-22

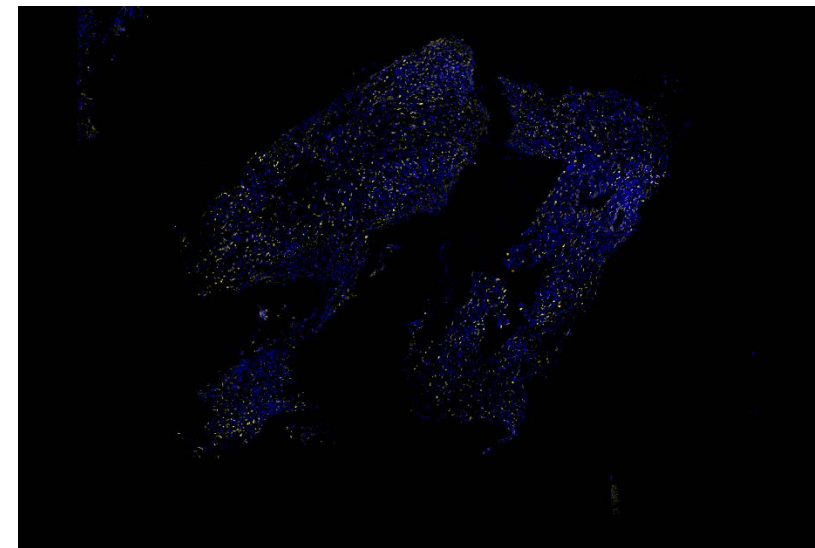

| Patient ID | Number of cells analyzed: | % MDSCs of live cells in TME | % MDSCs of live cells in PBMCs |
|------------|---------------------------|------------------------------|--------------------------------|
| PNOC007-05 | 4.25e4                    | 0.019%                       | 1.36%                          |
| PNOC007-17 | 6.44e6                    | 0.153%                       | 4.22%                          |
| PNOC007-22 | 4.22e5                    | 0.0047%                      | 4.38%                          |

**Figure S27**

**Corroboratory plot between circulatory MDSCs analyzed on CyTOF and MDSCs identified through immunohistochemistry.**

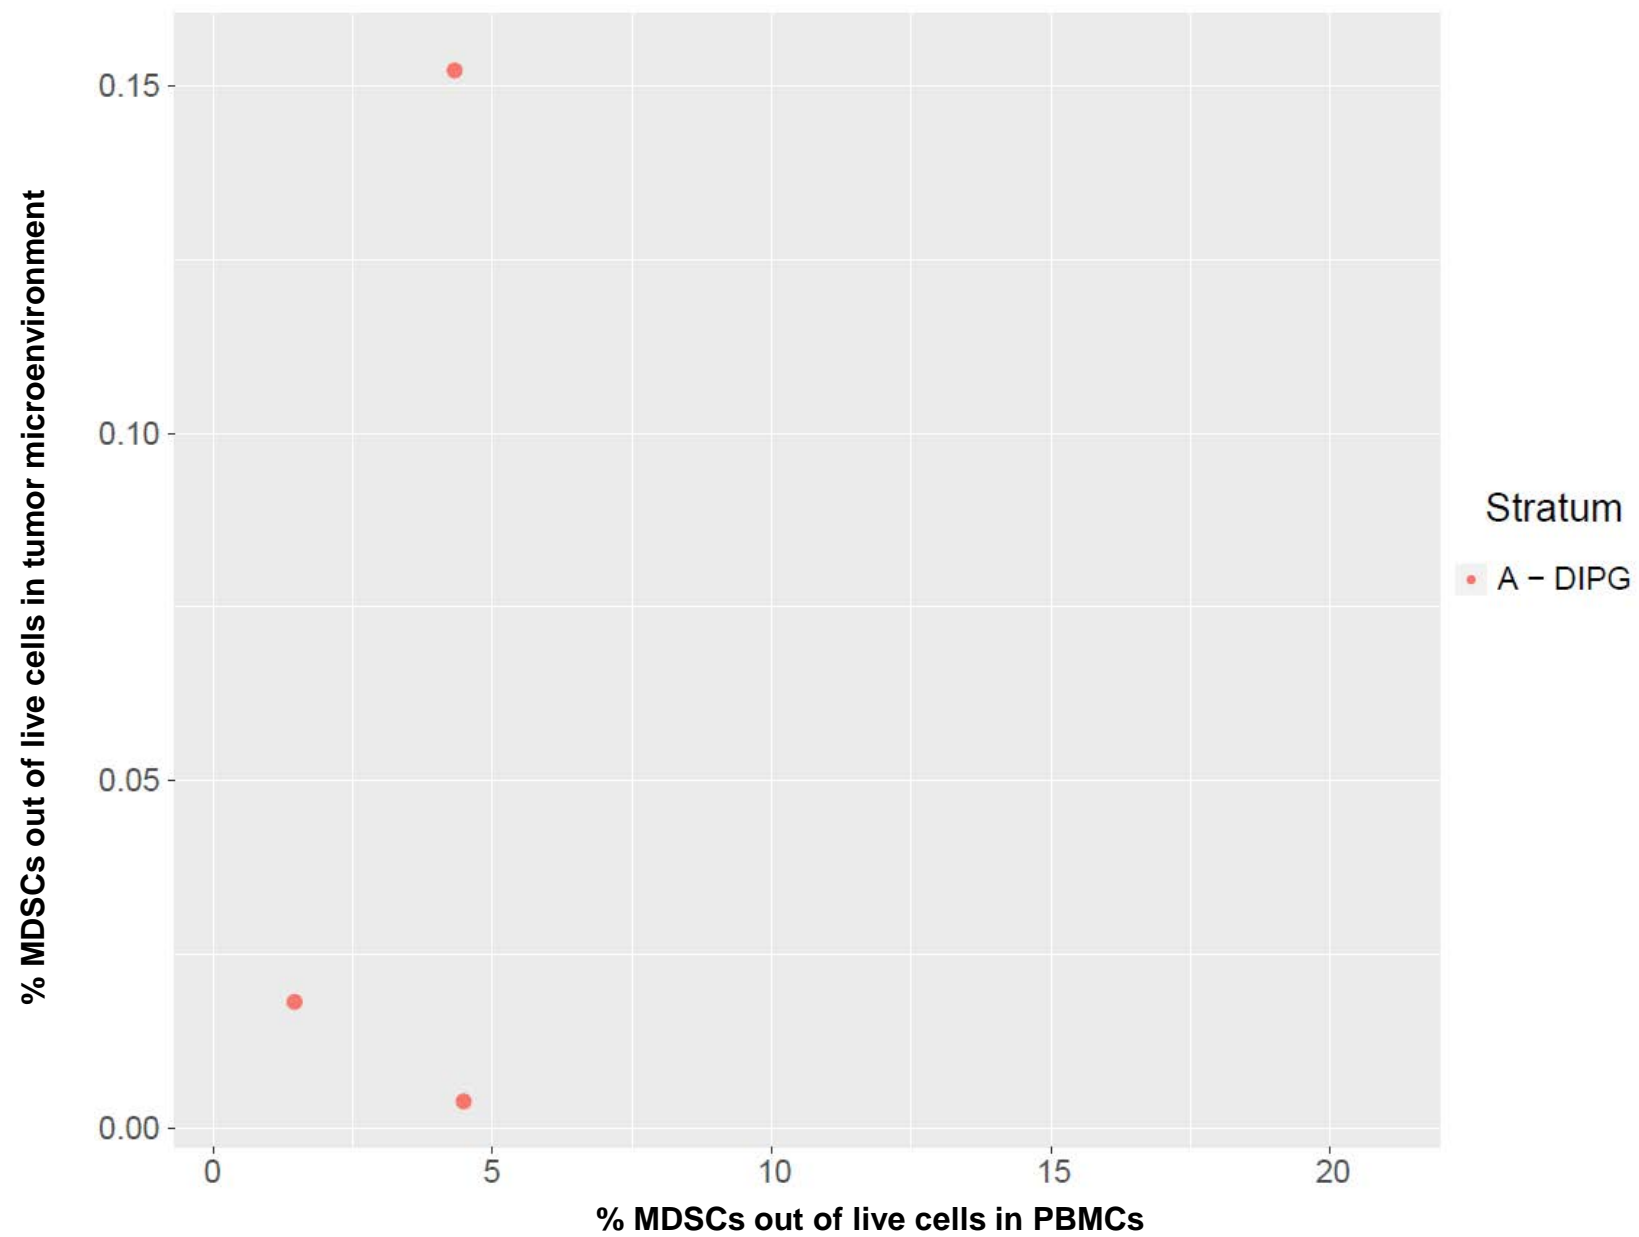

**Figure S28**

**PNOC007 clinical trial therapy schema**

## Therapy Schema

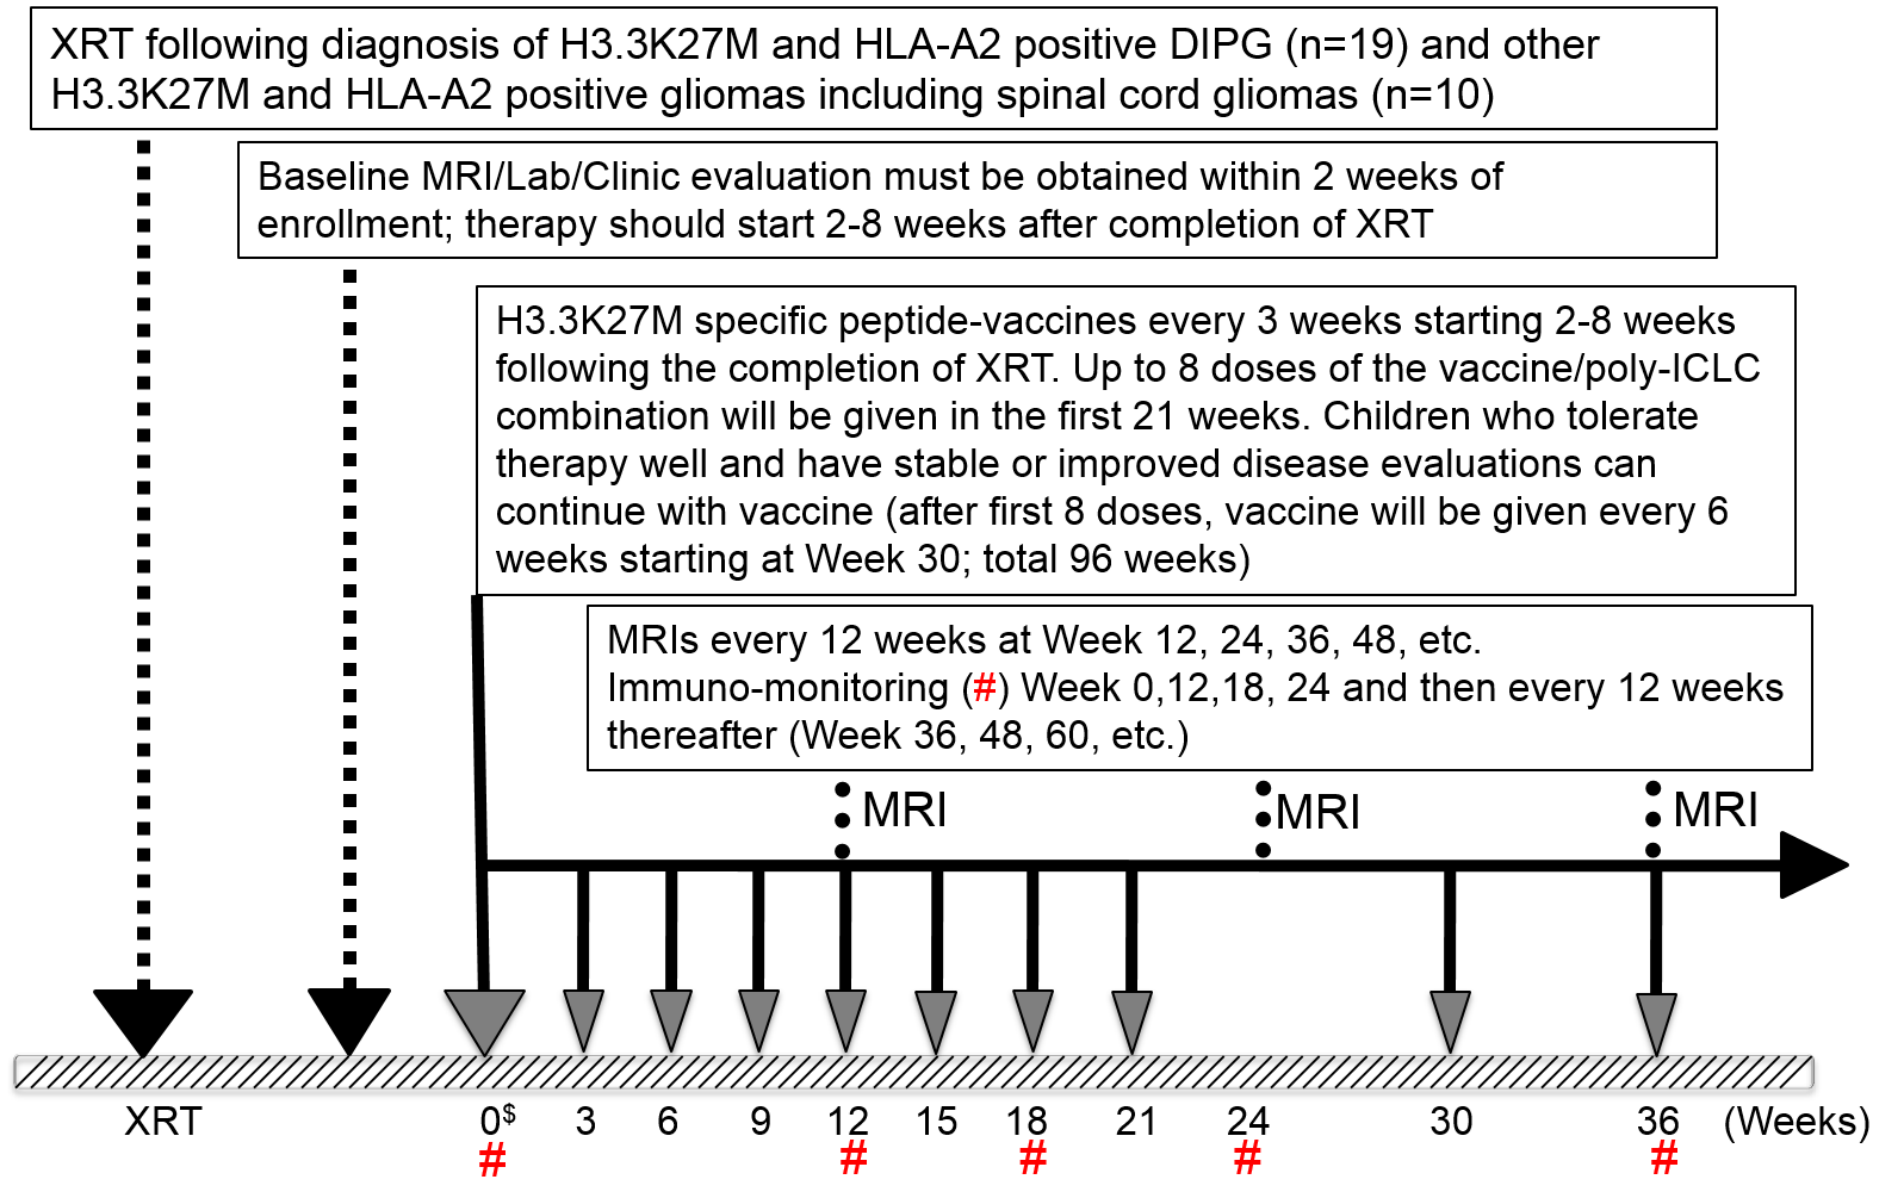

<sup>\$</sup>If evidence of radiation induced pseudo-progression on baseline MRI, poly-ICLC administration can be held for up to 12 weeks
