# Supplementary material
Source: PubMed Central journal article supplement (PMC7685729)
Supplement: jci-130-140378-s082.pdf [file jci-130-140378-s082.pdf]

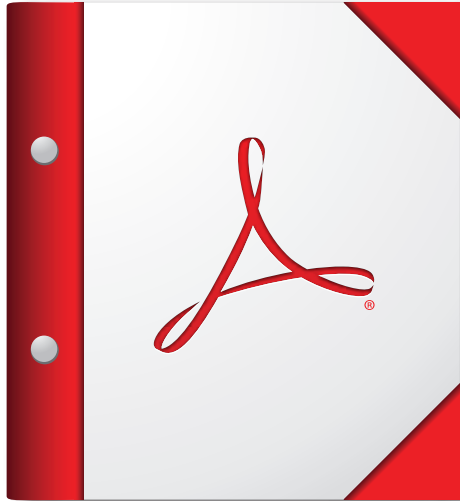

**For the best experience, open this PDF portfolio in  
Acrobat X or Adobe Reader X, or later.**

[Get Adobe Reader Now!](#)
